# Supplementary material
Source: ML conference proceedings conference paper supplement (https://openreview.net/forum?id=scpBMrMSMt)
Supplement: supplementary_material [file Appendix.pdf › Supplementary Material/Appendix.pdf]

---

# Appendix for MultiDiffNet: A Multi-Objective Diffusion Framework for Generalizable Brain Decoding

---

Anonymous Author(s)

Affiliation

Address

email

|    |                                                                  |           |
|----|------------------------------------------------------------------|-----------|
| 1  | <b>Contents</b>                                                  |           |
| 2  | <b>1 Implementation and experimental details</b>                 | <b>3</b>  |
| 3  | 1.1 Related work . . . . .                                       | 3         |
| 4  | 1.2 Mixup strategies . . . . .                                   | 3         |
| 5  | 1.3 Loss functions . . . . .                                     | 3         |
| 6  | 1.3.1 Classification loss. . . . .                               | 3         |
| 7  | 1.3.2 Supervised contrastive loss. . . . .                       | 4         |
| 8  | 1.3.3 L1 reconstruction loss. . . . .                            | 4         |
| 9  | <b>2 Generalization performance and analysis</b>                 | <b>5</b>  |
| 10 | <b>3 Complete ablation studies</b>                               | <b>6</b>  |
| 11 | 3.1 Decoder input ablations . . . . .                            | 6         |
| 12 | 3.2 Classifier head ablations . . . . .                          | 8         |
| 13 | 3.3 Encoder and decoder ablations . . . . .                      | 10        |
| 14 | 3.4 Loss combinations ablations . . . . .                        | 12        |
| 15 | 3.5 Mixup strategies ablations . . . . .                         | 14        |
| 16 | <b>4 Complete statistical reporting results</b>                  | <b>18</b> |
| 17 | 4.1 Methodology . . . . .                                        | 18        |
| 18 | 4.2 Results . . . . .                                            | 18        |
| 19 | 4.2.1 Practical evidence assessments . . . . .                   | 18        |
| 20 | 4.2.2 Bayesian evidence assessment . . . . .                     | 18        |
| 21 | 4.2.3 Wilcoxon signed rank tests and permutation tests . . . . . | 18        |

## 22 **Appendix overview**

23 This appendix provides full experimental details, supporting results, and statistical analyses that  
24 complement the main paper:

- 25 • **Section 1: Implementation and experimental details**  
26 Covers architecture choices, training setups, loss function derivations, and augmentation  
27 strategies.
- 28 • **Section 2: Generalization performance and analysis**  
29 Presents extended decoding results across all tasks with seen/unseen splits.
- 30 • **Section 3: Complete ablation studies**  
31 Contains exhaustive ablations over decoder input types, classifier heads, architectural vari-  
32 ants, mixup strategies, and loss function choices. Each is accompanied by multi-task re-  
33 sults.
- 34 • **Section 4: Complete statistical reporting results**  
35 Details our trend-level statistical framework, including effect size estimation, Bayesian  
36 comparison, and win-rate matrix construction.

37 We include additional sections from the main text (e.g., Related Work) that were moved here due to  
38 space constraints.

# 1 Implementation and experimental details

## 1.1 Related work

**EEG Decoding and Generalization** EEG decoding has evolved from handcrafted features to deep architectures, with EEGNet emerging as a widely adopted baseline due to its efficient depth-wise-separable convolutions and lightweight design [Lawhern et al., 2018]. Recent models explore transformers [Liao et al., 2025, Song et al., 2022] and graph neural networks [Tang et al., 2024, Hu et al., 2023], but EEGNet remains favored for its robustness and simplicity. A key limitation is poor cross-subject generalization, with 20-40% accuracy drops despite strong within-subject performance [Huang et al., 2023, Barmpas et al., 2023]. Attempts to address this require expensive calibration [Rommel et al., 2022, Liu et al., 2022, Wu, 2016]. Scalable BCIs require subject-agnostic models that generalize without per-user retraining.

**Diffusion Models for EEG** Denoising Diffusion Probabilistic Models (DDPMs) model data distributions via iterative denoising and outperform GANs in EEG synthesis by avoiding mode collapse [Tosato et al., 2023, Ho et al., 2020]. Recent enhancements, such as reinforcement learning [An et al., 2024] and progressive distillation [Torma and Szegletes, 2025], have further improved realism and sampling speed. Diff-E [Kim et al., 2023] extended diffusion to imagined-speech decoding via joint reconstruction and classification, but remained task-specific and did not address cross-subject generalization. Broader research suggests that combining generative and discriminative objectives yields stronger representations [Chow et al., 2024, Grathwohl et al., 2019], yet EEG models typically optimize only one. We explore this joint learning paradigm across diverse EEG tasks, aiming to learn generalizable representations that capture both signal structure and task-relevant information.

**Mixup Methods** Signal-level augmentation has evolved from basic jittering and filtering to temporal, spectral, and channel-wise mixup [Luo and Cai, 2025, Liu et al., 2025, Kim et al., 2021, Pei et al., 2021, Zhang et al., 2017], but many variants introduce unrealistic artifacts that hinder generalization. This motivates our systematic evaluation of weighted and temporal input mixup across encoder layers, along with latent-space mixing

**Evaluation Strategies** Effective cross-subject EEG decoding requires both rigorous training strategies and standardized evaluation. Leave-one-subject-out (LOSO) validation remains common but is computationally intensive and impractical for real-time deployment [Del Pup et al., 2025, Chen et al., 2025, Zhao et al., 2024, Barmpas et al., 2023, Kunjan et al., 2021], while simpler subject splits often neglect session independence and true seen/unseen separation [Zhang et al., 2023]. We address it in our work by introducing a standardized subject- and session-disjoint evaluation.

## 1.2 Mixup strategies

---

### Algorithm 1 Temporal Masked Mixup

---

- 1: Initialize a binary mask  $M \in \{0, 1\}^{C \times T}$  with all zeros.
  - 2: Flip each 0 in  $M$  to 1 with probability  $p = 0.01$ .
  - 3: **for** each position in  $M$  with value 1 **do**
  - 4:     Expand to a temporal window of random length (uniform between min and max size).
  - 5: **end for**
  - 6: Flip each 1 in  $M$  to  $-1$  with:
    - Fixed probability 0.5 (**fixed ratio**), or
    - Probability drawn from Beta(0.2, 0.2) each epoch (**random ratio**).
  - 7: Apply the final mask:
    - $0 \rightarrow x$  (original input)
    - $1 \rightarrow \hat{x}$  (DDPM output)
    - $-1 \rightarrow x_{\text{dec}}$  (decoder output)
- 

## 1.3 Loss functions

### 1.3.1 Classification loss.

We use either cross-entropy (CE) or mean squared error (MSE).

75 CE uses softmax over the classifier logits:

$$\mathcal{L}_{\text{CE}} = - \sum_{c=1}^N y_c \log \hat{y}_c, \quad \hat{y} = \text{Softmax}(\text{FC}(z))$$

76 MSE treats classification as regression:

$$\mathcal{L}_{\text{MSE}} = \|\hat{y} - y\|_2^2$$

77 **1.3.2 Supervised contrastive loss.**

78 A projection head maps the normalized embedding  $z$  to  $z_{\text{proj}}$ . We then use the SupCon loss:

$$\mathcal{L}_{\text{SupCon}} = \sum_{i \in I} \frac{-1}{|P(i)|} \sum_{p \in P(i)} \log \frac{\exp(z_i \cdot z_p / \tau)}{\sum_{a \in A(i)} \exp(z_i \cdot z_a / \tau)}$$

79 where  $\tau$  is the temperature,  $P(i)$  are positives, and  $A(i)$  includes all non-anchor samples.

80 **1.3.3 L1 reconstruction loss.**

81 The decoder learns to reconstruct the DDPM-denoised signal:

$$\mathcal{L}_{\text{L1}} = \|x_{\text{dec}} - \hat{x}\|_1$$

82 We also compute an auxiliary loss  $\|\hat{x} - x\|_1$  to guide DDPM training but exclude it from the final  
83 objective.

Table 1: Final results across tasks and models

| Task Paradigm | Configuration      | Seen                               |                  |                                    |                                    | Unseen                             |                                    |                                    |                                    |
|---------------|--------------------|------------------------------------|------------------|------------------------------------|------------------------------------|------------------------------------|------------------------------------|------------------------------------|------------------------------------|
|               |                    | Acc (%)                            | F1 (%)           | Recall (%)                         | AUC (%)                            | Acc (%)                            | F1 (%)                             | Recall (%)                         | AUC (%)                            |
| SSVEP         | EEGNet             | 89.16 $\pm$ 0.57                   | 89.16 $\pm$ 0.55 | 89.16 $\pm$ 0.57                   | 99.72 $\pm$ 0.04                   | 81.09 $\pm$ 9.16                   | 81.58 $\pm$ 8.21                   | 81.09 $\pm$ 9.16                   | 98.75 $\pm$ 1.35                   |
|               | MultiDiffNet       | 85.08 $\pm$ 1.53                   | 84.95 $\pm$ 1.66 | 85.08 $\pm$ 1.53                   | 99.37 $\pm$ 0.05                   | <b>84.72 <math>\pm</math> 6.04</b> | <b>84.44 <math>\pm</math> 6.21</b> | <b>84.72 <math>\pm</math> 6.04</b> | <b>98.90 <math>\pm</math> 0.76</b> |
|               | MultiDiffNet +     | 86.79 $\pm$ 1.75                   | 86.00 $\pm$ 0.00 | 86.00 $\pm$ 0.00                   | 99.00 $\pm$ 0.00                   | 85.26 $\pm$ 6.94                   | 83.00 $\pm$ 0.07                   | 83.00 $\pm$ 0.07                   | 99.00 $\pm$ 0.01                   |
|               | Temp. Masked Mixup |                                    |                  |                                    |                                    |                                    |                                    |                                    |                                    |
| P300          | EEGNet             | 88.79 $\pm$ 0.68                   | 78.09 $\pm$ 1.73 | 76.03 $\pm$ 1.99                   | 89.43 $\pm$ 1.06                   | 87.24 $\pm$ 2.01                   | 73.72 $\pm$ 5.30                   | 71.40 $\pm$ 5.69                   | 85.97 $\pm$ 4.19                   |
|               | MultiDiffNet       | 85.24 $\pm$ 1.02                   | 63.06 $\pm$ 5.33 | 60.79 $\pm$ 4.04                   | 77.54 $\pm$ 4.84                   | 76.26 $\pm$ 3.61                   | 62.80 $\pm$ 3.19                   | 64.95 $\pm$ 2.86                   | 71.71 $\pm$ 4.68                   |
| MI            | EEGNet             | 64.09 $\pm$ 5.77                   | 63.62 $\pm$ 5.79 | 64.09 $\pm$ 5.77                   | 87.09 $\pm$ 3.11                   | 43.89 $\pm$ 8.33                   | 42.57 $\pm$ 8.35                   | 43.89 $\pm$ 8.33                   | 71.95 $\pm$ 7.51                   |
|               | MultiDiffNet       | 59.03 $\pm$ 6.73                   | 57.12 $\pm$ 7.83 | 59.03 $\pm$ 6.73                   | 83.05 $\pm$ 2.97                   | 40.25 $\pm$ 4.63                   | 38.82 $\pm$ 4.72                   | 40.25 $\pm$ 4.63                   | 68.06 $\pm$ 4.98                   |
| Imag. Speech  | EEGNet             | 11.26 $\pm$ 2.01                   | 11.19 $\pm$ 1.98 | 11.26 $\pm$ 2.02                   | 52.02 $\pm$ 0.42                   | 10.61 $\pm$ 0.93                   | 10.17 $\pm$ 0.75                   | 10.61 $\pm$ 0.93                   | 50.33 $\pm$ 1.25                   |
|               | MultiDiffNet       | <b>15.55 <math>\pm</math> 0.62</b> | 9.61 $\pm$ 1.23  | <b>15.53 <math>\pm</math> 0.62</b> | <b>71.24 <math>\pm</math> 1.66</b> | <b>11.62 <math>\pm</math> 1.29</b> | 7.84 $\pm$ 1.32                    | <b>11.62 <math>\pm</math> 1.29</b> | <b>57.15 <math>\pm</math> 3.18</b> |

Accuracy (mean  $\pm$  std) reported separately for both seen-subject (intra-subject) and unseen-subject (cross-subject) test splits. Tasks are ranked by task difficulty.

### 85 3 Complete ablation studies

#### 86 3.1 Decoder input ablations

Table 2: Ablation study of decoder input combinations for *MultiDiffNet*

| Decoder Input     | SSVEP               |                     | P300                |                     | Motor Imagery       |                     | Imagined Speech     |                     |
|-------------------|---------------------|---------------------|---------------------|---------------------|---------------------|---------------------|---------------------|---------------------|
|                   | Seen                | Unseen              | Seen                | Unseen              | Seen                | Unseen              | Seen                | Unseen              |
| x + x_hat + skips | <b>85.86 ± 0.38</b> | 83.12 ± 6.90        | 85.07 ± 1.03        | 79.15 ± 3.73        | 53.08 ± 4.68        | 38.74 ± 6.58        | 17.07 ± 1.86        | 12.37 ± 2.79        |
| x + x_hat         | 85.16 ± 0.95        | 84.40 ± 6.22        | 85.62 ± 0.43        | 78.59 ± 1.56        | 54.56 ± 1.83        | 40.13 ± 8.25        | <b>18.58 ± 2.13</b> | 10.48 ± 2.87        |
| x + skips         | 85.63 ± 0.29        | 81.73 ± 7.29        | 85.75 ± 0.09        | 77.93 ± 1.43        | 54.66 ± 2.58        | <b>40.36 ± 7.30</b> | 17.32 ± 1.40        | 11.74 ± 2.42        |
| x_hat + skips     | 85.70 ± 0.14        | 83.55 ± 7.93        | 85.60 ± 0.57        | <b>81.41 ± 0.98</b> | 54.27 ± 2.88        | 40.31 ± 7.48        | 17.19 ± 0.47        | 12.50 ± 1.72        |
| skips only        | 84.03 ± 1.33        | 82.59 ± 4.69        | 84.53 ± 0.82        | 75.52 ± 4.93        | 53.77 ± 2.80        | 37.33 ± 6.58        | 17.70 ± 2.30        | 11.11 ± 2.24        |
| z only            | 85.08 ± 1.53        | <b>84.72 ± 6.04</b> | 85.35 ± 1.12        | 79.47 ± 0.54        | 55.85 ± 2.80        | 39.24 ± 7.95        | 15.55 ± 0.62        | 11.62 ± 1.29        |
| z + x             | 84.89 ± 0.55        | 82.05 ± 6.57        | 85.42 ± 0.09        | 79.07 ± 3.97        | <b>56.89 ± 2.92</b> | 40.02 ± 7.01        | 18.08 ± 1.74        | 10.86 ± 2.81        |
| z + x_hat         | 85.16 ± 0.22        | 82.59 ± 8.17        | <b>85.88 ± 0.38</b> | 79.47 ± 0.64        | 55.61 ± 3.04        | 39.64 ± 6.02        | 17.57 ± 0.37        | <b>12.88 ± 1.07</b> |
| z + skips         | 85.31 ± 0.59        | 83.55 ± 5.60        | 85.79 ± 0.66        | 79.09 ± 5.66        | 52.08 ± 3.04        | 37.01 ± 5.67        | 17.83 ± 1.09        | 10.23 ± 1.93        |

Accuracy (mean ± std) reported separately for seen- and unseen-subject test splits across four tasks.

Table 3: Ablation study of decoder input combinations for *MultiDiffNet* in the ssvep task

| Configuration     | SSVEP (Seen)        |                     |                     |                     | SSVEP (Unseen)      |                     |                     |                     |
|-------------------|---------------------|---------------------|---------------------|---------------------|---------------------|---------------------|---------------------|---------------------|
|                   | Acc (%)             | F1 (%)              | Recall (%)          | AUC (%)             | Acc (%)             | F1 (%)              | Recall (%)          | AUC (%)             |
| x + x_hat + skips | <b>85.86 ± 0.38</b> | <b>85.84 ± 0.40</b> | <b>85.86 ± 0.38</b> | <b>99.50 ± 0.03</b> | 83.12 ± 6.91        | 82.85 ± 6.92        | 83.12 ± 6.91        | 98.79 ± 0.94        |
| x + x_hat         | 85.16 ± 0.95        | 85.14 ± 0.96        | 85.16 ± 0.95        | 99.40 ± 0.06        | 84.40 ± 6.22        | 84.14 ± 6.36        | 84.40 ± 6.22        | <b>98.94 ± 0.80</b> |
| x_hat + skips     | 85.70 ± 0.15        | 85.67 ± 0.14        | 85.70 ± 0.15        | 99.45 ± 0.01        | 83.55 ± 7.93        | 83.33 ± 8.13        | 83.55 ± 7.93        | 98.92 ± 0.84        |
| x + skips         | 85.63 ± 0.29        | 85.61 ± 0.32        | 85.63 ± 0.29        | 99.40 ± 0.03        | 81.73 ± 7.29        | 81.52 ± 7.44        | 81.73 ± 7.29        | 98.85 ± 0.95        |
| skips             | 84.03 ± 1.33        | 83.86 ± 1.46        | 84.03 ± 1.33        | 99.41 ± 0.02        | 82.59 ± 4.69        | 82.22 ± 4.66        | 82.59 ± 4.69        | 98.80 ± 0.91        |
| z only            | 85.08 ± 1.53        | 84.95 ± 1.66        | 85.08 ± 1.53        | 99.37 ± 0.05        | <b>84.72 ± 6.04</b> | <b>84.44 ± 6.21</b> | <b>84.72 ± 6.04</b> | 98.90 ± 0.76        |
| z + x             | 84.89 ± 0.55        | 84.88 ± 0.63        | 84.89 ± 0.55        | 99.45 ± 0.08        | 82.05 ± 6.57        | 81.93 ± 6.55        | 82.05 ± 6.57        | 98.81 ± 0.87        |
| z + x_hat         | 85.16 ± 0.22        | 85.12 ± 0.15        | 85.16 ± 0.22        | 99.45 ± 0.07        | 82.59 ± 8.17        | 82.39 ± 8.37        | 82.59 ± 8.17        | 98.69 ± 0.95        |
| z + skips         | 85.31 ± 0.59        | 85.28 ± 0.64        | 85.31 ± 0.59        | 99.48 ± 0.03        | 83.55 ± 5.60        | 83.10 ± 5.65        | 83.55 ± 5.60        | 98.82 ± 0.82        |

Mean±std is reported separately for Accuracy, F1, Recall, and AUC on seen- and unseen-subject test splits across four tasks.

Table 4: Ablation study of decoder input combinations for *MultiDiffNet* in the P300 task

| Configuration     | P300 (Seen)         |                     |                     |                     | P300 (Unseen)       |                     |                     |                     |
|-------------------|---------------------|---------------------|---------------------|---------------------|---------------------|---------------------|---------------------|---------------------|
|                   | Acc (%)             | F1 (%)              | Recall (%)          | AUC (%)             | Acc (%)             | F1 (%)              | Recall (%)          | AUC (%)             |
| x + x_hat + skips | 85.07 ± 1.03        | <b>67.21 ± 1.80</b> | <b>64.55 ± 1.39</b> | 77.87 ± 2.81        | 79.15 ± 3.73        | 63.75 ± 4.99        | 64.99 ± 6.27        | 71.06 ± 7.65        |
| x + x_hat         | 85.62 ± 0.43        | 64.19 ± 2.47        | 61.38 ± 1.99        | 77.86 ± 2.52        | 78.59 ± 1.56        | 63.56 ± 3.74        | 64.68 ± 4.86        | 71.54 ± 5.86        |
| x_hat + skips     | 85.60 ± 0.57        | 65.95 ± 1.10        | 63.00 ± 1.28        | <b>79.70 ± 0.77</b> | <b>81.41 ± 0.98</b> | 64.91 ± 4.68        | 64.99 ± 6.23        | <b>72.75 ± 7.16</b> |
| x + skips         | 85.75 ± 0.09        | 65.96 ± 0.60        | 62.87 ± 0.57        | 79.66 ± 1.29        | 77.93 ± 1.43        | 62.76 ± 1.61        | 64.23 ± 3.87        | 70.32 ± 2.97        |
| skips             | 84.53 ± 0.82        | 65.14 ± 0.95        | 62.79 ± 1.48        | 77.33 ± 1.39        | 75.52 ± 4.93        | 62.34 ± 4.91        | 64.58 ± 4.17        | 69.91 ± 6.11        |
| z only            | 85.35 ± 1.12        | 64.39 ± 4.95        | 61.88 ± 4.10        | 77.14 ± 4.35        | 79.47 ± 0.54        | 63.67 ± 1.58        | 63.95 ± 1.86        | 70.79 ± 3.27        |
| z + x             | 85.42 ± 0.09        | 62.70 ± 1.63        | 60.17 ± 1.34        | 75.48 ± 2.57        | 79.07 ± 3.97        | 63.93 ± 5.15        | 64.33 ± 4.48        | 70.53 ± 5.68        |
| z + x_hat         | <b>85.88 ± 0.38</b> | 63.44 ± 1.79        | 60.60 ± 1.37        | 76.94 ± 3.20        | 79.47 ± 0.64        | <b>65.01 ± 3.74</b> | <b>66.48 ± 5.47</b> | 72.36 ± 5.08        |
| z + skips         | 85.79 ± 0.66        | 65.02 ± 2.72        | 62.05 ± 2.19        | 78.77 ± 2.18        | 79.09 ± 5.66        | 64.69 ± 5.87        | 65.70 ± 5.82        | 71.68 ± 7.35        |

Mean±std is reported separately for Accuracy, F1, Recall, and AUC on seen- and unseen-subject test splits across four tasks.

Table 5: Ablation study of decoder input combinations for *MultiDiffNet* in the MI task

| Configuration     | MI (Seen)           |                     |                     |                     | MI (Unseen)         |                     |                     |                     |
|-------------------|---------------------|---------------------|---------------------|---------------------|---------------------|---------------------|---------------------|---------------------|
|                   | Acc (%)             | F1 (%)              | Recall (%)          | AUC (%)             | Acc (%)             | F1 (%)              | Recall (%)          | AUC (%)             |
| x + x.hat + skips | 53.08 ± 4.68        | 48.79 ± 5.69        | 53.08 ± 4.68        | 80.78 ± 4.91        | 38.74 ± 6.58        | 37.74 ± 6.87        | 38.74 ± 6.58        | 65.41 ± 6.77        |
| x + x.hat         | 54.56 ± 1.83        | 52.83 ± 1.61        | 54.56 ± 1.83        | 83.00 ± 0.71        | 40.13 ± 8.25        | 38.69 ± 8.47        | 40.13 ± 8.25        | 66.58 ± 6.26        |
| x.hat + skips     | 54.27 ± 2.88        | 52.66 ± 4.08        | 54.27 ± 2.88        | 81.45 ± 1.68        | 40.31 ± 7.48        | 39.13 ± 7.91        | 40.31 ± 7.48        | 66.60 ± 6.85        |
| x + skips         | 54.66 ± 2.58        | 52.09 ± 4.13        | 54.66 ± 2.58        | 82.00 ± 1.47        | <b>40.36 ± 7.30</b> | 39.25 ± 7.58        | <b>40.36 ± 7.30</b> | 66.33 ± 6.98        |
| skips             | 53.77 ± 2.80        | 51.12 ± 3.68        | 53.77 ± 2.80        | <b>83.80 ± 1.37</b> | 37.33 ± 6.58        | 36.21 ± 7.14        | 37.33 ± 6.58        | 63.85 ± 5.14        |
| z only            | 55.85 ± 2.80        | 54.25 ± 3.15        | 55.85 ± 2.80        | 82.72 ± 0.86        | 39.24 ± 7.95        | 38.07 ± 7.86        | 39.24 ± 7.95        | <b>66.70 ± 7.32</b> |
| z + x             | <b>56.89 ± 2.92</b> | <b>54.60 ± 4.39</b> | <b>56.89 ± 2.92</b> | 83.41 ± 1.95        | 40.02 ± 7.01        | <b>39.41 ± 7.09</b> | 40.02 ± 7.01        | 65.69 ± 6.78        |
| z + x.hat         | 55.61 ± 3.04        | 53.07 ± 4.23        | 55.61 ± 3.04        | 82.65 ± 1.04        | 39.64 ± 6.02        | 38.78 ± 5.78        | 39.64 ± 6.02        | 65.44 ± 5.60        |
| z + skips         | 52.08 ± 3.04        | 47.78 ± 3.57        | 52.08 ± 3.04        | 82.62 ± 1.66        | 37.01 ± 5.67        | 35.56 ± 6.21        | 37.01 ± 5.67        | 64.71 ± 6.48        |

Mean±std is reported separately for Accuracy, F1, Recall, and AUC on seen- and unseen-subject test splits across four tasks.

Ablation study of decoder input combinations for *MultiDiffNet* in the imagined speech task

| Configuration     | Imag. Speech (Seen) |                     |                     |                     | Imag. Speech (Unseen) |                    |                     |                     |
|-------------------|---------------------|---------------------|---------------------|---------------------|-----------------------|--------------------|---------------------|---------------------|
|                   | Acc (%)             | F1 (%)              | Recall (%)          | AUC (%)             | Acc (%)               | F1 (%)             | Recall (%)          | AUC (%)             |
| x + x.hat + skips | 17.07 ± 1.86        | 13.35 ± 2.60        | 17.05 ± 1.86        | 71.15 ± 3.16        | 12.37 ± 2.79          | 9.76 ± 2.17        | 12.37 ± 2.79        | 57.98 ± 4.50        |
| x + x.hat         | <b>18.58 ± 2.13</b> | 13.39 ± 2.72        | <b>18.56 ± 2.14</b> | 72.58 ± 1.68        | 10.48 ± 2.87          | 7.63 ± 0.81        | 10.48 ± 2.87        | 56.64 ± 6.04        |
| x.hat + skips     | 17.19 ± 0.47        | 12.90 ± 1.56        | 17.17 ± 0.47        | <b>73.16 ± 0.59</b> | 12.50 ± 1.72          | 9.02 ± 0.18        | 12.50 ± 1.72        | 56.86 ± 4.74        |
| x + skips         | 17.32 ± 1.40        | 13.92 ± 1.93        | 17.30 ± 1.39        | 71.93 ± 2.02        | 11.74 ± 2.42          | 8.57 ± 1.97        | 11.74 ± 2.42        | 56.47 ± 3.87        |
| skips             | 17.70 ± 2.30        | 12.91 ± 2.52        | 17.68 ± 2.32        | 72.61 ± 1.56        | 11.11 ± 2.24          | 9.59 ± 2.13        | 11.11 ± 2.24        | 56.24 ± 2.03        |
| z only            | 15.55 ± 0.62        | 9.61 ± 1.23         | 15.53 ± 0.62        | 71.24 ± 1.66        | 11.62 ± 1.29          | 7.84 ± 1.32        | 11.62 ± 1.29        | 57.15 ± 3.18        |
| z + x             | 18.08 ± 1.74        | <b>14.40 ± 1.08</b> | 18.06 ± 1.76        | 73.08 ± 0.57        | 10.86 ± 2.81          | 8.50 ± 1.39        | 10.86 ± 2.81        | 55.71 ± 3.62        |
| z + x.hat         | 17.57 ± 0.37        | 11.16 ± 0.56        | 17.56 ± 0.37        | 72.45 ± 1.27        | <b>12.88 ± 1.07</b>   | <b>8.16 ± 0.48</b> | <b>12.88 ± 1.07</b> | <b>58.78 ± 1.31</b> |
| z + skips         | 17.83 ± 1.09        | 13.25 ± 1.09        | 17.80 ± 1.07        | 72.86 ± 0.78        | 10.23 ± 1.93          | 7.72 ± 0.59        | 10.23 ± 1.93        | 55.81 ± 4.16        |

Mean±std is reported separately for Accuracy, F1, Recall, and AUC on seen- and unseen-subject test splits across four tasks.

Table 6: Ablation study of classifier variants

| Classifier Variant | SSVEP               |                     | P300                |                     | Motor Imagery       |                     | Imagined Speech     |                     |
|--------------------|---------------------|---------------------|---------------------|---------------------|---------------------|---------------------|---------------------|---------------------|
|                    | Seen                | Unseen              | Seen                | Unseen              | Seen                | Unseen              | Seen                | Unseen              |
| x → EEGNet         | <b>89.16 ± 0.57</b> | <b>81.09 ± 9.16</b> | <b>88.79 ± 0.68</b> | <b>87.24 ± 2.01</b> | <b>67.01 ± 5.38</b> | <b>46.18 ± 7.21</b> | 11.26 ± 2.01        | 10.61 ± 0.93        |
| x.hat → EEGNet     | 10.61 ± 4.96        | 9.19 ± 7.57         | 79.18 ± 1.32        | 79.08 ± 1.49        | 26.63 ± 0.21        | 25.84 ± 0.43        | 9.86 ± 3.27         | 7.70 ± 1.09         |
| deco.out → EEGNet  | 80.22 ± 0.99        | 70.62 ± 6.38        | 84.29 ± 0.77        | 83.52 ± 1.07        | 52.63 ± 3.56        | 35.16 ± 5.48        | <b>16.94 ± 1.28</b> | <b>10.73 ± 1.59</b> |
| x → FC             | 10.72 ± 2.01        | 11.43 ± 5.31        | 83.30 ± 0.05        | 83.33 ± 0.00        | 47.12 ± 0.92        | 29.48 ± 2.58        | 16.94 ± 1.97        | 8.71 ± 0.93         |
| x.hat → FC         | 3.73 ± 0.25         | 4.06 ± 0.54         | 83.33 ± 0.00        | 83.33 ± 0.00        | 25.30 ± 0.42        | 24.77 ± 0.33        | 10.62 ± 0.02        | 8.96 ± 0.94         |
| deco.out → FC      | 77.62 ± 1.44        | 69.55 ± 6.77        | 85.10 ± 0.35        | 84.11 ± 1.01        | 50.64 ± 2.08        | 33.74 ± 4.12        | <b>17.95 ± 1.39</b> | 8.71 ± 1.07         |
| z → FC             | <b>85.08 ± 1.53</b> | <b>84.72 ± 6.04</b> | <b>85.35 ± 0.35</b> | <b>84.12 ± 1.01</b> | <b>55.85 ± 2.80</b> | <b>39.24 ± 7.95</b> | 15.55 ± 0.62        | <b>11.61 ± 1.29</b> |

Accuracy (mean ± std) reported separately for seen- and unseen-subject test splits across four tasks.

Table 7: Ablation study of classifier\_variant and classifier\_input combinations on the SSVEP task

| Configuration      | SSVEP (Seen)        |                     |                     |                     | SSVEP (Unseen)      |                     |                     |                     |
|--------------------|---------------------|---------------------|---------------------|---------------------|---------------------|---------------------|---------------------|---------------------|
|                    | Acc (%)             | F1 (%)              | Recall (%)          | AUC (%)             | Acc (%)             | F1 (%)              | Recall (%)          | AUC (%)             |
| eegn.clsf_x        | <b>89.16 ± 0.57</b> | <b>89.16 ± 0.55</b> | <b>89.16 ± 0.57</b> | <b>99.72 ± 0.04</b> | 81.09 ± 9.16        | 81.58 ± 8.21        | 81.09 ± 9.16        | 98.75 ± 1.35        |
| eegn.clsf_x.hat    | 10.61 ± 4.96        | 8.73 ± 4.32         | 10.61 ± 4.96        | 59.86 ± 5.14        | 9.19 ± 7.57         | 8.15 ± 6.91         | 9.19 ± 7.57         | 59.39 ± 8.07        |
| eegn.clsf_deco.out | 80.23 ± 0.99        | 80.19 ± 1.01        | 80.23 ± 0.99        | 99.35 ± 0.03        | 70.62 ± 6.38        | 69.69 ± 6.48        | 70.62 ± 6.38        | 98.21 ± 1.26        |
| fc.clsf_x          | 10.72 ± 2.01        | 8.91 ± 1.93         | 10.72 ± 2.01        | 73.43 ± 3.35        | 11.43 ± 5.31        | 9.63 ± 5.44         | 11.43 ± 5.31        | 70.57 ± 5.03        |
| fc.clsf_x.hat      | 3.73 ± 0.25         | 0.68 ± 0.30         | 3.73 ± 0.25         | 49.74 ± 0.48        | 4.06 ± 0.54         | 1.17 ± 0.32         | 4.06 ± 0.54         | 49.43 ± 1.77        |
| fc.clsf_deco.out   | 77.62 ± 1.44        | 77.49 ± 1.59        | 77.62 ± 1.44        | 99.25 ± 0.06        | 69.55 ± 6.77        | 69.56 ± 6.81        | 69.55 ± 6.77        | 98.03 ± 1.17        |
| fc.clsf_z          | 85.08 ± 1.53        | 84.95 ± 1.66        | 85.08 ± 1.53        | 99.37 ± 0.05        | <b>84.72 ± 6.04</b> | <b>84.44 ± 6.21</b> | <b>84.72 ± 6.04</b> | <b>98.90 ± 0.76</b> |

Mean±std is reported separately for Accuracy, F1, Recall, and AUC on both seen- and unseen-subject test splits. Results are averaged across four tasks (“eegn” = EEGNet, “clsf” = classifier, “deco” = decoder).

Table 8: Ablation study of classifier\_variant, and classifier\_input combinations in the P300 task

| Configuration      | P300 (Seen)         |                     |                     |                     | P300 (Unseen)       |                     |                     |                     |
|--------------------|---------------------|---------------------|---------------------|---------------------|---------------------|---------------------|---------------------|---------------------|
|                    | Acc (%)             | F1 (%)              | Recall (%)          | AUC (%)             | Acc (%)             | F1 (%)              | Recall (%)          | AUC (%)             |
| eegn.clsf_x        | <b>88.79 ± 0.68</b> | <b>78.09 ± 1.73</b> | <b>76.03 ± 1.99</b> | <b>89.43 ± 1.06</b> | <b>87.24 ± 2.01</b> | <b>73.72 ± 5.30</b> | <b>71.40 ± 5.69</b> | <b>85.97 ± 4.19</b> |
| eegn.clsf_x.hat    | 79.18 ± 1.32        | 48.09 ± 2.56        | 49.70 ± 1.82        | 46.94 ± 8.58        | 79.08 ± 1.49        | 47.72 ± 1.89        | 49.41 ± 1.50        | 45.95 ± 6.80        |
| eegn.clsf_deco.out | 84.29 ± 0.77        | 56.01 ± 7.51        | 56.08 ± 4.34        | 66.90 ± 12.00       | 83.52 ± 1.07        | 54.02 ± 8.11        | 54.95 ± 5.26        | 64.43 ± 9.42        |
| fc.clsf_x          | 83.30 ± 0.05        | 45.50 ± 0.06        | 50.00 ± 0.00        | 50.08 ± 0.23        | 83.33 ± 0.00        | 45.45 ± 0.00        | 50.00 ± 0.00        | 50.32 ± 0.38        |
| fc.clsf_x.hat      | 83.33 ± 0.00        | 45.45 ± 0.00        | 50.00 ± 0.00        | 49.85 ± 0.50        | 83.33 ± 0.00        | 45.45 ± 0.00        | 50.00 ± 0.00        | 50.31 ± 0.30        |
| fc.clsf_deco.out   | 85.10 ± 0.35        | 60.43 ± 2.05        | 58.48 ± 1.48        | 74.88 ± 2.73        | 84.12 ± 1.01        | 56.01 ± 5.84        | 55.80 ± 3.95        | 70.24 ± 6.64        |
| fc.clsf_z          | 85.35 ± 1.12        | 64.39 ± 4.95        | 61.88 ± 4.10        | 77.14 ± 4.35        | 79.47 ± 0.54        | 63.67 ± 1.58        | 63.95 ± 1.86        | 70.79 ± 3.27        |

Mean±std is reported separately for Accuracy, F1, Recall, and AUC on seen- and unseen-subject test splits across four tasks (“eegn” = EEGNet, “clsf” = classifier, “deco” = decoder).



Table 9: Ablation study of `classifier_variant`, and `classifier_input` combinations in the MI task

| Configuration      | MI (Seen)           |                     |                     |                     | MI (Unseen)         |                     |                     |                     |
|--------------------|---------------------|---------------------|---------------------|---------------------|---------------------|---------------------|---------------------|---------------------|
|                    | Acc (%)             | F1 (%)              | Recall (%)          | AUC (%)             | Acc (%)             | F1 (%)              | Recall (%)          | AUC (%)             |
| eegn.clsf_x        | <b>67.01 ± 5.38</b> | <b>67.01 ± 5.39</b> | <b>67.01 ± 5.38</b> | <b>88.66 ± 3.28</b> | <b>46.18 ± 7.21</b> | <b>45.69 ± 7.30</b> | <b>46.18 ± 7.21</b> | <b>72.75 ± 5.62</b> |
| eegn.clsf_x.hat    | 26.64 ± 0.21        | 20.09 ± 3.08        | 26.64 ± 0.21        | 53.43 ± 1.52        | 25.84 ± 0.43        | 18.80 ± 4.43        | 25.84 ± 0.43        | 50.57 ± 0.75        |
| eegn.clsf_deco.out | 52.63 ± 3.56        | 51.30 ± 3.43        | 52.63 ± 3.56        | 79.26 ± 2.99        | 35.16 ± 5.48        | 31.97 ± 4.78        | 35.16 ± 5.48        | 60.71 ± 5.32        |
| fc.clsf_x          | 47.12 ± 0.92        | 46.83 ± 1.08        | 47.12 ± 0.92        | 73.82 ± 0.72        | 29.48 ± 2.59        | 26.58 ± 2.96        | 29.48 ± 2.59        | 57.16 ± 3.26        |
| fc.clsf_x.hat      | 25.30 ± 0.42        | 12.15 ± 3.04        | 25.30 ± 0.42        | 50.92 ± 1.51        | 24.77 ± 0.33        | 11.37 ± 1.93        | 24.77 ± 0.33        | 49.21 ± 1.85        |
| fc.clsf_deco.out   | 50.64 ± 2.08        | 49.99 ± 2.38        | 50.64 ± 2.08        | 76.84 ± 2.48        | 33.74 ± 4.12        | 30.64 ± 5.43        | 33.74 ± 4.12        | 60.94 ± 4.40        |
| fc.clsf_z          | 55.85 ± 2.80        | 54.25 ± 3.15        | 55.85 ± 2.80        | 82.72 ± 0.86        | 39.24 ± 7.95        | 38.07 ± 7.86        | 39.24 ± 7.95        | 66.70 ± 7.32        |

Mean±std is reported separately for Accuracy, F1, Recall, and AUC on seen- and unseen-subject test splits across four tasks (“eegn” = EEGNet, “clsf” = classifier, “deco” = decoder).

Table 10: Ablation study of `classifier_variant`, and `classifier_input` combinations in the imagined speech task

| Configuration      | Imag. Speech (Seen) |                     |                     |                     | Imag. Speech (Unseen) |                     |                     |                     |
|--------------------|---------------------|---------------------|---------------------|---------------------|-----------------------|---------------------|---------------------|---------------------|
|                    | Acc (%)             | F1 (%)              | Recall (%)          | AUC (%)             | Acc (%)               | F1 (%)              | Recall (%)          | AUC (%)             |
| eegn.clsf_x        | 11.26 ± 2.01        | 11.19 ± 1.98        | 11.26 ± 2.02        | 52.02 ± 0.42        | 10.61 ± 0.93          | <b>10.17 ± 0.75</b> | 10.61 ± 0.93        | 50.33 ± 1.25        |
| eegn.clsf_x.hat    | 9.86 ± 3.27         | 8.82 ± 2.53         | 9.85 ± 3.27         | 50.06 ± 1.59        | 7.70 ± 1.09           | 6.15 ± 0.85         | 7.70 ± 1.09         | 49.10 ± 3.36        |
| eegn.clsf_deco.out | <b>16.94 ± 1.28</b> | <b>14.73 ± 0.81</b> | <b>16.92 ± 1.26</b> | <b>73.33 ± 0.13</b> | 10.73 ± 1.59          | 6.33 ± 1.77         | 10.73 ± 1.59        | 51.50 ± 1.99        |
| fc.clsf_x          | 16.94 ± 1.97        | 16.68 ± 1.78        | 16.93 ± 1.98        | 68.36 ± 0.93        | 8.71 ± 0.93           | 6.31 ± 0.76         | 8.71 ± 0.93         | 50.99 ± 0.69        |
| fc.clsf_x.hat      | 10.62 ± 0.02        | 4.48 ± 1.18         | 10.61 ± 0.00        | 51.62 ± 1.79        | 8.96 ± 0.94           | 3.48 ± 0.57         | 8.96 ± 0.94         | 51.20 ± 0.41        |
| fc.clsf_deco.out   | 17.95 ± 1.39        | 17.02 ± 1.18        | 17.95 ± 1.39        | 74.32 ± 0.97        | 8.71 ± 1.07           | 4.46 ± 0.35         | 8.71 ± 1.07         | 49.30 ± 1.62        |
| fc.clsf_z          | 15.55 ± 0.62        | 9.61 ± 1.23         | 15.53 ± 0.62        | 71.24 ± 1.66        | <b>11.62 ± 1.29</b>   | 7.84 ± 1.32         | <b>11.62 ± 1.29</b> | <b>57.15 ± 3.18</b> |

Mean±std is reported separately for Accuracy, F1, Recall, and AUC on seen- and unseen-subject test splits across four tasks.

Table 11: Ablation study of `ddpm_variant`, `encoder_input`, and `decoder_variant` combinations

| Configuration                | SSVEP                              |                                    | P300                               |                                    | Motor Imagery                      |                                    | Imagined Speech                    |                                    |
|------------------------------|------------------------------------|------------------------------------|------------------------------------|------------------------------------|------------------------------------|------------------------------------|------------------------------------|------------------------------------|
|                              | Seen                               | Unseen                             | Seen                               | Unseen                             | Seen                               | Unseen                             | Seen                               | Unseen                             |
| <code>u_dp-x-u_deco</code>   | 85.08 $\pm$ 1.53                   | 84.72 $\pm$ 6.04                   | 85.35 $\pm$ 1.12                   | 79.47 $\pm$ 0.54                   | <b>55.85 <math>\pm</math> 2.80</b> | 39.24 $\pm$ 7.95                   | 15.55 $\pm$ 0.62                   | 11.62 $\pm$ 1.29                   |
| <code>u_dp-x-n_deco</code>   | 85.51 $\pm$ 0.63                   | 83.55 $\pm$ 5.60                   | <b>85.71 <math>\pm</math> 0.38</b> | <b>80.93 <math>\pm</math> 1.52</b> | 53.22 $\pm$ 4.58                   | <b>40.16 <math>\pm</math> 6.17</b> | 18.71 $\pm$ 1.43                   | 10.98 $\pm$ 1.61                   |
| <code>u_dp-x_h-u_deco</code> | 6.53 $\pm$ 1.07                    | 7.58 $\pm$ 2.35                    | 80.02 $\pm$ 4.40                   | 69.43 $\pm$ 4.04                   | 25.20 $\pm$ 0.86                   | 26.04 $\pm$ 0.07                   | 8.85 $\pm$ 0.37                    | 9.47 $\pm$ 1.35                    |
| <code>u_dp-x_h-n_deco</code> | 6.72 $\pm$ 1.35                    | 7.05 $\pm$ 1.63                    | 83.11 $\pm$ 0.18                   | 66.39 $\pm$ 6.24                   | 28.12 $\pm$ 0.99                   | 26.04 $\pm$ 0.28                   | 8.97 $\pm$ 0.16                    | 8.33 $\pm$ 2.75                    |
| <code>n_dp-x-u_deco</code>   | 90.29 $\pm$ 0.29                   | 84.94 $\pm$ 8.16                   | 85.36 $\pm$ 1.28                   | 78.84 $\pm$ 5.44                   | 55.06 $\pm$ 5.31                   | 36.49 $\pm$ 2.70                   | <b>19.22 <math>\pm</math> 2.13</b> | <b>13.76 <math>\pm</math> 1.25</b> |
| <code>n_dp-x-n_deco</code>   | <b>90.95 <math>\pm</math> 0.83</b> | <b>85.58 <math>\pm</math> 6.15</b> | 85.49 $\pm$ 0.66                   | 79.46 $\pm$ 0.72                   | 53.22 $\pm$ 4.44                   | 38.54 $\pm$ 3.87                   | 19.22 $\pm$ 0.20                   | 11.36 $\pm$ 1.93                   |

Accuracy (mean  $\pm$  std) reported separately for seen/unseen-subject test splits across tasks (“dp” = `ddpm_variant`, “x\_h” = `x_hat`, “deco” = `decoder_variant`, “u” = use, “n” = not use).

Table 12: Ablation study of `ddpm_variant`, `encoder_input` and `decoder_variant` combinations in the SSVEP task

| Configuration                | SSVEP (Seen)                       |                                    |                                    |                                    | SSVEP (Unseen)                     |                                    |                                    |                                    |
|------------------------------|------------------------------------|------------------------------------|------------------------------------|------------------------------------|------------------------------------|------------------------------------|------------------------------------|------------------------------------|
|                              | Acc (%)                            | F1 (%)                             | Recall (%)                         | AUC (%)                            | Acc (%)                            | F1 (%)                             | Recall (%)                         | AUC (%)                            |
| <code>u_dp-x-u_deco</code>   | 85.08 $\pm$ 1.53                   | 84.95 $\pm$ 1.66                   | 85.08 $\pm$ 1.53                   | 99.37 $\pm$ 0.05                   | 84.72 $\pm$ 6.04                   | 84.44 $\pm$ 6.21                   | 84.72 $\pm$ 6.04                   | 98.90 $\pm$ 0.76                   |
| <code>u_dp-x-n_deco</code>   | 85.51 $\pm$ 0.63                   | 85.48 $\pm$ 0.69                   | 85.51 $\pm$ 0.63                   | 99.44 $\pm$ 0.02                   | 83.55 $\pm$ 5.60                   | 83.25 $\pm$ 6.02                   | 83.55 $\pm$ 5.60                   | 98.92 $\pm$ 0.99                   |
| <code>u_dp-x_h-u_deco</code> | 6.53 $\pm$ 1.07                    | 4.89 $\pm$ 0.91                    | 6.53 $\pm$ 1.07                    | 55.27 $\pm$ 1.84                   | 7.59 $\pm$ 2.35                    | 7.11 $\pm$ 2.35                    | 7.59 $\pm$ 2.35                    | 56.22 $\pm$ 2.99                   |
| <code>u_dp-x_h-n_deco</code> | 6.72 $\pm$ 1.35                    | 4.38 $\pm$ 1.43                    | 6.72 $\pm$ 1.35                    | 56.19 $\pm$ 3.11                   | 7.05 $\pm$ 1.63                    | 6.48 $\pm$ 1.48                    | 7.05 $\pm$ 1.63                    | 54.26 $\pm$ 2.37                   |
| <code>n_dp-x-u_deco</code>   | 90.29 $\pm$ 0.29                   | 90.36 $\pm$ 0.28                   | 90.29 $\pm$ 0.29                   | <b>99.68 <math>\pm</math> 0.04</b> | 84.94 $\pm$ 8.16                   | 84.53 $\pm$ 8.58                   | 84.94 $\pm$ 8.16                   | <b>99.11 <math>\pm</math> 0.88</b> |
| <code>n_dp-x-n_deco</code>   | <b>90.95 <math>\pm</math> 0.83</b> | <b>91.02 <math>\pm</math> 0.84</b> | <b>90.95 <math>\pm</math> 0.83</b> | 99.68 $\pm$ 0.01                   | <b>85.58 <math>\pm</math> 6.15</b> | <b>85.32 <math>\pm</math> 6.37</b> | <b>85.58 <math>\pm</math> 6.15</b> | 99.07 $\pm$ 0.83                   |

Mean $\pm$ std is reported separately for Accuracy, F1, Recall, and AUC on seen- and unseen-subject test splits across four tasks (“dp” = `ddpm_variant`, “x\_h” = `x_hat`, “deco” = `decoder_variant`, “u” = use, “n” = not use).

Table 13: Ablation study of `ddpm_variant`, `encoder_input` and `decoder_variant` combinations in the P300 task

| Configuration                | P300 (Seen)                        |                                    |                                    |                                    | P300 (Unseen)                      |                                    |                                    |                                    |
|------------------------------|------------------------------------|------------------------------------|------------------------------------|------------------------------------|------------------------------------|------------------------------------|------------------------------------|------------------------------------|
|                              | Acc (%)                            | F1 (%)                             | Recall (%)                         | AUC (%)                            | Acc (%)                            | F1 (%)                             | Recall (%)                         | AUC (%)                            |
| <code>u_dp-x-u_deco</code>   | 85.35 $\pm$ 1.12                   | 64.39 $\pm$ 4.95                   | 61.88 $\pm$ 4.10                   | 77.14 $\pm$ 4.35                   | 79.47 $\pm$ 0.54                   | 63.67 $\pm$ 1.58                   | 63.95 $\pm$ 1.86                   | 70.79 $\pm$ 3.27                   |
| <code>u_dp-x-n_deco</code>   | <b>85.71 <math>\pm</math> 0.38</b> | 67.06 $\pm$ 2.38                   | 64.12 $\pm$ 2.35                   | <b>79.67 <math>\pm</math> 1.76</b> | <b>80.94 <math>\pm</math> 1.53</b> | 64.74 $\pm$ 5.62                   | 65.57 $\pm$ 6.99                   | 72.64 $\pm$ 7.24                   |
| <code>u_dp-x_h-u_deco</code> | 80.02 $\pm$ 4.40                   | 48.44 $\pm$ 3.74                   | 51.30 $\pm$ 1.76                   | 52.24 $\pm$ 4.16                   | 69.43 $\pm$ 4.04                   | 50.33 $\pm$ 1.63                   | 50.64 $\pm$ 1.36                   | 50.71 $\pm$ 2.41                   |
| <code>u_dp-x_h-n_deco</code> | 83.11 $\pm$ 0.18                   | 45.76 $\pm$ 0.42                   | 50.02 $\pm$ 0.11                   | 48.80 $\pm$ 1.49                   | 66.39 $\pm$ 6.24                   | 47.84 $\pm$ 2.84                   | 48.03 $\pm$ 2.67                   | 46.97 $\pm$ 3.74                   |
| <code>n_dp-x-u_deco</code>   | 85.36 $\pm$ 1.28                   | <b>68.45 <math>\pm</math> 3.02</b> | <b>66.09 <math>\pm</math> 3.16</b> | 79.59 $\pm$ 2.08                   | 78.84 $\pm$ 5.44                   | <b>65.21 <math>\pm</math> 5.06</b> | <b>66.28 <math>\pm</math> 3.31</b> | <b>73.36 <math>\pm</math> 6.13</b> |
| <code>n_dp-x-n_deco</code>   | 85.50 $\pm$ 0.66                   | 62.95 $\pm$ 4.25                   | 60.57 $\pm$ 3.45                   | 76.39 $\pm$ 3.83                   | 79.46 $\pm$ 0.72                   | 64.63 $\pm$ 2.54                   | 65.53 $\pm$ 3.49                   | 72.86 $\pm$ 3.49                   |

Mean $\pm$ std is reported separately for Accuracy, F1, Recall, and AUC on seen- and unseen-subject test splits across four tasks (“dp” = `ddpm_variant`, “x\_h” = `x_hat`, “deco” = `decoder_variant`, “u” = use, “n” = not use).

Table 14: Ablation study of `ddpm_variant`, `encoder_input` and `decoder_variant` combinations in the MI task

| Configuration                | MI (Seen)           |                     |                     |                     | MI (Unseen)         |                     |                     |                     |
|------------------------------|---------------------|---------------------|---------------------|---------------------|---------------------|---------------------|---------------------|---------------------|
|                              | Acc (%)             | F1 (%)              | Recall (%)          | AUC (%)             | Acc (%)             | F1 (%)              | Recall (%)          | AUC (%)             |
| <code>u_dp_x_u_deco</code>   | <b>55.85 ± 2.80</b> | <b>54.25 ± 3.15</b> | <b>55.85 ± 2.80</b> | <b>82.72 ± 0.86</b> | 39.24 ± 7.95        | <b>38.07 ± 7.86</b> | 39.24 ± 7.95        | <b>66.70 ± 7.32</b> |
| <code>u_dp_x_n_deco</code>   | 53.22 ± 4.58        | 51.30 ± 5.58        | 53.22 ± 4.58        | 81.97 ± 1.51        | <b>40.16 ± 6.18</b> | 37.50 ± 4.49        | <b>40.16 ± 6.18</b> | 65.69 ± 6.26        |
| <code>u_dp_x_h_u_deco</code> | 25.20 ± 0.86        | 16.31 ± 1.77        | 25.20 ± 0.86        | 51.24 ± 0.50        | 26.04 ± 0.07        | 22.09 ± 1.31        | 26.04 ± 0.07        | 49.78 ± 0.32        |
| <code>u_dp_x_h_n_deco</code> | 28.12 ± 0.99        | 23.52 ± 3.09        | 28.12 ± 0.99        | 52.46 ± 0.57        | 26.04 ± 0.28        | 19.57 ± 1.42        | 26.04 ± 0.28        | 53.04 ± 2.04        |
| <code>n_dp_x_u_deco</code>   | 55.06 ± 5.31        | 52.65 ± 8.20        | 55.06 ± 5.31        | 81.31 ± 5.04        | 36.49 ± 2.70        | 35.02 ± 2.24        | 36.49 ± 2.70        | 62.69 ± 2.92        |
| <code>n_dp_x_n_deco</code>   | 53.22 ± 4.44        | 50.50 ± 5.52        | 53.22 ± 4.44        | 81.79 ± 1.09        | 38.54 ± 3.87        | 36.72 ± 3.79        | 38.54 ± 3.87        | 64.42 ± 4.25        |

Mean±std is reported separately for Accuracy, F1, Recall, and AUC on seen- and unseen-subject test splits across four tasks (“dp” = `ddpm_variant`, “x\_h” = `x_hat`, “deco” = `decoder_variant`, “u” = use, “n” = not use).

Table 15: Ablation study of `ddpm_variant`, `encoder_input` and `decoder_variant` combinations in the imagined speech task

| Configuration                | Imag. Speech (Seen) |                     |                     |                     | Imag. Speech (Unseen) |                     |                     |                     |
|------------------------------|---------------------|---------------------|---------------------|---------------------|-----------------------|---------------------|---------------------|---------------------|
|                              | Acc (%)             | F1 (%)              | Recall (%)          | AUC (%)             | Acc (%)               | F1 (%)              | Recall (%)          | AUC (%)             |
| <code>u_dp_x_u_deco</code>   | 15.55 ± 0.62        | 9.61 ± 1.23         | 15.53 ± 0.62        | 71.24 ± 1.66        | 11.62 ± 1.29          | 7.84 ± 1.32         | 11.62 ± 1.29        | 57.15 ± 3.18        |
| <code>u_dp_x_n_deco</code>   | 18.71 ± 1.43        | 13.92 ± 2.57        | 18.69 ± 1.46        | 72.81 ± 0.13        | 10.98 ± 1.61          | 8.06 ± 0.55         | 10.98 ± 1.61        | 56.99 ± 4.34        |
| <code>u_dp_x_h_u_deco</code> | 8.85 ± 0.37         | 1.72 ± 0.28         | 8.84 ± 0.36         | 51.77 ± 1.23        | 9.47 ± 1.35           | 7.09 ± 0.63         | 9.47 ± 1.35         | 52.19 ± 2.60        |
| <code>u_dp_x_h_n_deco</code> | 8.98 ± 0.16         | 2.22 ± 0.99         | 8.96 ± 0.18         | 49.93 ± 0.32        | 8.33 ± 2.75           | 6.21 ± 1.83         | 8.33 ± 2.75         | 51.19 ± 3.38        |
| <code>n_dp_x_u_deco</code>   | <b>19.22 ± 2.13</b> | 14.48 ± 1.41        | <b>19.20 ± 2.11</b> | <b>74.23 ± 1.24</b> | <b>13.76 ± 1.25</b>   | <b>10.59 ± 0.42</b> | <b>13.76 ± 1.25</b> | <b>57.67 ± 3.22</b> |
| <code>n_dp_x_n_deco</code>   | 19.22 ± 0.20        | <b>14.78 ± 0.77</b> | 19.19 ± 0.18        | 73.51 ± 1.08        | 11.36 ± 1.93          | 7.95 ± 2.65         | 11.36 ± 1.93        | 54.54 ± 0.85        |

Mean±std is reported separately for Accuracy, F1, Recall, and AUC on seen- and unseen-subject test splits across four tasks (“dp” = `ddpm_variant`, “x\_h” = `x_hat`, “deco” = `decoder_variant`, “u” = use, “n” = not use).

Table 16: Ablation study of loss in the SSVEP task

| Configuration                               | SSVEP (Seen)        |                     |                     |                     | SSVEP (Unseen)      |                     |                     |                     |
|---------------------------------------------|---------------------|---------------------|---------------------|---------------------|---------------------|---------------------|---------------------|---------------------|
|                                             | Acc (%)             | F1 (%)              | Recall (%)          | AUC (%)             | Acc (%)             | F1 (%)              | Recall (%)          | AUC (%)             |
| CE <sub>a0.5b0</sub> g0                     | 84.27 ± 1.34        | 84.20 ± 1.39        | 84.27 ± 1.34        | 99.39 ± 0.12        | 82.80 ± 5.98        | 82.45 ± 6.16        | 82.80 ± 5.98        | 98.95 ± 0.79        |
| CE <sub>a0.5b0</sub> gsched 0.2             | 84.27 ± 1.65        | 84.14 ± 1.72        | 84.27 ± 1.65        | 99.39 ± 0.13        | 81.62 ± 5.61        | 81.17 ± 5.81        | 81.62 ± 5.61        | 98.87 ± 0.81        |
| CE <sub>a0.5b0</sub> gsched 0.05g0          | 86.01 ± 0.86        | 85.99 ± 0.89        | 86.01 ± 0.86        | 99.48 ± 0.02        | 83.12 ± 5.75        | 82.68 ± 6.03        | 83.12 ± 5.75        | 98.89 ± 0.72        |
| CE <sub>a0.5b0</sub> gsched 0.05gsched 0.2  | <b>86.40 ± 0.86</b> | <b>86.36 ± 0.92</b> | <b>86.40 ± 0.86</b> | <b>99.51 ± 0.04</b> | 83.23 ± 4.69        | 82.79 ± 5.00        | 83.23 ± 4.69        | <b>99.03 ± 0.64</b> |
| CE <sub>a1b0</sub> g0                       | 83.49 ± 1.72        | 83.38 ± 1.79        | 83.49 ± 1.72        | 99.32 ± 0.06        | 84.83 ± 4.91        | 84.56 ± 5.01        | 84.83 ± 4.91        | 99.02 ± 0.73        |
| CE <sub>a1b0</sub> gsched 0.2               | 84.46 ± 0.78        | 84.33 ± 0.87        | 84.46 ± 0.78        | 99.39 ± 0.08        | 83.44 ± 5.53        | 82.93 ± 5.88        | 83.44 ± 5.53        | 98.89 ± 0.82        |
| CE <sub>a1b0</sub> gsched 0.05g0            | 85.16 ± 0.95        | 85.14 ± 0.96        | 85.16 ± 0.95        | 99.40 ± 0.06        | 84.40 ± 6.22        | 84.14 ± 6.36        | 84.40 ± 6.22        | 98.94 ± 0.80        |
| CE <sub>a1b0</sub> gsched 0.05gsched 0.2    | 85.08 ± 1.53        | 84.95 ± 1.66        | 85.08 ± 1.53        | 99.37 ± 0.05        | 84.72 ± 6.04        | 84.44 ± 6.21        | 84.72 ± 6.04        | 98.90 ± 0.76        |
| MSE <sub>a0.5b0</sub> g0                    | 85.39 ± 0.68        | 85.18 ± 0.90        | 85.39 ± 0.68        | 98.49 ± 0.10        | <b>85.58 ± 8.39</b> | <b>85.49 ± 8.47</b> | <b>85.58 ± 8.39</b> | 98.19 ± 1.02        |
| MSE <sub>a0.5b0</sub> gsched 0.2            | 84.97 ± 0.62        | 84.77 ± 0.61        | 84.97 ± 0.62        | 98.20 ± 0.16        | 84.83 ± 7.03        | 84.67 ± 7.26        | 84.83 ± 7.03        | 97.60 ± 1.65        |
| MSE <sub>a0.5b0</sub> gsched 0.05g0         | 84.50 ± 0.81        | 84.52 ± 0.81        | 84.50 ± 0.81        | 97.55 ± 0.45        | 80.24 ± 5.75        | 79.88 ± 5.74        | 80.24 ± 5.75        | 96.89 ± 1.73        |
| MSE <sub>a0.5b0</sub> gsched 0.05gsched 0.2 | 85.08 ± 0.76        | 85.09 ± 0.75        | 85.08 ± 0.76        | 97.30 ± 0.37        | 81.09 ± 6.84        | 80.92 ± 6.93        | 81.09 ± 6.84        | 96.69 ± 1.10        |
| MSE <sub>a1b0</sub> g0                      | 85.66 ± 0.59        | 85.58 ± 0.68        | 85.66 ± 0.59        | 98.06 ± 0.11        | 85.26 ± 7.57        | 85.00 ± 7.62        | 85.26 ± 7.57        | 98.12 ± 1.14        |
| MSE <sub>a1b0</sub> gsched 0.2              | 85.70 ± 0.67        | 85.66 ± 0.68        | 85.70 ± 0.67        | 98.34 ± 0.12        | 84.62 ± 8.44        | 84.26 ± 8.72        | 84.62 ± 8.44        | 97.70 ± 1.60        |
| MSE <sub>a1b0</sub> gsched 0.05g0           | 86.21 ± 0.15        | 86.20 ± 0.11        | 86.21 ± 0.15        | 98.08 ± 0.27        | 83.44 ± 6.83        | 83.18 ± 6.94        | 83.44 ± 6.83        | 97.07 ± 2.09        |
| MSE <sub>a1b0</sub> gsched 0.05gsched 0.2   | 85.39 ± 0.15        | 85.37 ± 0.17        | 85.39 ± 0.15        | 98.10 ± 0.12        | 82.80 ± 6.19        | 82.48 ± 6.34        | 82.80 ± 6.19        | 97.45 ± 1.51        |

Mean±std is reported separately for Accuracy, F1, Recall, and AUC on seen- and unseen-subject test splits across four tasks ("sched" = scheduler to).

Table 17: Ablation study of loss in the P300 task

| Configuration                               | P300 (Seen)         |                     |                     |                     | P300 (Unseen)       |                     |                     |                     |
|---------------------------------------------|---------------------|---------------------|---------------------|---------------------|---------------------|---------------------|---------------------|---------------------|
|                                             | Acc (%)             | F1 (%)              | Recall (%)          | AUC (%)             | Acc (%)             | F1 (%)              | Recall (%)          | AUC (%)             |
| CE <sub>a0.5b0</sub> g0                     | 85.15 ± 1.25        | 61.34 ± 9.17        | 60.20 ± 6.39        | 72.13 ± 8.49        | 77.61 ± 5.30        | 59.52 ± 3.58        | 59.38 ± 2.61        | 66.68 ± 3.94        |
| CE <sub>a0.5b0</sub> gsched 0.2             | 84.96 ± 1.07        | 61.36 ± 8.67        | 60.18 ± 6.04        | 72.52 ± 8.40        | 77.15 ± 4.27        | 59.83 ± 3.08        | 60.14 ± 2.78        | 65.42 ± 3.51        |
| CE <sub>a0.5b0</sub> gsched 0.05g0          | 85.36 ± 1.01        | 62.19 ± 7.03        | 60.36 ± 4.98        | 76.10 ± 5.36        | 75.06 ± 2.99        | 61.63 ± 1.48        | 64.22 ± 1.48        | 70.90 ± 2.06        |
| CE <sub>a0.5b0</sub> gsched 0.05gsched 0.2  | 85.51 ± 1.09        | 65.01 ± 3.74        | 62.21 ± 3.11        | 78.48 ± 4.32        | 76.46 ± 1.12        | <b>63.76 ± 0.81</b> | <b>66.84 ± 2.65</b> | <b>73.06 ± 2.84</b> |
| CE <sub>a1b0</sub> g0                       | 84.56 ± 0.95        | 65.49 ± 2.69        | 63.26 ± 2.83        | 77.34 ± 1.00        | <b>80.18 ± 0.50</b> | 63.07 ± 3.07        | 63.13 ± 4.36        | 71.95 ± 4.05        |
| CE <sub>a1b0</sub> gsched 0.2               | 83.91 ± 1.49        | 65.53 ± 1.16        | <b>63.65 ± 1.92</b> | 75.12 ± 0.99        | 78.19 ± 3.49        | 63.21 ± 3.97        | 63.99 ± 3.60        | 70.67 ± 5.66        |
| CE <sub>a1b0</sub> gsched 0.05g0            | 85.46 ± 0.75        | <b>66.28 ± 2.44</b> | 63.42 ± 2.23        | <b>78.86 ± 2.41</b> | 79.22 ± 2.47        | 63.35 ± 3.07        | 63.66 ± 2.95        | 71.34 ± 4.79        |
| CE <sub>a1b0</sub> gsched 0.05gsched 0.2    | 85.35 ± 1.12        | 64.39 ± 4.95        | 61.88 ± 4.10        | 77.14 ± 4.35        | 79.47 ± 0.54        | 63.67 ± 1.58        | 63.95 ± 1.86        | 70.79 ± 3.27        |
| MSE <sub>a0.5b0</sub> g0                    | 84.70 ± 1.14        | 58.84 ± 9.64        | 58.44 ± 6.15        | 67.96 ± 9.11        | 67.08 ± 13.35       | 54.56 ± 7.66        | 57.93 ± 4.25        | 60.24 ± 4.85        |
| MSE <sub>a0.5b0</sub> gsched 0.2            | 83.90 ± 0.40        | 55.75 ± 7.38        | 55.99 ± 4.34        | 67.58 ± 8.14        | 63.50 ± 9.96        | 52.50 ± 6.04        | 56.70 ± 3.72        | 59.72 ± 4.79        |
| MSE <sub>a0.5b0</sub> gsched 0.05g0         | <b>85.69 ± 0.65</b> | 63.41 ± 3.27        | 60.73 ± 2.50        | 75.94 ± 2.75        | 74.81 ± 3.74        | 61.87 ± 1.89        | 65.58 ± 4.44        | 69.66 ± 5.34        |
| MSE <sub>a0.5b0</sub> gsched 0.05gsched 0.2 | 85.67 ± 0.52        | 65.01 ± 2.49        | 62.09 ± 2.09        | 75.30 ± 5.37        | 78.17 ± 1.62        | 63.36 ± 1.79        | 64.83 ± 3.56        | 68.73 ± 4.26        |
| MSE <sub>a1b0</sub> g0                      | 84.24 ± 0.69        | 58.50 ± 9.22        | 58.31 ± 5.88        | 68.51 ± 8.11        | 68.46 ± 10.36       | 54.56 ± 6.82        | 56.33 ± 5.40        | 59.00 ± 6.62        |
| MSE <sub>a1b0</sub> gsched 0.2              | 84.68 ± 0.29        | 61.65 ± 1.34        | 59.45 ± 1.03        | 71.05 ± 1.04        | 72.24 ± 2.85        | 59.71 ± 3.64        | 63.04 ± 4.17        | 67.29 ± 5.38        |
| MSE <sub>a1b0</sub> gsched 0.05g0           | 85.20 ± 1.15        | 66.12 ± 1.40        | 63.29 ± 1.00        | 75.87 ± 2.28        | 72.83 ± 2.19        | 61.17 ± 1.95        | 65.55 ± 3.36        | 69.81 ± 3.62        |
| MSE <sub>a1b0</sub> gsched 0.05gsched 0.2   | 85.31 ± 0.56        | 64.17 ± 1.70        | 61.41 ± 1.32        | 75.70 ± 3.09        | 74.35 ± 2.84        | 61.78 ± 2.66        | 65.57 ± 5.00        | 69.59 ± 5.21        |

Mean±std is reported separately for Accuracy, F1, Recall, and AUC on seen- and unseen-subject test splits across four tasks ("sched" = scheduler to).

Table 18: Ablation study of loss in the MI task

| Configuration                             | MI (Seen)           |                     |                     |                     | MI (Unseen)         |                     |                     |                     |
|-------------------------------------------|---------------------|---------------------|---------------------|---------------------|---------------------|---------------------|---------------------|---------------------|
|                                           | Acc (%)             | F1 (%)              | Recall (%)          | AUC (%)             | Acc (%)             | F1 (%)              | Recall (%)          | AUC (%)             |
| CE <sub>a0.5b0.g0</sub>                   | 51.84 ± 2.36        | 47.19 ± 3.13        | 51.84 ± 2.36        | 81.38 ± 2.42        | 39.15 ± 7.00        | 37.98 ± 6.49        | 39.15 ± 7.00        | 66.57 ± 6.63        |
| CE <sub>a0.5b0.gsched 0.2</sub>           | 53.87 ± 2.48        | 50.13 ± 3.19        | 53.87 ± 2.48        | 81.44 ± 1.65        | 39.99 ± 6.23        | 39.21 ± 5.71        | 39.99 ± 6.23        | 66.25 ± 6.73        |
| CE <sub>a0.5bsched 0.05.g0</sub>          | 55.36 ± 2.11        | 53.21 ± 2.62        | 55.36 ± 2.11        | <b>83.07 ± 1.54</b> | 40.80 ± 6.38        | 39.21 ± 5.99        | 40.80 ± 6.38        | 67.29 ± 6.94        |
| CE <sub>a0.5bsched 0.05.gsched 0.2</sub>  | 54.76 ± 3.08        | 52.67 ± 4.43        | 54.76 ± 3.08        | 83.06 ± 1.33        | 40.48 ± 6.61        | 39.39 ± 6.28        | 40.48 ± 6.61        | <b>67.68 ± 6.98</b> |
| CE <sub>a1b0.g0</sub>                     | 52.38 ± 3.19        | 48.02 ± 3.37        | 52.38 ± 3.19        | 81.50 ± 2.66        | 39.15 ± 4.69        | 37.77 ± 4.16        | 39.15 ± 4.69        | 65.42 ± 5.19        |
| CE <sub>a1b0.gsched 0.2</sub>             | 51.44 ± 3.86        | 46.19 ± 4.98        | 51.44 ± 3.86        | 80.63 ± 3.05        | 39.18 ± 4.31        | 37.85 ± 3.56        | 39.18 ± 4.31        | 65.29 ± 5.10        |
| CE <sub>a1bsched 0.05.g0</sub>            | 54.46 ± 2.59        | 52.02 ± 3.63        | 54.46 ± 2.59        | 82.65 ± 1.20        | 40.05 ± 7.45        | 38.91 ± 7.38        | 40.05 ± 7.45        | 67.01 ± 6.95        |
| CE <sub>a1bsched 0.05.gsched 0.2</sub>    | 55.85 ± 2.80        | 54.25 ± 3.15        | 55.85 ± 2.80        | 82.72 ± 0.86        | 39.24 ± 7.95        | 38.07 ± 7.86        | 39.24 ± 7.95        | 66.70 ± 7.32        |
| MSE <sub>a0.5b0.g0</sub>                  | 53.92 ± 5.58        | 51.22 ± 8.61        | 53.92 ± 5.58        | 79.86 ± 4.12        | 37.33 ± 2.98        | 34.85 ± 1.05        | 37.33 ± 2.98        | 63.60 ± 4.09        |
| MSE <sub>a0.5b0.gsched 0.2</sub>          | 53.62 ± 5.23        | 50.63 ± 7.83        | 53.62 ± 5.23        | 79.80 ± 4.09        | 37.59 ± 2.99        | 34.90 ± 1.34        | 37.59 ± 2.99        | 63.60 ± 3.91        |
| MSE <sub>a0.5bsched 0.05.g0</sub>         | 57.74 ± 1.48        | 55.92 ± 2.94        | 57.74 ± 1.48        | 79.98 ± 2.41        | 40.89 ± 5.00        | 40.20 ± 4.83        | 40.89 ± 5.00        | 63.96 ± 3.68        |
| MSE <sub>a0.5bsched 0.05.gsched 0.2</sub> | <b>59.67 ± 1.72</b> | <b>58.45 ± 2.70</b> | <b>59.67 ± 1.72</b> | 81.22 ± 1.05        | 40.60 ± 4.03        | 39.56 ± 3.52        | 40.60 ± 4.03        | 63.57 ± 3.07        |
| MSE <sub>a1b0.g0</sub>                    | 54.07 ± 5.19        | 51.81 ± 8.05        | 54.07 ± 5.19        | 80.34 ± 3.07        | 37.30 ± 4.89        | 36.10 ± 4.59        | 37.30 ± 4.89        | 62.84 ± 5.47        |
| MSE <sub>a1b0.gsched 0.2</sub>            | 54.91 ± 5.02        | 52.24 ± 7.49        | 54.91 ± 5.02        | 81.03 ± 3.28        | 37.33 ± 4.36        | 36.21 ± 4.11        | 37.33 ± 4.36        | 63.15 ± 4.89        |
| MSE <sub>a1bsched 0.05.g0</sub>           | 57.79 ± 1.30        | 57.15 ± 1.89        | 57.79 ± 1.30        | 81.44 ± 2.13        | 39.32 ± 3.39        | 38.31 ± 2.84        | 39.32 ± 3.39        | 63.34 ± 3.57        |
| MSE <sub>a1bsched 0.05.gsched 0.2</sub>   | 59.23 ± 1.58        | 57.85 ± 3.33        | 59.23 ± 1.58        | 82.16 ± 1.11        | <b>41.44 ± 6.03</b> | <b>40.37 ± 6.26</b> | <b>41.44 ± 6.03</b> | 65.18 ± 4.76        |

Mean±std is reported separately for Accuracy, F1, Recall, and AUC on seen- and unseen-subject test splits across four tasks (“sched” = scheduler to).

Table 19: Ablation study of loss in the imagined speech task

| Configuration                             | Imag. Speech (Seen) |                     |                     |                     | Imag. Speech (Unseen) |                     |                     |                     |
|-------------------------------------------|---------------------|---------------------|---------------------|---------------------|-----------------------|---------------------|---------------------|---------------------|
|                                           | Acc                 | F1                  | Recall              | AUC                 | Acc                   | F1                  | Recall              | AUC                 |
| CE <sub>a0.5b0.g0</sub>                   | 17.83 ± 1.38        | 13.40 ± 2.54        | 17.80 ± 1.35        | 70.88 ± 1.42        | 13.26 ± 0.82          | 9.98 ± 1.14         | 13.26 ± 0.82        | 57.90 ± 2.93        |
| CE <sub>a0.5b0.gsched 0.2</sub>           | 19.09 ± 0.75        | <b>15.08 ± 0.99</b> | 19.07 ± 0.78        | 72.13 ± 1.37        | 11.99 ± 2.87          | 9.08 ± 2.30         | 11.99 ± 2.87        | <b>59.72 ± 1.83</b> |
| CE <sub>a0.5bsched 0.05.g0</sub>          | 18.46 ± 0.68        | 15.04 ± 0.64        | 18.43 ± 0.64        | 71.98 ± 0.72        | 11.24 ± 0.99          | 8.54 ± 1.38         | 11.24 ± 0.99        | 56.68 ± 3.58        |
| CE <sub>a0.5bsched 0.05.gsched 0.2</sub>  | <b>19.60 ± 1.62</b> | 13.61 ± 1.07        | <b>19.57 ± 1.59</b> | <b>73.49 ± 0.24</b> | 9.34 ± 3.16           | 5.83 ± 1.34         | 9.34 ± 3.16         | 56.33 ± 3.92        |
| CE <sub>a1b0.g0</sub>                     | 18.08 ± 1.28        | 12.39 ± 0.35        | 18.06 ± 1.25        | 72.35 ± 0.89        | 11.49 ± 1.96          | 9.18 ± 2.13         | 11.49 ± 1.96        | 59.17 ± 1.89        |
| CE <sub>a1b0.gsched 0.2</sub>             | 17.95 ± 0.70        | 13.52 ± 1.18        | 17.93 ± 0.71        | 73.07 ± 0.40        | 11.87 ± 1.53          | 8.18 ± 2.56         | 11.87 ± 1.53        | 59.12 ± 2.40        |
| CE <sub>a1bsched 0.05.g0</sub>            | 17.44 ± 1.70        | 11.50 ± 0.76        | 17.42 ± 1.72        | 71.56 ± 2.03        | 12.12 ± 2.23          | 8.78 ± 1.11         | 12.12 ± 2.23        | 57.33 ± 3.33        |
| CE <sub>a1bsched 0.05.gsched 0.2</sub>    | 15.55 ± 0.62        | 9.61 ± 1.23         | 15.53 ± 0.62        | 71.24 ± 1.66        | 11.62 ± 1.29          | 7.84 ± 1.32         | 11.62 ± 1.29        | 57.15 ± 3.18        |
| MSE <sub>a0.5b0.g0</sub>                  | 16.69 ± 1.32        | 11.20 ± 0.62        | 16.67 ± 1.35        | 66.83 ± 5.71        | 11.99 ± 0.47          | 8.54 ± 1.26         | 11.99 ± 0.47        | 55.95 ± 1.92        |
| MSE <sub>a0.5b0.gsched 0.2</sub>          | 16.82 ± 1.98        | 11.22 ± 0.64        | 16.79 ± 1.96        | 64.87 ± 4.18        | 11.87 ± 1.39          | 7.68 ± 2.71         | 11.87 ± 1.39        | 54.02 ± 2.17        |
| MSE <sub>a0.5bsched 0.05.g0</sub>         | 17.19 ± 0.81        | 10.68 ± 1.75        | 17.17 ± 0.78        | 70.09 ± 5.01        | 9.60 ± 1.53           | 5.44 ± 0.55         | 9.60 ± 1.53         | 52.43 ± 4.56        |
| MSE <sub>a0.5bsched 0.05.gsched 0.2</sub> | 17.32 ± 0.80        | 12.48 ± 1.70        | 17.33 ± 0.81        | 61.80 ± 7.84        | 11.62 ± 1.17          | 8.85 ± 1.36         | 11.62 ± 1.17        | 53.32 ± 0.93        |
| MSE <sub>a1b0.g0</sub>                    | 16.43 ± 0.98        | 12.53 ± 0.65        | 16.43 ± 0.99        | 62.13 ± 5.47        | <b>13.51 ± 2.36</b>   | <b>10.05 ± 1.92</b> | <b>13.51 ± 2.36</b> | 53.55 ± 2.59        |
| MSE <sub>a1b0.gsched 0.2</sub>            | 16.06 ± 2.01        | 11.90 ± 1.40        | 16.10 ± 2.04        | 65.92 ± 4.70        | 13.26 ± 1.93          | 9.80 ± 1.77         | 13.26 ± 1.93        | 54.53 ± 1.07        |
| MSE <sub>a1bsched 0.05.g0</sub>           | 17.32 ± 1.11        | 12.89 ± 1.93        | 17.31 ± 1.11        | 61.35 ± 4.49        | 9.97 ± 2.52           | 6.64 ± 1.24         | 9.97 ± 2.52         | 50.25 ± 1.56        |
| MSE <sub>a1bsched 0.05.gsched 0.2</sub>   | 17.57 ± 0.67        | 13.19 ± 1.56        | 17.58 ± 0.68        | 61.76 ± 4.09        | 12.12 ± 2.70          | 7.66 ± 2.48         | 12.12 ± 2.70        | 48.50 ± 1.67        |

Mean±std is reported separately for Accuracy, F1, Recall, and AUC on seen- and unseen-subject test splits across four tasks (“sched” = scheduler to).

Table 20: Ablation study of mixup in the SSVEP task

| Configuration<br>(mixup layer/<br>warmup<br>epoch/<br>random ratio) | SSVEP (Seen)        |                     |                     |                     | SSVEP (Unseen)      |                     |                     |                     |
|---------------------------------------------------------------------|---------------------|---------------------|---------------------|---------------------|---------------------|---------------------|---------------------|---------------------|
|                                                                     | Acc (%)             | F1 (%)              | Recall (%)          | AUC (%)             | Acc (%)             | F1 (%)              | Recall (%)          | AUC (%)             |
| -1 / 100 / No                                                       | 86.79 ± 1.75        | 86.75 ± 1.83        | 86.79 ± 1.75        | <b>99.62 ± 0.02</b> | <b>85.26 ± 6.94</b> | 85.02 ± 7.05        | <b>85.26 ± 6.94</b> | <b>99.19 ± 0.81</b> |
| -1 / 100 / Yes                                                      | 86.75 ± 0.78        | 86.74 ± 0.78        | 86.75 ± 0.78        | 99.60 ± 0.02        | 85.15 ± 7.46        | <b>85.09 ± 7.32</b> | 85.15 ± 7.46        | 99.16 ± 0.92        |
| -1 / 150 / No                                                       | 86.87 ± 1.77        | 86.86 ± 1.81        | 86.87 ± 1.77        | 99.55 ± 0.07        | 84.40 ± 7.65        | 84.07 ± 7.87        | 84.40 ± 7.65        | 99.02 ± 1.13        |
| -1 / 150 / Yes                                                      | 86.60 ± 0.42        | 86.62 ± 0.44        | 86.60 ± 0.42        | 99.54 ± 0.07        | 84.29 ± 7.09        | 84.08 ± 7.13        | 84.29 ± 7.09        | 99.06 ± 1.09        |
| 0 / 100 / No                                                        | 86.60 ± 1.07        | 86.59 ± 1.08        | 86.60 ± 1.07        | 99.46 ± 0.13        | 84.51 ± 7.68        | 84.14 ± 7.92        | 84.51 ± 7.68        | 98.99 ± 1.12        |
| 0 / 100 / Yes                                                       | 86.60 ± 1.12        | 86.56 ± 1.09        | 86.60 ± 1.12        | 99.58 ± 0.04        | 84.72 ± 6.48        | 84.54 ± 6.51        | 84.72 ± 6.48        | 99.15 ± 0.92        |
| 0 / 150 / No                                                        | 87.36 ± 1.34        | 86.63 ± 0.54        | 86.64 ± 0.53        | 99.46 ± 0.11        | 83.65 ± 8.38        | 83.46 ± 8.44        | 83.65 ± 8.38        | 99.00 ± 1.11        |
| 0 / 150 / Yes                                                       | <b>87.84 ± 0.86</b> | <b>87.89 ± 0.83</b> | <b>87.84 ± 0.86</b> | 99.58 ± 0.01        | 85.04 ± 7.94        | 84.85 ± 8.10        | 85.04 ± 7.94        | 99.11 ± 1.05        |
| 1 / 100 / No                                                        | 85.08 ± 1.62        | 85.11 ± 1.62        | 85.08 ± 1.62        | 99.34 ± 0.13        | 84.51 ± 6.85        | 84.35 ± 6.91        | 84.51 ± 6.85        | 99.03 ± 0.97        |
| 1 / 100 / Yes                                                       | 84.65 ± 2.36        | 84.57 ± 2.55        | 84.65 ± 2.36        | 99.40 ± 0.11        | 82.69 ± 5.94        | 82.52 ± 5.95        | 82.69 ± 5.94        | 98.98 ± 0.93        |
| 1 / 150 / No                                                        | 85.47 ± 0.74        | 85.43 ± 0.82        | 85.47 ± 0.74        | 99.42 ± 0.07        | 83.33 ± 6.99        | 83.04 ± 7.16        | 83.33 ± 6.99        | 98.95 ± 1.12        |
| 1 / 150 / Yes                                                       | 85.16 ± 0.66        | 85.09 ± 0.72        | 85.16 ± 0.66        | 99.42 ± 0.07        | 83.55 ± 7.21        | 83.31 ± 7.45        | 83.55 ± 7.21        | 99.00 ± 1.16        |
| 2 / 100 / No                                                        | 85.12 ± 1.55        | 85.17 ± 1.52        | 85.12 ± 1.55        | 99.36 ± 0.12        | 84.19 ± 6.59        | 83.99 ± 6.61        | 84.19 ± 6.59        | 99.00 ± 0.95        |
| 2 / 100 / Yes                                                       | 85.12 ± 2.06        | 84.90 ± 2.59        | 85.12 ± 2.06        | 99.44 ± 0.15        | 84.40 ± 7.59        | 84.26 ± 7.71        | 84.40 ± 7.59        | 99.12 ± 0.79        |
| 2 / 150 / No                                                        | 85.47 ± 0.74        | 85.43 ± 0.82        | 85.47 ± 0.74        | 99.42 ± 0.07        | 83.33 ± 6.99        | 82.38 ± 6.55        | 83.33 ± 6.99        | 98.95 ± 1.12        |
| 2 / 150 / Yes                                                       | 84.89 ± 0.91        | 84.80 ± 0.97        | 84.89 ± 0.91        | 99.43 ± 0.05        | 83.97 ± 7.70        | 83.74 ± 7.94        | 83.97 ± 7.70        | 98.99 ± 1.15        |
| 3 / 100 / No                                                        | 84.77 ± 2.16        | 84.72 ± 2.28        | 84.77 ± 2.16        | 99.36 ± 0.12        | 83.01 ± 5.99        | 82.84 ± 6.01        | 83.01 ± 5.99        | 99.03 ± 0.97        |
| 3 / 100 / Yes                                                       | 84.65 ± 2.36        | 84.57 ± 2.55        | 84.65 ± 2.36        | 99.40 ± 0.11        | 82.69 ± 5.94        | 82.52 ± 5.95        | 82.69 ± 5.94        | 98.98 ± 0.93        |
| 3 / 150 / No                                                        | 85.47 ± 0.74        | 85.43 ± 0.82        | 85.47 ± 0.74        | 99.42 ± 0.07        | 83.33 ± 6.99        | 83.04 ± 7.16        | 83.33 ± 6.99        | 98.95 ± 1.12        |
| 3 / 150 / Yes                                                       | 85.47 ± 0.74        | 85.43 ± 0.82        | 85.47 ± 0.74        | 99.42 ± 0.07        | 83.33 ± 6.99        | 83.04 ± 7.16        | 83.33 ± 6.99        | 98.95 ± 1.12        |
| 4 / 100 / No                                                        | 85.70 ± 1.50        | 85.70 ± 1.61        | 85.70 ± 1.50        | 99.42 ± 0.13        | 83.76 ± 8.14        | 83.60 ± 8.15        | 83.76 ± 8.14        | 98.98 ± 1.07        |
| 4 / 100 / Yes                                                       | 84.85 ± 2.53        | 84.84 ± 2.78        | 84.85 ± 2.53        | 99.39 ± 0.10        | 82.26 ± 6.60        | 82.14 ± 6.54        | 82.26 ± 6.60        | 99.02 ± 0.86        |
| 4 / 150 / No                                                        | 85.78 ± 1.34        | 85.81 ± 1.44        | 85.78 ± 1.34        | 99.43 ± 0.08        | 83.23 ± 6.91        | 83.01 ± 6.78        | 83.23 ± 6.91        | 99.02 ± 1.03        |
| 4 / 150 / Yes                                                       | 85.55 ± 0.82        | 85.56 ± 0.95        | 85.55 ± 0.82        | 99.46 ± 0.11        | 83.33 ± 6.99        | 82.99 ± 7.24        | 83.33 ± 6.99        | 99.08 ± 0.91        |

Mean±std is reported separately for Accuracy, F1, Recall, and AUC on seen- and unseen-subject test splits across four tasks (mixup layer: -1 = temporal mixup at input, 0 = weighted average at input, 1/2/3 = weighted average after first/second/third encoder layer, 4 = weighted average after attention pooling. warmup epoch: number of epochs to train the generators before training the classifier. random ratio: No = equal possibility on choosing ddpn or decoder out for temporal mixup/equal weight for weighted average mixup, Yes = beta/dirichlet distribution with b=0.2 for a random ratio more heavily tilted towards one of the mixup candidates).

Table 21: Ablation study of mixup in the P300 task

| Configuration<br>(mixup layer/<br>warmup epoch/<br>epoch/ random ratio) | P300 (Seen)         |                     |                     |                     | P300 (Unseen)       |                     |                     |                     |
|-------------------------------------------------------------------------|---------------------|---------------------|---------------------|---------------------|---------------------|---------------------|---------------------|---------------------|
|                                                                         | Acc (%)             | F1 (%)              | Recall (%)          | AUC (%)             | Acc (%)             | F1 (%)              | Recall (%)          | AUC (%)             |
| -1 / 100 / No                                                           | 85.61 ± 0.52        | 67.30 ± 1.54        | 64.42 ± 2.02        | <b>80.00 ± 1.39</b> | <b>79.56 ± 4.43</b> | 65.19 ± 7.51        | 66.10 ± 7.91        | 72.72 ± 9.74        |
| -1 / 100 / Yes                                                          | 85.58 ± 0.47        | <b>67.89 ± 0.71</b> | <b>64.98 ± 0.71</b> | 79.94 ± 1.61        | 79.51 ± 4.51        | <b>65.22 ± 7.57</b> | 66.18 ± 7.97        | 73.41 ± 9.22        |
| -1 / 150 / No                                                           | 85.70 ± 0.28        | 66.38 ± 0.92        | 63.30 ± 0.84        | 78.55 ± 1.24        | 78.05 ± 6.49        | 64.40 ± 7.89        | 65.74 ± 7.33        | 71.71 ± 9.98        |
| -1 / 150 / Yes                                                          | <b>85.78 ± 0.13</b> | 66.30 ± 0.51        | 63.18 ± 0.56        | 79.05 ± 0.35        | 79.10 ± 2.04        | 64.31 ± 5.87        | 65.65 ± 7.85        | 71.52 ± 9.12        |
| 0 / 100 / No                                                            | 85.70 ± 0.44        | 66.60 ± 1.84        | 63.59 ± 1.88        | 78.87 ± 1.90        | 78.25 ± 6.85        | 64.98 ± 8.43        | 66.65 ± 8.39        | 72.34 ± 10.36       |
| 0 / 100 / Yes                                                           | 85.54 ± 0.19        | 66.38 ± 1.54        | 63.43 ± 1.47        | 79.63 ± 1.54        | 75.11 ± 5.28        | 63.41 ± 6.66        | 67.46 ± 8.57        | 73.52 ± 10.37       |
| 0 / 150 / No                                                            | <b>85.78 ± 0.41</b> | 67.00 ± 1.29        | 63.91 ± 1.27        | 78.73 ± 1.45        | 78.10 ± 6.48        | 64.64 ± 8.28        | 66.21 ± 8.24        | 72.06 ± 10.14       |
| 0 / 150 / Yes                                                           | 85.66 ± 0.25        | 66.60 ± 0.89        | 63.55 ± 0.81        | 79.48 ± 1.97        | 75.81 ± 3.96        | 63.38 ± 6.33        | 66.85 ± 8.63        | 72.89 ± 10.04       |
| 1 / 100 / No                                                            | 85.03 ± 0.33        | 62.05 ± 2.81        | 59.77 ± 2.19        | 76.15 ± 1.21        | 70.27 ± 3.61        | 59.38 ± 3.95        | 64.29 ± 4.65        | 68.67 ± 5.30        |
| 1 / 100 / Yes                                                           | 85.48 ± 0.19        | 66.53 ± 1.64        | 63.66 ± 1.84        | 79.16 ± 1.17        | 66.82 ± 3.51        | 58.12 ± 1.03        | 66.45 ± 5.63        | 72.31 ± 8.49        |
| 1 / 150 / No                                                            | 85.02 ± 0.91        | 61.30 ± 5.42        | 59.35 ± 4.08        | 74.17 ± 5.60        | 72.35 ± 3.03        | 60.51 ± 3.10        | 64.56 ± 3.92        | 69.57 ± 5.41        |
| 1 / 150 / Yes                                                           | 85.23 ± 0.99        | 64.38 ± 5.42        | 61.93 ± 4.45        | 77.76 ± 3.93        | 71.72 ± 2.41        | 60.98 ± 3.39        | 66.22 ± 4.78        | 71.21 ± 6.19        |
| 2 / 100 / No                                                            | 84.55 ± 0.97        | 57.31 ± 7.76        | 56.75 ± 4.83        | 71.05 ± 10.48       | 70.83 ± 1.12        | 58.46 ± 0.39        | 62.09 ± 1.45        | 66.24 ± 2.34        |
| 2 / 100 / Yes                                                           | 84.84 ± 0.80        | 61.74 ± 5.07        | 59.71 ± 3.79        | 76.45 ± 3.50        | 72.20 ± 1.37        | 60.54 ± 2.63        | 64.91 ± 4.27        | 70.24 ± 5.46        |
| 2 / 150 / No                                                            | 84.73 ± 0.75        | 60.25 ± 4.67        | 58.52 ± 3.42        | 74.52 ± 5.66        | 74.35 ± 0.65        | 61.03 ± 2.28        | 63.97 ± 4.40        | 68.81 ± 5.90        |
| 2 / 150 / Yes                                                           | 84.87 ± 0.79        | 62.09 ± 5.56        | 60.04 ± 4.15        | 74.71 ± 5.79        | 73.87 ± 0.18        | 61.51 ± 2.21        | 65.20 ± 4.06        | 70.76 ± 5.20        |
| 3 / 100 / No                                                            | 84.86 ± 0.44        | 61.05 ± 1.52        | 58.93 ± 1.09        | 76.08 ± 0.75        | 70.95 ± 4.27        | 60.24 ± 4.92        | 65.37 ± 5.98        | 69.56 ± 7.12        |
| 3 / 100 / Yes                                                           | 85.16 ± 0.17        | 65.07 ± 2.10        | 62.40 ± 2.02        | 78.23 ± 1.34        | 71.84 ± 6.59        | 62.04 ± 7.10        | <b>67.89 ± 7.38</b> | 73.22 ± 9.40        |
| 3 / 150 / No                                                            | 84.99 ± 0.41        | 62.08 ± 1.94        | 59.77 ± 1.62        | 76.95 ± 1.70        | 72.01 ± 4.05        | 61.35 ± 5.41        | 66.56 ± 6.89        | 71.09 ± 8.62        |
| 3 / 150 / Yes                                                           | 85.27 ± 0.45        | 62.82 ± 3.39        | 60.39 ± 2.83        | 77.27 ± 1.96        | 73.99 ± 4.67        | 62.18 ± 5.96        | 66.33 ± 7.83        | 71.19 ± 10.09       |
| 4 / 100 / No                                                            | 85.47 ± 0.11        | 65.16 ± 2.15        | 62.30 ± 1.91        | 78.26 ± 1.36        | 72.84 ± 5.44        | 62.07 ± 5.67        | 67.37 ± 7.83        | 72.55 ± 8.94        |
| 4 / 100 / Yes                                                           | 85.48 ± 0.07        | 65.64 ± 1.41        | 62.72 ± 1.34        | 79.56 ± 0.34        | 76.03 ± 0.72        | 63.23 ± 4.99        | 67.16 ± 9.38        | <b>73.91 ± 9.71</b> |
| 4 / 150 / No                                                            | 85.00 ± 0.91        | 62.81 ± 6.22        | 60.69 ± 4.74        | 75.11 ± 6.29        | 74.24 ± 2.88        | 61.90 ± 3.60        | 65.40 ± 4.55        | 71.28 ± 5.96        |
| 4 / 150 / Yes                                                           | 85.26 ± 0.59        | 64.19 ± 3.92        | 61.60 ± 3.19        | 77.58 ± 2.92        | 75.38 ± 4.29        | 62.57 ± 4.95        | 65.28 ± 4.82        | 71.59 ± 6.93        |

Mean±std is reported separately for Accuracy, F1, Recall, and AUC on seen- and unseen-subject test splits across four tasks (mixup layer: -1 = temporal mixup at input, 0 = weighted average at input, 1/2/3 = weighted average after first/second/third encoder layer, 4 = weighted average after attention pooling, warmup epoch: number of epochs to train the generators before training the classifier, random ratio: No = equal possibility on choosing ddpn or decoder out for temporal mixup/equal weight for weighted average mixup, Yes = beta/dirichlet distribution with b=0.2 for a random ratio more heavily tilted towards one of the mixup candidates).

Table 22: Ablation study of mixup in the MI task

| Configuration<br>(mixup layer/<br>warmup<br>epoch/<br>random ratio) | MI (Seen)           |                     |                     |                     | MI (Unseen)         |                     |                     |                     |
|---------------------------------------------------------------------|---------------------|---------------------|---------------------|---------------------|---------------------|---------------------|---------------------|---------------------|
|                                                                     | Acc (%)             | F1 (%)              | Recall (%)          | AUC (%)             | Acc (%)             | F1 (%)              | Recall (%)          | AUC (%)             |
| -1 / 100 / No                                                       | 57.69 ± 3.27        | 55.70 ± 4.59        | 57.69 ± 3.27        | 84.97 ± 1.19        | 36.78 ± 5.22        | 35.94 ± 5.62        | 36.78 ± 5.22        | 63.44 ± 5.17        |
| -1 / 100 / Yes                                                      | 58.33 ± 2.10        | 56.58 ± 3.53        | 58.33 ± 2.10        | 84.52 ± 1.20        | 36.23 ± 5.56        | 35.56 ± 5.90        | 36.23 ± 5.56        | 63.44 ± 5.01        |
| -1 / 150 / No                                                       | 58.13 ± 4.14        | 56.10 ± 5.03        | 58.13 ± 4.14        | 85.32 ± 1.64        | 35.53 ± 3.03        | 34.51 ± 3.21        | 35.53 ± 3.03        | 62.92 ± 3.83        |
| -1 / 150 / Yes                                                      | 57.44 ± 4.36        | 55.81 ± 5.18        | 57.44 ± 4.36        | 85.03 ± 2.00        | 36.49 ± 5.74        | 35.68 ± 6.36        | 36.49 ± 5.74        | 63.62 ± 5.23        |
| 0 / 100 / No                                                        | 62.75 ± 6.07        | 62.71 ± 5.90        | 62.75 ± 6.07        | 85.84 ± 4.03        | 36.83 ± 8.41        | 36.01 ± 8.52        | 36.83 ± 8.41        | 63.51 ± 6.71        |
| 0 / 100 / Yes                                                       | 62.25 ± 3.33        | 62.32 ± 3.18        | 62.25 ± 3.33        | 86.28 ± 2.31        | 38.14 ± 8.56        | 37.99 ± 8.69        | 38.14 ± 8.56        | 63.64 ± 5.84        |
| 0 / 150 / No                                                        | <b>63.44 ± 3.44</b> | <b>63.44 ± 3.36</b> | <b>63.44 ± 3.44</b> | <b>87.20 ± 2.69</b> | 35.45 ± 6.82        | 34.63 ± 6.56        | 35.45 ± 6.82        | 62.40 ± 5.07        |
| 0 / 150 / Yes                                                       | 62.95 ± 5.94        | 62.97 ± 5.95        | 62.95 ± 5.94        | 86.71 ± 3.13        | 36.17 ± 6.50        | 35.66 ± 6.94        | 36.17 ± 6.50        | 63.10 ± 5.78        |
| 1 / 100 / No                                                        | 59.38 ± 3.80        | 59.23 ± 3.95        | 59.38 ± 3.80        | 83.61 ± 2.36        | 36.08 ± 4.55        | 35.17 ± 5.20        | 36.08 ± 4.55        | 63.93 ± 5.77        |
| 1 / 100 / Yes                                                       | 61.56 ± 3.06        | 61.43 ± 3.04        | 61.56 ± 3.06        | 85.52 ± 1.81        | 37.15 ± 7.61        | 37.02 ± 7.84        | 37.15 ± 7.61        | 63.38 ± 6.53        |
| 1 / 150 / No                                                        | 60.37 ± 2.25        | 60.50 ± 2.29        | 60.37 ± 2.25        | 84.62 ± 1.70        | 36.34 ± 6.36        | 35.71 ± 6.82        | 36.34 ± 6.36        | 62.81 ± 4.85        |
| 1 / 150 / Yes                                                       | 62.35 ± 4.00        | 62.42 ± 4.01        | 62.35 ± 4.00        | 86.41 ± 2.23        | 36.63 ± 5.51        | 36.44 ± 5.79        | 36.63 ± 5.51        | 63.27 ± 5.17        |
| 2 / 100 / No                                                        | 59.13 ± 1.21        | 58.48 ± 1.39        | 59.13 ± 1.21        | 84.00 ± 1.30        | 36.95 ± 5.34        | 36.40 ± 5.15        | 36.95 ± 5.34        | 63.50 ± 5.68        |
| 2 / 100 / Yes                                                       | 58.58 ± 2.26        | 58.41 ± 2.03        | 58.58 ± 2.26        | 83.91 ± 2.18        | 37.82 ± 5.87        | 37.69 ± 5.88        | 37.82 ± 5.87        | 63.69 ± 5.22        |
| 2 / 150 / No                                                        | 57.74 ± 1.79        | 57.12 ± 1.01        | 57.74 ± 1.79        | 83.61 ± 1.38        | <b>38.83 ± 7.09</b> | <b>38.71 ± 7.33</b> | <b>38.83 ± 7.09</b> | <b>64.79 ± 6.40</b> |
| 2 / 150 / Yes                                                       | 61.16 ± 2.46        | 61.03 ± 2.62        | 61.16 ± 2.46        | 85.02 ± 0.98        | 36.46 ± 6.26        | 36.53 ± 6.41        | 36.46 ± 6.26        | 62.82 ± 5.49        |
| 3 / 100 / No                                                        | 59.77 ± 3.53        | 59.26 ± 3.93        | 59.77 ± 3.53        | 83.27 ± 1.17        | 36.86 ± 6.21        | 36.42 ± 6.34        | 36.86 ± 6.21        | 63.59 ± 6.18        |
| 3 / 100 / Yes                                                       | 60.07 ± 1.21        | 59.72 ± 0.76        | 60.07 ± 1.21        | 84.79 ± 1.44        | 37.88 ± 7.69        | 37.73 ± 7.67        | 37.88 ± 7.69        | 63.69 ± 5.73        |
| 3 / 150 / No                                                        | 59.67 ± 4.03        | 59.30 ± 4.29        | 59.67 ± 4.03        | 84.50 ± 2.93        | 36.72 ± 3.88        | 36.70 ± 4.28        | 36.72 ± 3.88        | 63.31 ± 3.79        |
| 3 / 150 / Yes                                                       | 60.81 ± 3.74        | 60.61 ± 3.77        | 60.81 ± 3.74        | 84.25 ± 2.34        | 37.36 ± 5.16        | 37.32 ± 5.27        | 37.36 ± 5.16        | 63.37 ± 5.07        |
| 4 / 100 / No                                                        | 57.94 ± 2.28        | 56.67 ± 0.50        | 57.94 ± 2.28        | 84.04 ± 1.48        | 36.40 ± 3.79        | 36.01 ± 3.93        | 36.40 ± 3.79        | 63.75 ± 3.65        |
| 4 / 100 / Yes                                                       | 58.23 ± 4.14        | 57.97 ± 3.77        | 58.23 ± 4.14        | 84.10 ± 2.88        | 37.15 ± 5.17        | 36.69 ± 5.45        | 37.15 ± 5.17        | 63.87 ± 4.77        |
| 4 / 150 / No                                                        | 58.33 ± 3.37        | 57.92 ± 2.86        | 58.33 ± 3.37        | 84.05 ± 2.06        | 37.96 ± 5.57        | 37.06 ± 5.58        | 37.96 ± 5.57        | 64.10 ± 4.85        |
| 4 / 150 / Yes                                                       | 57.79 ± 4.99        | 56.75 ± 4.50        | 57.79 ± 4.99        | 84.08 ± 3.49        | 36.69 ± 6.35        | 36.61 ± 6.49        | 36.69 ± 6.35        | 63.53 ± 5.17        |

Mean±std is reported separately for Accuracy, F1, Recall, and AUC on seen- and unseen-subject test splits across four tasks (mixup layer: -1 = temporal mixup at input, 0 = weighted average at input, 1/2/3 = weighted average after first/second/third encoder layer, 4 = weighted average after attention pooling, warmup epoch: number of epochs to train the generators before training the classifier, random ratio: No = equal possibility on choosing ddpn or decoder out for temporal mixup/equal weight for weighted average mixup, Yes = beta/dirichlet distribution with b=0.2 for a random ratio more heavily tilted towards one of the mixup candidates).



Table 23: Ablation study of mixup in the Imagined Speech task

| Configuration<br>(mixup layer/<br>warmup epoch/<br>epoch/ random ratio) | Imagined Speech (Seen) |                     |                     |                     | Imagined Speech (Unseen) |                    |                     |                     |
|-------------------------------------------------------------------------|------------------------|---------------------|---------------------|---------------------|--------------------------|--------------------|---------------------|---------------------|
|                                                                         | Acc (%)                | F1 (%)              | Recall (%)          | AUC (%)             | Acc (%)                  | F1 (%)             | Recall (%)          | AUC (%)             |
| -1 / 100 / No                                                           | 17.57 ± 1.17           | 12.24 ± 3.26        | 17.55 ± 1.16        | 73.01 ± 0.91        | <b>12.12 ± 0.38</b>      | 7.77 ± 1.27        | <b>12.12 ± 0.38</b> | 55.73 ± 2.77        |
| -1 / 100 / Yes                                                          | 17.32 ± 2.69           | 11.18 ± 4.16        | 17.30 ± 2.69        | <b>73.64 ± 1.56</b> | 10.86 ± 1.43             | 6.80 ± 0.49        | 10.86 ± 1.43        | <b>57.63 ± 0.34</b> |
| -1 / 150 / No                                                           | 18.08 ± 0.42           | 11.48 ± 2.44        | 18.06 ± 0.44        | 73.07 ± 0.81        | 11.87 ± 0.79             | 7.43 ± 0.65        | 11.87 ± 0.79        | 56.82 ± 1.54        |
| -1 / 150 / Yes                                                          | 18.46 ± 1.07           | 11.88 ± 3.10        | 18.43 ± 1.09        | 73.20 ± 0.72        | 11.62 ± 1.22             | 7.19 ± 0.74        | 11.62 ± 1.22        | 56.62 ± 1.89        |
| 0 / 100 / No                                                            | 17.19 ± 0.62           | 11.74 ± 1.58        | 17.17 ± 0.58        | 73.14 ± 0.75        | 11.36 ± 1.00             | 7.50 ± 0.70        | 11.36 ± 1.00        | 56.25 ± 2.15        |
| 0 / 100 / Yes                                                           | <b>19.47 ± 0.95</b>    | <b>14.70 ± 0.60</b> | <b>19.44 ± 0.95</b> | 71.90 ± 1.82        | 11.62 ± 1.43             | <b>9.29 ± 0.89</b> | 11.62 ± 1.43        | 53.80 ± 2.29        |
| 0 / 150 / No                                                            | 17.57 ± 0.46           | 10.97 ± 1.65        | 17.55 ± 0.44        | 72.96 ± 0.91        | 11.87 ± 0.79             | 7.47 ± 0.66        | 11.87 ± 0.79        | 56.72 ± 1.71        |
| 0 / 150 / Yes                                                           | 16.31 ± 1.40           | 11.45 ± 0.58        | 16.29 ± 1.37        | 72.38 ± 1.63        | 10.35 ± 2.09             | 6.11 ± 1.09        | 10.35 ± 2.09        | 54.91 ± 2.51        |
| 1 / 100 / No                                                            | 18.08 ± 1.77           | 13.16 ± 3.38        | 18.06 ± 1.79        | 72.47 ± 3.16        | 11.24 ± 2.52             | 8.33 ± 2.28        | 11.24 ± 2.52        | 55.49 ± 1.96        |
| 1 / 100 / Yes                                                           | 18.08 ± 0.42           | 10.55 ± 1.10        | 18.06 ± 0.44        | 73.19 ± 0.73        | 10.73 ± 2.74             | 7.45 ± 0.65        | 10.73 ± 2.74        | 55.25 ± 4.22        |
| 1 / 150 / No                                                            | 17.95 ± 1.71           | 13.77 ± 3.24        | 17.93 ± 1.71        | 72.17 ± 1.62        | 9.72 ± 2.66              | 6.59 ± 0.17        | 9.72 ± 2.66         | 54.45 ± 3.34        |
| 1 / 150 / Yes                                                           | 17.19 ± 1.11           | 10.51 ± 1.05        | 17.17 ± 1.09        | 73.00 ± 0.88        | 11.62 ± 1.22             | 6.55 ± 1.61        | 11.62 ± 1.22        | 55.87 ± 3.15        |
| 2 / 100 / No                                                            | 17.45 ± 0.41           | 12.91 ± 1.93        | 17.42 ± 0.38        | 71.57 ± 2.51        | 10.23 ± 1.97             | 6.84 ± 0.55        | 10.23 ± 1.97        | 55.16 ± 2.83        |
| 2 / 100 / Yes                                                           | 16.94 ± 0.98           | 11.57 ± 0.78        | 16.92 ± 0.95        | 72.98 ± 0.88        | 11.87 ± 1.43             | 7.37 ± 2.88        | 11.87 ± 1.43        | 55.90 ± 3.18        |
| 2 / 150 / No                                                            | 16.94 ± 0.98           | 11.96 ± 1.46        | 16.92 ± 0.95        | 72.48 ± 1.47        | 11.11 ± 1.22             | 5.91 ± 0.97        | 11.11 ± 1.22        | 54.66 ± 2.50        |
| 2 / 150 / Yes                                                           | 17.19 ± 1.11           | 10.51 ± 1.05        | 17.17 ± 1.09        | 73.00 ± 0.88        | 11.62 ± 1.22             | 6.55 ± 1.61        | 11.62 ± 1.22        | 55.87 ± 3.15        |
| 3 / 100 / No                                                            | 17.45 ± 0.70           | 14.12 ± 0.68        | 17.42 ± 0.66        | 71.25 ± 1.86        | 9.47 ± 1.65              | 8.07 ± 1.49        | 9.47 ± 1.65         | 52.88 ± 1.35        |
| 3 / 100 / Yes                                                           | 17.07 ± 1.03           | 11.79 ± 1.17        | 17.05 ± 1.00        | 73.38 ± 0.86        | 11.49 ± 1.16             | 6.76 ± 1.91        | 11.49 ± 1.16        | 55.63 ± 2.91        |
| 3 / 150 / No                                                            | 16.06 ± 0.20           | 11.54 ± 1.04        | 16.04 ± 0.22        | 71.23 ± 1.65        | 11.11 ± 0.79             | 6.73 ± 1.63        | 11.11 ± 0.79        | 53.75 ± 1.70        |
| 3 / 150 / Yes                                                           | 16.44 ± 1.26           | 9.43 ± 2.92         | 16.41 ± 1.22        | 72.50 ± 1.45        | 11.74 ± 1.31             | 5.30 ± 1.29        | 11.74 ± 1.31        | 57.20 ± 4.91        |
| 4 / 100 / No                                                            | 16.56 ± 1.13           | 10.92 ± 0.36        | 16.54 ± 1.09        | 73.15 ± 0.81        | 11.49 ± 1.16             | 6.92 ± 2.16        | 11.49 ± 1.16        | 54.95 ± 2.52        |
| 4 / 100 / Yes                                                           | 17.19 ± 1.11           | 10.51 ± 1.05        | 17.17 ± 1.09        | 73.00 ± 0.88        | 11.62 ± 1.22             | 6.55 ± 1.61        | 11.62 ± 1.22        | 55.87 ± 3.15        |
| 4 / 150 / No                                                            | 16.44 ± 1.26           | 11.07 ± 0.13        | 16.41 ± 1.22        | 71.59 ± 2.89        | 10.35 ± 2.09             | 5.38 ± 1.20        | 10.35 ± 2.09        | 54.50 ± 2.53        |
| 4 / 150 / Yes                                                           | 17.19 ± 1.11           | 10.51 ± 1.05        | 17.17 ± 1.09        | 73.00 ± 0.88        | 11.62 ± 1.22             | 6.55 ± 1.61        | 11.62 ± 1.22        | 55.87 ± 3.15        |

Mean±std is reported separately for Accuracy, F1, Recall, and AUC on seen- and unseen-subject test splits across four tasks (mixup layer: -1 = temporal mixup at input, 0 = weighted average at input, 1/2/3 = weighted average after first/second/third encoder layer, 4 = weighted average after attention pooling, warmup epoch: number of epochs to train the generators before training the classifier, random ratio: No = equal possibility on choosing ddpn or decoder out for temporal mixup/equal weight for weighted average mixup, Yes = beta/dirichlet distribution with b=0.2 for a random ratio more heavily tilted towards one of the mixup candidates).

## 91 4 Complete statistical reporting results

### 92 4.1 Methodology

93 EEG decoding suffers from low statistical power due to extreme inter-subject variability, limited  
 94 trial counts, and costly LOSO evaluation Kukhilava et al. [2025], Huang et al. [2023]. In our  
 95 runs with three independent seeds, standard tests (Wilcoxon, permutation) often returned  $p$ -values  
 96 near 1.0, masking reproducible gains, which is an expected outcome in such low- $n$ , high-variance  
 97 settings Vialatte and Cichocki [2008], Nakagawa [2004]. We therefore propose a complementary  
 98 framework emphasizing effect size estimation and evidence synthesis over binary significance. This  
 99 approach quantifies improvement magnitude and consistency across seeds and datasets, retaining  
 100 sensitivity to systematic trends even when classical tests fail, in line with best practices for robust  
 101 neural decoding Vialatte and Cichocki [2008], Nakagawa [2004].

102 For each comparison between configurations  $c_1$  and  $c_2$ , we compute Cohen’s  $d$  and its 95% confi-  
 103 dence interval:

$$d = \frac{\bar{x}_{c_1} - \bar{x}_{c_2}}{s_{\text{pooled}}}, \quad \text{CI}_{95\%} = d \pm t_{\alpha/2, df} \cdot \text{SE}_d,$$

104 where the standard error is

$$\text{SE}_d = \sqrt{\frac{n_1 + n_2}{n_1 n_2} + \frac{d^2}{2(n_1 + n_2)}}.$$

105 A win is established through hierarchical evidence assessment based on cross-seed consistency and  
 106 effect magnitude. For configurations with complete cross-seed agreement (i.e., all seeds exhibit con-  
 107 sistent directional differences), evidence strength is defined as follows: (1) strong evidence requires  
 108 both a large effect size ( $|d| \geq 0.5$ ) and a meaningful relative improvement of at least 2%; (2) moder-  
 109 ate evidence requires either a large effect size ( $|d| \geq 0.5$ ) or a relative improvement of at least 2%;  
 110 (3) weak evidence requires a medium effect size ( $|d| \geq 0.3$ ); (4) minimal evidence requires a small  
 111 effect size ( $|d| \geq 0.2$ ). For configurations exhibiting majority cross-seed agreement (i.e., at least  
 112 2 out of 3 seeds show consistent direction), all evidence categories are downgraded by one level.  
 113 Configuration  $c_1$  is considered to exhibit superior performance over  $c_2$  if any evidence category is  
 114 satisfied.

115 To summarize model comparisons, we construct a win-loss matrix  $\mathbf{W}$  where  $W_{ij} = 1$  if config-  
 116 uration  $i$  shows evidence of superiority over configuration  $j$ . The win rate of configuration  $c_i$  is  
 117 computed as

$$\text{WinRate}_i = \frac{\sum_j W_{ij}}{\sum_j (W_{ij} + W_{ji})}.$$

118 This matrix supports a global ranking across all configurations.

119 As a complementary analysis, we compute posterior probabilities  $P(\text{left})$ ,  $P(\text{rope})$ , and  $P(\text{right})$   
 120 using the `baycomp` framework with ROPE threshold  $\rho = 0.01$ . Configuration  $c_1$  is considered to  
 121 have Bayesian evidence of superiority if  $P(\text{right}) > 0.85$ .

## 122 4.2 Results

### 123 4.2.1 Practical evidence assessments

### 124 4.2.2 Bayesian evidence assessment

125 Due to page limitations, only SSVEP task results are shown.

### 126 4.2.3 Wilcoxon signed rank tests and permutation tests

127 Due to minimal statistical significance after correction, only one complete analytical framework  
 128 applied to SSVEP ablation results is presented as a demonstrative example, constrained by page  
 129 limitations

Table 24: Practical evidence assessment of decoder input ablations in the SSVEP task

| Config            | Seen |        |       |       |                                                                              |                                                                                                                                                                                                                                                    |                                               | Unseen |        |       |       |                                                                                                                                                                                                                           |                                                                                                                   |                                               |
|-------------------|------|--------|-------|-------|------------------------------------------------------------------------------|----------------------------------------------------------------------------------------------------------------------------------------------------------------------------------------------------------------------------------------------------|-----------------------------------------------|--------|--------|-------|-------|---------------------------------------------------------------------------------------------------------------------------------------------------------------------------------------------------------------------------|-------------------------------------------------------------------------------------------------------------------|-----------------------------------------------|
|                   | Wins | Losses | Total | Rate  | Win List                                                                     | Loss List                                                                                                                                                                                                                                          | Evidence                                      | Wins   | Losses | Total | Rate  | Win List                                                                                                                                                                                                                  | Loss List                                                                                                         | Evidence                                      |
| x.hat + skips     | 6    | 0      | 6     | 1.00  | skips<br>x + x.hat<br>z + skips<br>z + x<br>z only                           | —                                                                                                                                                                                                                                                  | Weak:3<br>Minimal:2<br>Moderate:1             | 4      | 2      | 6     | 0.667 | x + skips<br>x + x.hat + skips<br>z + x<br>z + x.hat                                                                                                                                                                      | x + x.hat<br>z only                                                                                               | Minimal:2<br>Strong:1<br>Weak:1               |
| x + x.hat + skips | 7    | 0      | 7     | 1.00  | skips<br>x + skips<br>x + x.hat<br>z + skips<br>z + x<br>z + x.hat<br>z only | —                                                                                                                                                                                                                                                  | Weak:3<br>Moderate:2<br>Strong:1<br>Minimal:1 | 2      | 3      | 5     | 0.40  | x + skips<br>z + x                                                                                                                                                                                                        | x + x.hat<br>x.hat + skips<br>z only                                                                              | Moderate:2                                    |
| x + skips         | 5    | 1      | 6     | 0.833 | skips<br>x + x.hat<br>z + skips<br>z + x<br>z + x.hat                        | x + x.hat +<br>skips                                                                                                                                                                                                                               | Minimal:2<br>Weak:2<br>Moderate:1             | 0      | 6      | 6     | 0.00  | —                                                                                                                                                                                                                         | x + x.hat<br>x + x.hat +<br>skips<br>x.hat + skips<br>z + skips<br>z + x.hat<br>z only                            | —                                             |
| z + skips         | 2    | 3      | 5     | 0.40  | skips<br>z + x                                                               | x + skips<br>x + x.hat +<br>skips<br>x.hat + skips                                                                                                                                                                                                 | Weak:1<br>Minimal:1                           | 3      | 2      | 5     | 0.60  | skips<br>x + skips<br>z + x<br>skips<br>x + skips<br>x + x.hat + skips<br>x.hat + skips<br>z + skips<br>z + x<br>z + x.hat<br>skips<br>x + skips<br>x + x.hat + skips<br>x.hat + skips<br>z + skips<br>z + x<br>z + x.hat | x + x.hat<br>z only                                                                                               | Moderate:2<br>Weak:1                          |
| x + x.hat         | 2    | 3      | 5     | 0.40  | skips<br>z + x                                                               | x + skips<br>x + x.hat +<br>skips<br>x.hat + skips                                                                                                                                                                                                 | Moderate:1<br>Weak:1                          | 7      | 0      | 7     | 1.00  | —                                                                                                                                                                                                                         | —                                                                                                                 | Moderate:3<br>Strong:2<br>Minimal:1<br>Weak:1 |
| z only            | 1    | 2      | 3     | 0.333 | skips                                                                        | x + x.hat +<br>skips<br>x.hat + skips                                                                                                                                                                                                              | Moderate:1                                    | 7      | 0      | 7     | 1.00  | —                                                                                                                                                                                                                         | —                                                                                                                 | Strong:3<br>Weak:2<br>Minimal:1<br>Moderate:1 |
| z + x.hat         | 1    | 3      | 4     | 0.25  | skips                                                                        | x + skips<br>x + x.hat +<br>skips<br>x.hat + skips<br>x + skips<br>x + x.hat<br>x + x.hat +<br>skips<br>x.hat + skips<br>z + skips<br>x + skips<br>x + x.hat<br>x + x.hat +<br>skips<br>x.hat + skips<br>z + skips<br>z + x<br>z + x.hat<br>z only | Weak:1                                        | 1      | 3      | 4     | 0.25  | x + skips                                                                                                                                                                                                                 | x + x.hat<br>x.hat + skips<br>z only<br>x + x.hat<br>x + x.hat +<br>skips<br>x.hat + skips<br>z + skips<br>z only | Minimal:1                                     |
| z + x             | 1    | 5      | 6     | 0.167 | skips                                                                        | x + skips<br>x + x.hat +<br>skips<br>x.hat + skips<br>z + skips<br>x + skips<br>x + x.hat<br>x + x.hat +<br>skips<br>x.hat + skips<br>z + skips<br>z + x<br>z + x.hat<br>z only                                                                    | Weak:1                                        | 0      | 5      | 5     | 0.00  | —                                                                                                                                                                                                                         | —                                                                                                                 | —                                             |
| skips             | 0    | 8      | 8     | 0.00  | —                                                                            | x + x.hat +<br>skips<br>z + skips<br>z + x<br>z + x.hat<br>z only                                                                                                                                                                                  | —                                             | 0      | 3      | 3     | 0.00  | —                                                                                                                                                                                                                         | x + x.hat<br>z + skips<br>z only                                                                                  | —                                             |

Each configuration’s wins, losses, total comparisons, and win rate are reported, along with the corresponding lists of winning and losing opponents and an evidence summary.

Table 25: Practical evidence assessment of classifier type ablations in the SSVEP task

| Config                        | Seen |        |       |      |                                                                                                                                                                                     |                                                                                                                                 |          | Unseen |        |       |      |                                                                                                                                                                             |                                                                                                      |                        |
|-------------------------------|------|--------|-------|------|-------------------------------------------------------------------------------------------------------------------------------------------------------------------------------------|---------------------------------------------------------------------------------------------------------------------------------|----------|--------|--------|-------|------|-----------------------------------------------------------------------------------------------------------------------------------------------------------------------------|------------------------------------------------------------------------------------------------------|------------------------|
|                               | Wins | Losses | Total | Rate | Win List                                                                                                                                                                            | Loss List                                                                                                                       | Evidence | Wins   | Losses | Total | Rate | Win List                                                                                                                                                                    | Loss List                                                                                            | Evidence               |
| cegnet_classifier_x           | 6    | 0      | 6     | 1.00 | cegnet_classifier_decoder.out<br>cegnet_classifier_x.hat<br>fc_classifier_decoder.out<br>fc_classifier_x<br>fc_classifier_x.hat<br>fc_classifier_z<br>cegnet_classifier_decoder.out | —                                                                                                                               | Strong:6 | 5      | 1      | 6     | 0.83 | cegnet_classifier_decoder.out<br>cegnet_classifier_x.hat<br>fc_classifier_decoder.out<br>fc_classifier_x<br>fc_classifier_x.hat                                             | fc_classifier_z                                                                                      | Strong:5               |
| fc_classifier_z               | 5    | 1      | 6     | 0.83 | cegnet_classifier_decoder.out<br>cegnet_classifier_x.hat<br>fc_classifier_decoder.out<br>fc_classifier_x<br>fc_classifier_x.hat                                                     | cegnet_classifier_x                                                                                                             | Strong:5 | 6      | 0      | 6     | 1.00 | cegnet_classifier_decoder.out<br>cegnet_classifier_x<br>cegnet_classifier_x.hat<br>cegnet_classifier_x<br>cegnet_classifier_x.hat<br>fc_classifier_x<br>fc_classifier_x.hat | —                                                                                                    | Strong:6               |
| cegnet_classifier_decoder.out | 4    | 2      | 6     | 0.67 | cegnet_classifier_x.hat<br>fc_classifier_decoder.out<br>fc_classifier_x<br>fc_classifier_x.hat                                                                                      | cegnet_classifier_x<br>fc_classifier_z                                                                                          | Strong:4 | 4      | 2      | 6     | 0.67 | cegnet_classifier_x.hat<br>fc_classifier_decoder.out<br>fc_classifier_x<br>fc_classifier_x.hat                                                                              | cegnet_classifier_x<br>fc_classifier_z                                                               | Strong:3<br>Weak:1     |
| fc_classifier_decoder.out     | 3    | 3      | 6     | 0.50 | cegnet_classifier_x.hat<br>fc_classifier_x<br>fc_classifier_x.hat                                                                                                                   | cegnet_classifier_decoder.out                                                                                                   | Strong:3 | 3      | 3      | 6     | 0.50 | cegnet_classifier_x.hat<br>cegnet_classifier_x<br>fc_classifier_x<br>fc_classifier_x.hat                                                                                    | cegnet_classifier_decoder.out                                                                        | Strong:3               |
| cegnet_classifier_x.hat       | 1    | 4      | 5     | 0.20 | cegnet_classifier_x<br>fc_classifier_decoder.out<br>fc_classifier_z                                                                                                                 | cegnet_classifier_decoder.out<br>cegnet_classifier_x<br>cegnet_classifier_x.hat<br>fc_classifier_decoder.out<br>fc_classifier_z | Strong:1 | 1      | 5      | 6     | 0.17 | cegnet_classifier_x.hat<br>cegnet_classifier_x<br>fc_classifier_x<br>fc_classifier_x.hat                                                                                    | cegnet_classifier_decoder.out                                                                        | Moderate:1             |
| fc_classifier_x               | 1    | 4      | 5     | 0.20 | fc_classifier_x.hat                                                                                                                                                                 | cegnet_classifier_decoder.out<br>cegnet_classifier_x<br>cegnet_classifier_x.hat<br>fc_classifier_decoder.out<br>fc_classifier_z | Strong:1 | 2      | 4      | 6     | 0.33 | cegnet_classifier_x.hat<br>fc_classifier_x.hat                                                                                                                              | cegnet_classifier_decoder.out<br>cegnet_classifier_x<br>fc_classifier_decoder.out<br>fc_classifier_z | Moderate:1<br>Strong:1 |
| fc_classifier_x.hat           | 0    | 6      | 6     | 0.00 | —                                                                                                                                                                                   | cegnet_classifier_decoder.out<br>cegnet_classifier_x<br>cegnet_classifier_x.hat<br>fc_classifier_decoder.out<br>fc_classifier_z | —        | 0      | 6      | 6     | 0.00 | —                                                                                                                                                                           | cegnet_classifier_x<br>cegnet_classifier_x.hat<br>fc_classifier_decoder.out<br>fc_classifier_z       | —                      |

Each configuration’s wins, losses, total comparisons, and win rate are reported, along with the corresponding lists of winning and losing opponents and an evidence summary.

Table 26: Practical evidence assessment of architecture ablations in the SSVEP task

| Config                     | Seen |        |       |      |                                                                                                                                     |                                                                                                                               |                       | Unseen |        |       |      |                                                                                                                                                                                                                           |           |                        |
|----------------------------|------|--------|-------|------|-------------------------------------------------------------------------------------------------------------------------------------|-------------------------------------------------------------------------------------------------------------------------------|-----------------------|--------|--------|-------|------|---------------------------------------------------------------------------------------------------------------------------------------------------------------------------------------------------------------------------|-----------|------------------------|
|                            | Wins | Losses | Total | Rate | Win List                                                                                                                            | Loss List                                                                                                                     | Evidence              | Wins   | Losses | Total | Rate | Win List                                                                                                                                                                                                                  | Loss List | Evidence               |
| no_ddpm_x_no_decoder       | 5    | 0      | 5     | 1.00 | no_ddpm_x_use_decoder<br>use_ddpm_x_no_decoder<br>use_ddpm_x_use_decoder<br>use_ddpm_x_hat_no_decoder<br>use_ddpm_x_hat_use_decoder | —                                                                                                                             | Strong:4<br>Minimal:1 | 4      | 0      | 4     | 1.00 | use_ddpm_x_no_decoder<br>use_ddpm_x_use_decoder<br>use_ddpm_x_hat_no_decoder<br>use_ddpm_x_hat_use_decoder                                                                                                                | —         | Strong:3<br>Moderate:1 |
| no_ddpm_x_use_decoder      | 4    | 1      | 5     | 0.80 | use_ddpm_x_no_decoder<br>use_ddpm_x_use_decoder<br>use_ddpm_x_hat_no_decoder<br>use_ddpm_x_hat_use_decoder                          | no_ddpm_x_no_decoder                                                                                                          | Strong:4              | 3      | 0      | 3     | 1.00 | use_ddpm_x_no_decoder<br>use_ddpm_x_hat_no_decoder<br>use_ddpm_x_hat_use_decoder                                                                                                                                          | —         | Strong:2<br>Minimal:1  |
| use_ddpm_x_no_decoder      | 3    | 2      | 5     | 0.60 | use_ddpm_x_hat_no_decoder<br>use_ddpm_x_hat_use_decoder<br>use_ddpm_x_hat_no_decoder<br>use_ddpm_x_hat_use_decoder                  | no_ddpm_x_no_decoder<br>no_ddpm_x_use_decoder                                                                                 | Strong:2<br>Minimal:1 | 2      | 3      | 5     | 0.40 | use_ddpm_x_hat_no_decoder<br>use_ddpm_x_hat_use_decoder<br>no_ddpm_x_no_decoder<br>no_ddpm_x_use_decoder                                                                                                                  | —         | Strong:2               |
| use_ddpm_x_use_decoder     | 2    | 3      | 5     | 0.40 | use_ddpm_x_hat_no_decoder<br>use_ddpm_x_hat_use_decoder<br>use_ddpm_x_no_decoder<br>use_ddpm_x_use_decoder                          | no_ddpm_x_no_decoder<br>no_ddpm_x_use_decoder                                                                                 | Strong:2              | 3      | 1      | 4     | 0.75 | use_ddpm_x_no_decoder<br>use_ddpm_x_hat_no_decoder<br>use_ddpm_x_hat_use_decoder                                                                                                                                          | —         | Strong:2<br>Moderate:1 |
| use_ddpm_x_hat_no_decoder  | 1    | 4      | 5     | 0.20 | use_ddpm_x_hat_use_decoder<br>no_ddpm_x_no_decoder<br>no_ddpm_x_use_decoder<br>use_ddpm_x_no_decoder<br>use_ddpm_x_use_decoder      | no_ddpm_x_no_decoder<br>no_ddpm_x_use_decoder<br>use_ddpm_x_hat_no_decoder<br>use_ddpm_x_hat_use_decoder                      | Weak:1                | 0      | 5      | 5     | 0.00 | —<br>no_ddpm_x_no_decoder<br>no_ddpm_x_use_decoder<br>use_ddpm_x_hat_no_decoder<br>use_ddpm_x_hat_use_decoder<br>no_ddpm_x_no_decoder<br>no_ddpm_x_use_decoder<br>use_ddpm_x_hat_no_decoder<br>use_ddpm_x_hat_use_decoder | —         |                        |
| use_ddpm_x_hat_use_decoder | 0    | 5      | 5     | 0.00 | —                                                                                                                                   | no_ddpm_x_no_decoder<br>no_ddpm_x_use_decoder<br>use_ddpm_x_no_decoder<br>use_ddpm_x_use_decoder<br>use_ddpm_x_hat_no_decoder | —                     | 1      | 4      | 5     | 0.20 | use_ddpm_x_hat_no_decoder<br>no_ddpm_x_no_decoder<br>no_ddpm_x_use_decoder<br>use_ddpm_x_hat_no_decoder<br>use_ddpm_x_hat_use_decoder                                                                                     | —         | Weak:1                 |

Each configuration’s wins, losses, total comparisons, and win rate are reported, along with the corresponding lists of winning and losing opponents and an evidence summary.

Table 27: Practical evidence assessment of mixup ablations in the SSVEP task

| Config          | Seen |        |       |      |                                                                                                                                                                   |                                                                                                              |                                                  | Unseen |        |       |      |                                                                                                                                                                   |                                                                                                              |                                                  |
|-----------------|------|--------|-------|------|-------------------------------------------------------------------------------------------------------------------------------------------------------------------|--------------------------------------------------------------------------------------------------------------|--------------------------------------------------|--------|--------|-------|------|-------------------------------------------------------------------------------------------------------------------------------------------------------------------|--------------------------------------------------------------------------------------------------------------|--------------------------------------------------|
|                 | Wins | Losses | Total | Rate | Win List                                                                                                                                                          | Loss List                                                                                                    | Evidence                                         | Wins   | Losses | Total | Rate | Win List                                                                                                                                                          | Loss List                                                                                                    | Evidence                                         |
| layer-1_randNo  | 8    | 0      | 8     | 1.00 | layer1_randNo,<br>layer1_randYes,<br>layer2_randNo,<br>layer2_randYes,<br>layer3_randNo,<br>layer3_randYes,<br>layer4_randNo,<br>layer4_randYes                   | —                                                                                                            | Strong:5,<br>Moderate:2,<br>Weak:1               | 8      | 0      | 8     | 1.00 | layer1_randNo,<br>layer1_randYes,<br>layer2_randNo,<br>layer2_randYes,<br>layer3_randNo,<br>layer3_randYes,<br>layer4_randNo,<br>layer4_randYes                   | —                                                                                                            | Strong:5,<br>Moderate:2,<br>Weak:1               |
| layer-1_randYes | 9    | 0      | 9     | 1.00 | layer0_randNo,<br>layer1_randNo,<br>layer1_randYes,<br>layer2_randNo,<br>layer2_randYes,<br>layer3_randNo,<br>layer3_randYes,<br>layer4_randNo,<br>layer4_randYes | —                                                                                                            | Moderate:3,<br>Strong:3,<br>Weak:2,<br>Minimal:1 | 9      | 0      | 9     | 1.00 | layer0_randNo,<br>layer1_randNo,<br>layer1_randYes,<br>layer2_randNo,<br>layer2_randYes,<br>layer3_randNo,<br>layer3_randYes,<br>layer4_randNo,<br>layer4_randYes | —                                                                                                            | Moderate:3,<br>Strong:3,<br>Weak:2,<br>Minimal:1 |
| layer0_randYes  | 8    | 0      | 8     | 1.00 | layer1_randNo,<br>layer1_randYes,<br>layer2_randNo,<br>layer2_randYes,<br>layer3_randNo,<br>layer3_randYes,<br>layer4_randNo,<br>layer4_randYes                   | —                                                                                                            | Moderate:4,<br>Weak:2,<br>Minimal:2              | 8      | 0      | 8     | 1.00 | layer1_randNo,<br>layer1_randYes,<br>layer2_randNo,<br>layer2_randYes,<br>layer3_randNo,<br>layer3_randYes,<br>layer4_randNo,<br>layer4_randYes                   | —                                                                                                            | Moderate:4,<br>Weak:2,<br>Minimal:2              |
| layer0_randNo   | 8    | 1      | 9     | 0.89 | layer1_randNo,<br>layer1_randYes,<br>layer2_randNo,<br>layer2_randYes,<br>layer3_randNo,<br>layer3_randYes,<br>layer4_randNo,<br>layer4_randYes                   | layer-1_randYes                                                                                              | Moderate:3,<br>Strong:3,<br>Weak:2               | 8      | 1      | 9     | 0.89 | layer1_randNo,<br>layer1_randYes,<br>layer2_randNo,<br>layer2_randYes,<br>layer3_randNo,<br>layer3_randYes,<br>layer4_randNo,<br>layer4_randYes                   | layer-1_randYes                                                                                              | Moderate:3,<br>Strong:3,<br>Weak:2               |
| layer4_randNo   | 7    | 4      | 11    | 0.64 | layer1_randNo,<br>layer1_randYes,<br>layer2_randNo,<br>layer2_randYes,<br>layer3_randNo,<br>layer3_randYes,<br>layer4_randNo,<br>layer4_randYes                   | layer-1_randNo,<br>layer-1_randYes,<br>layer0_randNo,<br>layer0_randYes                                      | Weak:7                                           | 7      | 4      | 11    | 0.64 | layer1_randNo,<br>layer1_randYes,<br>layer2_randNo,<br>layer2_randYes,<br>layer3_randNo,<br>layer3_randYes,<br>layer4_randNo,<br>layer4_randYes                   | layer-1_randNo,<br>layer-1_randYes,<br>layer0_randNo,<br>layer0_randYes                                      | Weak:7                                           |
| layer2_randYes  | 3    | 5      | 8     | 0.38 | layer1_randYes,<br>layer3_randNo,<br>layer3_randYes                                                                                                               | layer-1_randNo,<br>layer-1_randYes,<br>layer0_randNo,<br>layer0_randYes,<br>layer4_randNo,<br>layer4_randYes | Weak:3                                           | 3      | 5      | 8     | 0.38 | layer1_randYes,<br>layer3_randNo,<br>layer3_randYes                                                                                                               | layer-1_randNo,<br>layer-1_randYes,<br>layer0_randNo,<br>layer0_randYes,<br>layer4_randNo,<br>layer4_randYes | Weak:3                                           |
| layer1_randYes  | 0    | 6      | 6     | 0.00 | —                                                                                                                                                                 | layer-1_randNo,<br>layer-1_randYes,<br>layer0_randNo,<br>layer0_randYes,<br>layer2_randYes,<br>layer4_randNo | —                                                | 0      | 6      | 6     | 0.00 | —                                                                                                                                                                 | layer-1_randNo,<br>layer-1_randYes,<br>layer0_randNo,<br>layer0_randYes,<br>layer2_randYes,<br>layer4_randNo | —                                                |
| layer1_randNo   | 0    | 5      | 5     | 0.00 | —                                                                                                                                                                 | layer-1_randNo,<br>layer-1_randYes,<br>layer0_randNo,<br>layer0_randYes,<br>layer4_randNo                    | —                                                | 0      | 5      | 5     | 0.00 | —                                                                                                                                                                 | layer-1_randNo,<br>layer-1_randYes,<br>layer0_randNo,<br>layer0_randYes,<br>layer4_randNo                    | —                                                |
| layer2_randNo   | 0    | 5      | 5     | 0.00 | —                                                                                                                                                                 | layer-1_randNo,<br>layer-1_randYes,<br>layer0_randNo,<br>layer0_randYes,<br>layer4_randNo                    | —                                                | 0      | 5      | 5     | 0.00 | —                                                                                                                                                                 | layer-1_randNo,<br>layer-1_randYes,<br>layer0_randNo,<br>layer0_randYes,<br>layer4_randNo                    | —                                                |
| layer3_randNo   | 0    | 6      | 6     | 0.00 | —                                                                                                                                                                 | layer-1_randNo,<br>layer-1_randYes,<br>layer0_randNo,<br>layer0_randYes,<br>layer2_randYes,<br>layer4_randNo | —                                                | 0      | 6      | 6     | 0.00 | —                                                                                                                                                                 | layer-1_randNo,<br>layer-1_randYes,<br>layer0_randNo,<br>layer0_randYes,<br>layer2_randYes,<br>layer4_randNo | —                                                |
| layer3_randYes  | 0    | 6      | 6     | 0.00 | —                                                                                                                                                                 | layer-1_randNo,<br>layer-1_randYes,<br>layer0_randNo,<br>layer0_randYes,<br>layer2_randYes,<br>layer4_randNo | —                                                | 0      | 6      | 6     | 0.00 | —                                                                                                                                                                 | layer-1_randNo,<br>layer-1_randYes,<br>layer0_randNo,<br>layer0_randYes,<br>layer2_randYes,<br>layer4_randNo | —                                                |
| layer4_randYes  | 0    | 5      | 5     | 0.00 | —                                                                                                                                                                 | layer-1_randNo,<br>layer-1_randYes,<br>layer0_randNo,<br>layer0_randYes,<br>layer4_randNo                    | —                                                | 0      | 5      | 5     | 0.00 | —                                                                                                                                                                 | layer-1_randNo,<br>layer-1_randYes,<br>layer0_randNo,<br>layer0_randYes,<br>layer4_randNo                    | —                                                |

Each row shows win/loss stats and qualitative evidence for seen and unseen subject comparisons.

Table 28: Practical evidence assessment of loss ablations in the SSVEP task (Part 1 of 2)

| Config                                            | Seen |        |       |      |                                                                                                                                                                                                                                                                                                                                                                                                                                                                                                                                                                                                                                                                                                                                                                                                                                                                                                                                                                                                                                                                                                                                                                                                                                                                                                                                                                                                                                                                                                                                                                                                                                                                                                                                                                                                                                                                                                                                                                                                                                                                                                                                                                                                                                                                                                                                                                                                                                                                                                                                                                                                                                                                                                                                                                                                                                                                                                                                                                                                                                                                                                                                                                                                                                                                                                                                                                                                                                                                                                                                                                                                                                                                                                                                                                                                                                                                                                                                                                                                                                                                                                                                                                                                                                                                                                                                                                                                                                                                                                                                                                                                                                                                                                                                                                                                                                                                                                                                                                                                                                                                                                                                                                                                                                                                                                                                                                                                                                                                                                                                                                                                                                                                                                                                                                                                                                                                                                                                                                                                                                                                                                                                                                                                                                                                                                                                                                                                                                                                                                                                                                                                                                                                                                                                                                                                                                                                                                                                                                                                                                                                                                                                                                                                                                                                                                                                                                                                                                                                                                                                                                                                                                                                                                                                                                                                                                                                                                                                                                                                                                                                                                                                                                                                                                                                                                                                                                                                                                                                                                                                                                                                                                                                                                                                                                                                                                                                                                                                                                                                                                                                                                                                                                                                                                                                                                                                                                                                                                                                                                                                                                                                                                                                                                                                                                                                                                                                                                                                                                                                                                                                                                                                                                                                                                                                                                                                                                                                                                                                                                                                                                                                                                                                                                                                                                                                                                                                                                                                                                                                                                                                                                                                                                                                                                                                                                                                                                                                                                                                                                                                                                                                                                                                                                                                                                                                                                                                                                                                                                                                                      |           | Unseen   |      |        |       |      |          |           |
|---------------------------------------------------|------|--------|-------|------|----------------------------------------------------------------------------------------------------------------------------------------------------------------------------------------------------------------------------------------------------------------------------------------------------------------------------------------------------------------------------------------------------------------------------------------------------------------------------------------------------------------------------------------------------------------------------------------------------------------------------------------------------------------------------------------------------------------------------------------------------------------------------------------------------------------------------------------------------------------------------------------------------------------------------------------------------------------------------------------------------------------------------------------------------------------------------------------------------------------------------------------------------------------------------------------------------------------------------------------------------------------------------------------------------------------------------------------------------------------------------------------------------------------------------------------------------------------------------------------------------------------------------------------------------------------------------------------------------------------------------------------------------------------------------------------------------------------------------------------------------------------------------------------------------------------------------------------------------------------------------------------------------------------------------------------------------------------------------------------------------------------------------------------------------------------------------------------------------------------------------------------------------------------------------------------------------------------------------------------------------------------------------------------------------------------------------------------------------------------------------------------------------------------------------------------------------------------------------------------------------------------------------------------------------------------------------------------------------------------------------------------------------------------------------------------------------------------------------------------------------------------------------------------------------------------------------------------------------------------------------------------------------------------------------------------------------------------------------------------------------------------------------------------------------------------------------------------------------------------------------------------------------------------------------------------------------------------------------------------------------------------------------------------------------------------------------------------------------------------------------------------------------------------------------------------------------------------------------------------------------------------------------------------------------------------------------------------------------------------------------------------------------------------------------------------------------------------------------------------------------------------------------------------------------------------------------------------------------------------------------------------------------------------------------------------------------------------------------------------------------------------------------------------------------------------------------------------------------------------------------------------------------------------------------------------------------------------------------------------------------------------------------------------------------------------------------------------------------------------------------------------------------------------------------------------------------------------------------------------------------------------------------------------------------------------------------------------------------------------------------------------------------------------------------------------------------------------------------------------------------------------------------------------------------------------------------------------------------------------------------------------------------------------------------------------------------------------------------------------------------------------------------------------------------------------------------------------------------------------------------------------------------------------------------------------------------------------------------------------------------------------------------------------------------------------------------------------------------------------------------------------------------------------------------------------------------------------------------------------------------------------------------------------------------------------------------------------------------------------------------------------------------------------------------------------------------------------------------------------------------------------------------------------------------------------------------------------------------------------------------------------------------------------------------------------------------------------------------------------------------------------------------------------------------------------------------------------------------------------------------------------------------------------------------------------------------------------------------------------------------------------------------------------------------------------------------------------------------------------------------------------------------------------------------------------------------------------------------------------------------------------------------------------------------------------------------------------------------------------------------------------------------------------------------------------------------------------------------------------------------------------------------------------------------------------------------------------------------------------------------------------------------------------------------------------------------------------------------------------------------------------------------------------------------------------------------------------------------------------------------------------------------------------------------------------------------------------------------------------------------------------------------------------------------------------------------------------------------------------------------------------------------------------------------------------------------------------------------------------------------------------------------------------------------------------------------------------------------------------------------------------------------------------------------------------------------------------------------------------------------------------------------------------------------------------------------------------------------------------------------------------------------------------------------------------------------------------------------------------------------------------------------------------------------------------------------------------------------------------------------------------------------------------------------------------------------------------------------------------------------------------------------------------------------------------------------------------------------------------------------------------------------------------------------------------------------------------------------------------------------------------------------------------------------------------------------------------------------------------------------------------------------------------------------------------------------------------------------------------------------------------------------------------------------------------------------------------------------------------------------------------------------------------------------------------------------------------------------------------------------------------------------------------------------------------------------------------------------------------------------------------------------------------------------------------------------------------------------------------------------------------------------------------------------------------------------------------------------------------------------------------------------------------------------------------------------------------------------------------------------------------------------------------------------------------------------------------------------------------------------------------------------------------------------------------------------------------------------------------------------------------------------------------------------------------------------------------------------------------------------------------------------------------------------------------------------------------------------------------------------------------------------------------------------------------------------------------------------------------------------------------------------------------------------------------------------------------------------------------------------------------------------------------------------------------------------------------------------------------------------------------------------------------------------------------------------------------------------------------------------------------------------------------------------------------------------------------------------------------------------------------------------------------------------------------------------------------------------------------------------------------------------------------------------------------------------------------------------------------------------------------------------------------------------------------------------------------------------------------------------------------------------------------------------------------------------------------------------------------------------------------------------------------------------------------------------------------------------------------------------------------------------------------------------------------------------------------------------------------------------------------------------------------------------------------------------------------------------------------------------------------------------------------------------------------------------------------------------------------------------------------------------------------------------------------------------------------------------------------------------------------------------------------------------------------------------------------------------------------------------------------------------------------------------------------------------------------------------------------------------------------------|-----------|----------|------|--------|-------|------|----------|-----------|
|                                                   | Wins | Losses | Total | Rate | Win List                                                                                                                                                                                                                                                                                                                                                                                                                                                                                                                                                                                                                                                                                                                                                                                                                                                                                                                                                                                                                                                                                                                                                                                                                                                                                                                                                                                                                                                                                                                                                                                                                                                                                                                                                                                                                                                                                                                                                                                                                                                                                                                                                                                                                                                                                                                                                                                                                                                                                                                                                                                                                                                                                                                                                                                                                                                                                                                                                                                                                                                                                                                                                                                                                                                                                                                                                                                                                                                                                                                                                                                                                                                                                                                                                                                                                                                                                                                                                                                                                                                                                                                                                                                                                                                                                                                                                                                                                                                                                                                                                                                                                                                                                                                                                                                                                                                                                                                                                                                                                                                                                                                                                                                                                                                                                                                                                                                                                                                                                                                                                                                                                                                                                                                                                                                                                                                                                                                                                                                                                                                                                                                                                                                                                                                                                                                                                                                                                                                                                                                                                                                                                                                                                                                                                                                                                                                                                                                                                                                                                                                                                                                                                                                                                                                                                                                                                                                                                                                                                                                                                                                                                                                                                                                                                                                                                                                                                                                                                                                                                                                                                                                                                                                                                                                                                                                                                                                                                                                                                                                                                                                                                                                                                                                                                                                                                                                                                                                                                                                                                                                                                                                                                                                                                                                                                                                                                                                                                                                                                                                                                                                                                                                                                                                                                                                                                                                                                                                                                                                                                                                                                                                                                                                                                                                                                                                                                                                                                                                                                                                                                                                                                                                                                                                                                                                                                                                                                                                                                                                                                                                                                                                                                                                                                                                                                                                                                                                                                                                                                                                                                                                                                                                                                                                                                                                                                                                                                                                                                                                                             | Loss List | Evidence | Wins | Losses | Total | Rate | Win List | Loss List |
| CE.a0.5.bschedulert<br>to 0.05.gschedul<br>to 0.2 | 14   | 0      | 14    | 1.00 | CE.a0.5.b0.g0,<br>CE.a0.5.b0.gschedul<br>to 0.2,CE.a0.5.bschedul<br>to 0.05.g0,CE.a1.b0.g0,<br>CE.a1.b0.gschedul to<br>0.2,CE.a1.bschedul<br>to 0.05.g0,CE.a1.bschedul<br>to |           |          |      |        |       |      |          |           |

Table 29: Practical evidence assessment of loss ablations in the SSVEP task (Part 2 of 2)

| Config                                                | Seen |        |       |                                                                                                                                  |                                                                                                                                                                                                                                                                                                                                                                                          | Unseen                                                                                                                                                                                                                                                                                                                                                                                                       |            |      |        |       |                                                                                                                                                                                                                                                                                                                                                                                                                                          |                                                                                                                                                                                                                                                                                                                                                                                                                                                                                                         |                                                                                                                                                                                                                                                                                                            |                         |
|-------------------------------------------------------|------|--------|-------|----------------------------------------------------------------------------------------------------------------------------------|------------------------------------------------------------------------------------------------------------------------------------------------------------------------------------------------------------------------------------------------------------------------------------------------------------------------------------------------------------------------------------------|--------------------------------------------------------------------------------------------------------------------------------------------------------------------------------------------------------------------------------------------------------------------------------------------------------------------------------------------------------------------------------------------------------------|------------|------|--------|-------|------------------------------------------------------------------------------------------------------------------------------------------------------------------------------------------------------------------------------------------------------------------------------------------------------------------------------------------------------------------------------------------------------------------------------------------|---------------------------------------------------------------------------------------------------------------------------------------------------------------------------------------------------------------------------------------------------------------------------------------------------------------------------------------------------------------------------------------------------------------------------------------------------------------------------------------------------------|------------------------------------------------------------------------------------------------------------------------------------------------------------------------------------------------------------------------------------------------------------------------------------------------------------|-------------------------|
|                                                       | Wins | Losses | Total | Rate                                                                                                                             | Win List                                                                                                                                                                                                                                                                                                                                                                                 | Loss List                                                                                                                                                                                                                                                                                                                                                                                                    | Evidence   | Wins | Losses | Total | Rate                                                                                                                                                                                                                                                                                                                                                                                                                                     | Win List                                                                                                                                                                                                                                                                                                                                                                                                                                                                                                | Loss List                                                                                                                                                                                                                                                                                                  | Evidence                |
| MSE.a0.5.bschedulr<br>to<br>0.05_gscheduler<br>to 0.2 | 7    | 12     | 0.42  | CE.a0.5.b0_g0,<br>CE.a0.5.b0_gscheduler<br>to 0.2,CE.a1.b0_g0,<br>CE.a1.b0_gscheduler to<br>0.2,MSE.a0.5.bschedulr to<br>0.05_g0 | CE.a0.5.bschedulr<br>to 0.05_g0,<br>CE.a0.5.bschedulr<br>to 0.05_gscheduler to<br>0.2,MSE.a0.5.b0_g0,<br>MSE.a1.b0_g0,<br>MSE.a1.b0_gscheduler to<br>0.2,MSE.a1.bschedulr<br>to 0.05_g0,<br>MSE.a1.bschedulr to<br>0.05_gscheduler to 0.2                                                                                                                                                | Weak:3,<br>Minimal:2                                                                                                                                                                                                                                                                                                                                                                                         | 1          | 13   | 14     | 0.07  | MSE.a0.5.bschedulr<br>to<br>0.05_g0                                                                                                                                                                                                                                                                                                                                                                                                      | CE.a0.5.b0_g0,<br>CE.a0.5.bschedulr<br>to 0.05_g0,<br>CE.a0.5.bschedulr<br>to 0.05_gscheduler<br>to 0.2,CE.a1.b0_g0,<br>CE.a1.b0_gscheduler to<br>0.2,CE.a1.bschedulr<br>to 0.05_g0,CE.a1.bschedulr<br>to 0.05_gscheduler to<br>0.2,MSE.a0.5.b0_g0,<br>MSE.a0.5.b0_gscheduler<br>to 0.2,MSE.a1.b0_g0,<br>MSE.a1.b0_gscheduler to<br>0.05_g0,CE.a1.b0_g0,<br>MSE.a1.bschedulr to<br>0.05_g0,CE.a1.bschedulr<br>to 0.05_g0,<br>MSE.a1.bschedulr to<br>0.05_gscheduler to 0.2                              | Minimal:1                                                                                                                                                                                                                                                                                                  |                         |
| MSE.a0.5.b0_gschdule<br>to 0.2                        | 6    | 10     | 0.40  | CE.a0.5.b0_g0,<br>CE.a1.b0_gschdule to<br>0.2, MSE.a0.5.bschedulr<br>to 0.05_g0                                                  | CE.a0.5.bschedulr<br>to 0.05_g0,<br>CE.a0.5.bschedulr<br>to 0.05_gscheduler to<br>0.2, MSE.a1.b0_g0,<br>MSE.a1.b0_gschdule<br>to 0.2, MSE.a1.bschedulr<br>to 0.05_g0,<br>MSE.a1.bschedulr to<br>0.05_gscheduler to 0.2                                                                                                                                                                   | Minimal:2,<br>Weak:2                                                                                                                                                                                                                                                                                                                                                                                         | 10         | 1    | 11     | 0.91  | CE.a0.5.b0_g0,<br>CE.a0.5.b0_gschdule to<br>0.2,CE.a0.5.bschedulr<br>to 0.05_g0,<br>CE.a0.5.bschedulr to<br>0.05_gscheduler to 0.2,<br>CE.a1.b0_gschdule to<br>0.2,CE.a1.bschedulr<br>to 0.05_g0,<br>MSE.a0.5.bschedulr<br>to 0.05_g0,<br>MSE.a0.5.bschedulr<br>to 0.05_gscheduler<br>to 0.05_g0,<br>MSE.a0.5.bschedulr<br>to 0.05_gscheduler to<br>0.2,MSE.a1.bschedulr<br>to 0.05_g0,<br>MSE.a1.bschedulr to<br>0.05_gscheduler to 0.2 | Strong:5,<br>Mod-<br>erate:2,<br>Mini-<br>mal:2,<br>Weak:1                                                                                                                                                                                                                                                                                                                                                                                                                                              |                                                                                                                                                                                                                                                                                                            |                         |
| CE.a0.5.b0_gschdule<br>to 0.2                         | 10   | 11     | 0.09  | CE.a1.b0_g0                                                                                                                      | CE.a0.5.bschedulr<br>to 0.05_g0,<br>CE.a0.5.bschedulr to<br>0.05_gscheduler to 0.2,<br>CE.a1.bschedulr to<br>0.05_g0,CE.a1.bschedulr<br>to 0.05_gscheduler to<br>0.2,MSE.a0.5.b0_g0,<br>MSE.a0.5.bschedulr<br>to 0.05_gscheduler to<br>0.2,MSE.a1.b0_g0,<br>MSE.a1.b0_gschdule<br>to 0.2,MSE.a1.bschedulr<br>to 0.05_g0,<br>MSE.a1.bschedulr to<br>0.05_gscheduler to 0.2                | Weak:1                                                                                                                                                                                                                                                                                                                                                                                                       | 1          | 13   | 14     | 0.07  | MSE.a0.5.bschedulr<br>to<br>0.05_g0                                                                                                                                                                                                                                                                                                                                                                                                      | CE.a0.5.b0_g0,<br>CE.a0.5.bschedulr<br>to 0.05_g0,<br>CE.a0.5.bschedulr<br>to 0.05_gscheduler<br>to 0.2,CE.a1.b0_g0,<br>CE.a1.b0_gschdule to<br>0.05_g0,CE.a1.bschedulr<br>to 0.05_gscheduler to<br>0.2,CE.a1.bschedulr<br>to 0.05_g0,CE.a1.bschedulr<br>to 0.05_gscheduler to<br>0.2,MSE.a1.b0_g0,<br>MSE.a0.5.b0_gschdule<br>to 0.2,MSE.a1.b0_g0,<br>MSE.a1.b0_gschdule<br>to 0.2,MSE.a1.bschedulr<br>to 0.05_g0,<br>MSE.a1.bschedulr to<br>0.05_g0,<br>MSE.a1.bschedulr to<br>0.05_gscheduler to 0.2 | Moderate:1                                                                                                                                                                                                                                                                                                 |                         |
| CE.a0.5.b0_g0                                         | 1    | 11     | 12    | 0.08                                                                                                                             | CE.a1.b0_g0                                                                                                                                                                                                                                                                                                                                                                              | CE.a0.5.bschedulr<br>to 0.05_g0,<br>CE.a0.5.bschedulr to<br>0.05_gscheduler to 0.2,<br>CE.a1.bschedulr to<br>0.05_g0,CE.a1.bschedulr<br>to 0.05_gscheduler to<br>0.2,MSE.a0.5.b0_g0,<br>MSE.a0.5.bschedulr<br>to 0.05_gscheduler to<br>0.2,MSE.a1.b0_g0,<br>MSE.a1.b0_gschdule<br>to 0.2,MSE.a1.bschedulr<br>to 0.05_g0,<br>MSE.a1.bschedulr to<br>0.05_g0,<br>MSE.a1.bschedulr to<br>0.05_gscheduler to 0.2 | Moderate:1 | 3    | 10     | 13    | 0.23                                                                                                                                                                                                                                                                                                                                                                                                                                     | CE.a0.5.b0_gschdule to<br>0.2,MSE.a0.5.bschedulr<br>to 0.05_g0,<br>MSE.a0.5.bschedulr<br>to 0.05_gscheduler to 0.2                                                                                                                                                                                                                                                                                                                                                                                      | CE.a0.5.b0_g0,<br>CE.a0.5.bschedulr to<br>0.05_g0,CE.a1.b0_g0,<br>CE.a1.b0_gschdule to<br>0.2,CE.a1.bschedulr<br>to 0.05_g0,CE.a1.bschedulr<br>to 0.05_gscheduler to<br>0.2,MSE.a0.5.b0_g0,<br>MSE.a0.5.b0_gschdule<br>to 0.2,MSE.a1.b0_g0,<br>MSE.a1.b0_gschdule<br>to 0.2,MSE.a1.bschedulr<br>to 0.05_g0 | Moderate:2,<br>Strong:1 |
| CE.a1.b0_gschdule<br>to 0.2                           | 11   | 12     | 0.08  | CE.a1.b0_g0                                                                                                                      | CE.a0.5.bschedulr<br>to 0.05_g0,<br>CE.a0.5.bschedulr to<br>0.05_gscheduler to 0.2,<br>CE.a1.bschedulr to<br>0.05_g0,CE.a1.bschedulr<br>to 0.05_gscheduler to<br>0.2,MSE.a0.5.b0_g0,<br>MSE.a0.5.b0_gschdule<br>to 0.2,MSE.a1.b0_g0,<br>MSE.a1.b0_gschdule<br>to 0.2,MSE.a1.bschedulr<br>to 0.05_g0,<br>MSE.a1.bschedulr to<br>0.05_g0,<br>MSE.a1.bschedulr to<br>0.05_gscheduler to 0.2 | Weak:1                                                                                                                                                                                                                                                                                                                                                                                                       | 6          | 7    | 13     | 0.46  | CE.a0.5.b0_g0,<br>CE.a0.5.b0_gschdule to<br>0.2,CE.a0.5.bschedulr<br>to 0.05_g0,<br>MSE.a0.5.bschedulr<br>to 0.05_g0,<br>MSE.a0.5.bschedulr<br>to 0.05_gscheduler to 0.2,<br>MSE.a1.b0_g0,<br>MSE.a1.b0_gschdule to<br>0.2,MSE.a1.bschedulr<br>to 0.05_g0,<br>MSE.a1.bschedulr to<br>0.05_gscheduler to 0.2                                                                                                                              | CE.a1.b0_g0,<br>CE.a1.bschedulr to<br>0.05_g0,CE.a1.bschedulr<br>to 0.05_gscheduler to<br>0.2,MSE.a0.5.b0_g0,<br>MSE.a0.5.b0_gschdule<br>to 0.2,MSE.a1.b0_g0,<br>MSE.a1.b0_gschdule<br>to 0.2,MSE.a1.bschedulr<br>to 0.05_g0,<br>MSE.a1.bschedulr to<br>0.05_g0                                                                                                                                                                                                                                         | Moderate:2,<br>Strong:2,<br>Mini-<br>mal:1,<br>Weak:1                                                                                                                                                                                                                                                      |                         |
| MSE.a0.5.bschedulr<br>to 0.05_g0                      | 11   | 12     | 0.08  | CE.a1.b0_g0                                                                                                                      | CE.a0.5.bschedulr<br>to 0.05_g0,<br>CE.a0.5.bschedulr to<br>0.05_gscheduler to 0.2,<br>CE.a1.bschedulr to<br>0.05_g0,CE.a1.bschedulr<br>to 0.05_gscheduler to<br>0.2,MSE.a0.5.b0_g0,<br>MSE.a0.5.b0_gschdule<br>to 0.2,MSE.a1.b0_g0,<br>MSE.a1.b0_gschdule<br>to 0.2,MSE.a1.bschedulr<br>to 0.05_g0,<br>MSE.a1.bschedulr to<br>0.05_g0,<br>MSE.a1.bschedulr to<br>0.05_gscheduler to 0.2 | Weak:1                                                                                                                                                                                                                                                                                                                                                                                                       | 0          | 15   | 15     | 0.00  | —                                                                                                                                                                                                                                                                                                                                                                                                                                        | CE.a0.5.b0_g0,<br>CE.a0.5.b0_gschdule to<br>0.2,CE.a0.5.bschedulr<br>to 0.05_g0,<br>CE.a0.5.bschedulr<br>to 0.05_gscheduler<br>to 0.2,CE.a1.b0_g0,<br>CE.a1.b0_gschdule to<br>0.2,CE.a1.bschedulr<br>to 0.05_g0,CE.a1.bschedulr<br>to 0.05_gscheduler to<br>0.2,MSE.a0.5.b0_g0,<br>MSE.a0.5.b0_gschdule<br>to 0.2,MSE.a1.b0_g0,<br>MSE.a1.b0_gschdule<br>to 0.2,MSE.a1.bschedulr<br>to 0.05_g0,<br>MSE.a1.bschedulr to<br>0.05_g0,<br>MSE.a1.bschedulr to<br>0.05_gscheduler to 0.2                     | —                                                                                                                                                                                                                                                                                                          |                         |
| CE.a1.b0_g0                                           | —    | 0      | 15    | 15                                                                                                                               | 0.00                                                                                                                                                                                                                                                                                                                                                                                     | —                                                                                                                                                                                                                                                                                                                                                                                                            | —          | 9    | 0      | 9     | 1.00                                                                                                                                                                                                                                                                                                                                                                                                                                     | CE.a0.5.b0_g0,<br>CE.a0.5.b0_gschdule to<br>0.2,CE.a0.5.bschedulr<br>to 0.05_g0,<br>CE.a0.5.bschedulr to<br>0.05_gscheduler to 0.2,<br>CE.a1.b0_gschdule to<br>0.2,CE.a1.bschedulr<br>to 0.05_g0,CE.a1.bschedulr<br>to 0.05_gscheduler to<br>0.2,MSE.a0.5.b0_g0,<br>MSE.a0.5.bschedulr<br>to 0.05_gscheduler to<br>0.2,MSE.a1.b0_g0,<br>MSE.a1.b0_gschdule<br>to 0.2,MSE.a1.bschedulr<br>to 0.05_g0,<br>MSE.a1.bschedulr to<br>0.05_g0,<br>MSE.a1.bschedulr to<br>0.05_gscheduler to 0.2                | Strong:6,<br>Mod-<br>erate:2,<br>Weak:1                                                                                                                                                                                                                                                                    |                         |

Each row shows win/loss stats and qualitative evidence for seen and unseen subject comparisons.

Table 30: Practical evidence assessment of decoder input ablations in the P300 task

| Config            | Seen |        |       |       |                                                            |                                                                                                           |                                   | Unseen |        |       |      |                                                                                                   |                                                                                                           |                                  |
|-------------------|------|--------|-------|-------|------------------------------------------------------------|-----------------------------------------------------------------------------------------------------------|-----------------------------------|--------|--------|-------|------|---------------------------------------------------------------------------------------------------|-----------------------------------------------------------------------------------------------------------|----------------------------------|
|                   | Wins | Losses | Total | Rate  | Win List                                                   | Loss List                                                                                                 | Evidence                          | Wins   | Losses | Total | Rate | Win List                                                                                          | Loss List                                                                                                 | Evidence                         |
| x + skips         | 4    | 0      | 4     | 1.00  | skips<br>x + x_hat + skips<br>z + x<br>z only              | —                                                                                                         | Moderate:2<br>Weak:1<br>Minimal:1 | 1      | 3      | 4     | 0.25 | skips                                                                                             | x_hat + skips<br>z + x_hat<br>z only                                                                      | Weak:1                           |
| z + x_hat         | 5    | 0      | 5     | 1.00  | skips<br>x + x_hat<br>x + x_hat + skips<br>z + x<br>z only | —                                                                                                         | Minimal:3<br>Moderate:2           | 3      | 1      | 4     | 0.75 | skips<br>x + skips<br>x + x_hat                                                                   | x_hat + skips                                                                                             | Weak:2<br>Moderate:1             |
| x_hat + skips     | 2    | 0      | 2     | 1.00  | skips<br>x + x_hat + skips                                 | —                                                                                                         | Weak:1<br>Moderate:1              | 8      | 0      | 8     | 1.00 | skips<br>x + skips<br>x + x_hat<br>x + x_hat + skips<br>z + skips<br>z + x<br>z + x_hat<br>z only | —                                                                                                         | Strong:5<br>Moderate:2<br>Weak:1 |
| z + skips         | 3    | 0      | 3     | 1.00  | skips<br>x + x_hat + skips<br>z + x                        | —                                                                                                         | Minimal:2<br>Moderate:1           | 1      | 1      | 2     | 0.50 | skips                                                                                             | x_hat + skips                                                                                             | Strong:1                         |
| x + x_hat         | 3    | 1      | 4     | 0.75  | skips<br>x + x_hat + skips<br>z + x                        | z + x_hat                                                                                                 | Minimal:2<br>Moderate:1           | 1      | 3      | 4     | 0.25 | skips                                                                                             | x_hat + skips<br>z + x_hat<br>z only                                                                      | Moderate:1                       |
| z only            | 2    | 2      | 4     | 0.50  | skips<br>x + x_hat + skips                                 | x + skips<br>z + x_hat                                                                                    | Minimal:1<br>Moderate:1           | 3      | 1      | 4     | 0.75 | skips<br>x + skips<br>x + x_hat                                                                   | x_hat + skips                                                                                             | Moderate:2<br>Weak:1             |
| z + x             | 1    | 4      | 5     | 0.20  | skips                                                      | x + skips<br>x + x_hat<br>z + skips<br>z + x_hat                                                          | Moderate:1                        | 1      | 1      | 2     | 0.50 | skips                                                                                             | x_hat + skips                                                                                             | Strong:1                         |
| x + x_hat + skips | 1    | 6      | 7     | 0.143 | skips                                                      | x + skips<br>x + x_hat<br>x_hat + skips<br>z + skips<br>z + x_hat<br>z only                               | Minimal:1                         | 1      | 1      | 2     | 0.50 | skips                                                                                             | x_hat + skips                                                                                             | Weak:1                           |
| skips             | 0    | 8      | 8     | 0.00  | —                                                          | x + skips<br>x + x_hat<br>x + x_hat + skips<br>x_hat + skips<br>z + skips<br>z + x<br>z + x_hat<br>z only | —                                 | 0      | 8      | 8     | 0.00 | —                                                                                                 | x + skips<br>x + x_hat<br>x + x_hat + skips<br>x_hat + skips<br>z + skips<br>z + x<br>z + x_hat<br>z only | —                                |

Each configuration’s wins, losses, total comparisons, and win rate are reported, along with the corresponding lists of winning and losing opponents and an evidence summary.

Table 31: Practical evidence assessment of classifier type ablations in the P300 task

| Config                        | Seen |        |       |      |                                                                                                                                                    |                                                                                                                                                |                        | Unseen |        |       |      |                                                                                                                                                    |                                                                                                                             |                                  |
|-------------------------------|------|--------|-------|------|----------------------------------------------------------------------------------------------------------------------------------------------------|------------------------------------------------------------------------------------------------------------------------------------------------|------------------------|--------|--------|-------|------|----------------------------------------------------------------------------------------------------------------------------------------------------|-----------------------------------------------------------------------------------------------------------------------------|----------------------------------|
|                               | Wins | Losses | Total | Rate | Win List                                                                                                                                           | Loss List                                                                                                                                      | Evidence               | Wins   | Losses | Total | Rate | Win List                                                                                                                                           | Loss List                                                                                                                   | Evidence                         |
| cegnet_classifier_x           | 6    | 0      | 6     | 1.00 | cegnet_classifier_decoder.out<br>cegnet_classifier_x_hat<br>fc_classifier_decoder.out<br>fc_classifier_x<br>fc_classifier_x_hat<br>fc_classifier_z | —                                                                                                                                              | Strong:6               | 6      | 0      | 6     | 1.00 | cegnet_classifier_decoder.out<br>cegnet_classifier_x_hat<br>fc_classifier_decoder.out<br>fc_classifier_x<br>fc_classifier_x_hat<br>fc_classifier_z | —                                                                                                                           | Strong:6                         |
| fc_classifier_z               | 4    | 1      | 5     | 0.80 | cegnet_classifier_decoder.out<br>cegnet_classifier_x_hat<br>fc_classifier_x<br>fc_classifier_x_hat                                                 | cegnet_classifier_x                                                                                                                            | Strong:3<br>Weak:1     | 0      | 5      | 5     | 0.00 | —                                                                                                                                                  | cegnet_classifier_decoder.out<br>cegnet_classifier_x<br>fc_classifier_decoder.out<br>fc_classifier_x<br>fc_classifier_x_hat | —                                |
| fc_classifier_decoder.out     | 4    | 1      | 5     | 0.80 | cegnet_classifier_decoder.out<br>cegnet_classifier_x_hat<br>fc_classifier_x<br>fc_classifier_x_hat                                                 | cegnet_classifier_x                                                                                                                            | Strong:3<br>Moderate:1 | 5      | 1      | 6     | 0.83 | cegnet_classifier_decoder.out<br>cegnet_classifier_x_hat<br>fc_classifier_x<br>fc_classifier_x_hat<br>fc_classifier_z                              | cegnet_classifier_x<br>cegnet_classifier_x_hat                                                                              | Strong:2<br>Weak:2<br>Moderate:1 |
| cegnet_classifier_decoder.out | 3    | 3      | 6     | 0.50 | cegnet_classifier_x_hat<br>fc_classifier_x<br>fc_classifier_x_hat<br>cegnet_classifier_x_hat                                                       | cegnet_classifier_x<br>fc_classifier_decoder.out<br>fc_classifier_z                                                                            | Weak:2<br>Strong:1     | 2      | 2      | 4     | 0.50 | cegnet_classifier_x_hat<br>fc_classifier_z                                                                                                         | cegnet_classifier_x<br>fc_classifier_decoder.out                                                                            | Strong:2                         |
| fc_classifier_x               | 1    | 4      | 5     | 0.20 | cegnet_classifier_x_hat                                                                                                                            | cegnet_classifier_decoder.out<br>cegnet_classifier_x<br>fc_classifier_decoder.out<br>fc_classifier_z                                           | Strong:1               | 2      | 2      | 4     | 0.50 | cegnet_classifier_x_hat<br>fc_classifier_z                                                                                                         | cegnet_classifier_x<br>fc_classifier_decoder.out                                                                            | Strong:2                         |
| fc_classifier_x_hat           | 1    | 4      | 5     | 0.20 | cegnet_classifier_x_hat                                                                                                                            | cegnet_classifier_decoder.out<br>cegnet_classifier_x<br>fc_classifier_decoder.out<br>fc_classifier_z                                           | Strong:1               | 2      | 2      | 4     | 0.50 | cegnet_classifier_x_hat<br>fc_classifier_z                                                                                                         | cegnet_classifier_x<br>fc_classifier_decoder.out                                                                            | Strong:2                         |
| cegnet_classifier_x_hat       | 0    | 6      | 6     | 0.00 | —                                                                                                                                                  | cegnet_classifier_decoder.out<br>cegnet_classifier_x<br>fc_classifier_decoder.out<br>fc_classifier_x<br>fc_classifier_x_hat<br>fc_classifier_z | —                      | 0      | 5      | 5     | 0.00 | —                                                                                                                                                  | cegnet_classifier_decoder.out<br>cegnet_classifier_x<br>fc_classifier_decoder.out<br>fc_classifier_x<br>fc_classifier_x_hat | —                                |

Each configuration’s wins, losses, total comparisons, and win rate are reported, along with the corresponding lists of winning and losing opponents and an evidence summary.



Table 32: Practical evidence assessment of architecture ablations in the P300 task

| Config                     | Seen |        |       |      |                            |                        |                       | Unseen |        |       |      |                            |                       |                                  |
|----------------------------|------|--------|-------|------|----------------------------|------------------------|-----------------------|--------|--------|-------|------|----------------------------|-----------------------|----------------------------------|
|                            | Wins | Losses | Total | Rate | Win List                   | Loss List              | Evidence              | Wins   | Losses | Total | Rate | Win List                   | Loss List             | Evidence                         |
| no_ddpm_x_no_decoder       | 2    | 0      | 2     | 1.00 | use_ddpm_x_hat_no_decoder  | —                      | Strong:2              | 2      | 1      | 3     | 0.67 | use_ddpm_x_hat_no_decoder  | use_ddpm_x_no_decoder | Strong:2                         |
| no_ddpm_x_use_decoder      | 2    | 0      | 2     | 1.00 | use_ddpm_x_hat_use_decoder | —                      | Strong:2              | 2      | 1      | 3     | 0.67 | use_ddpm_x_hat_no_decoder  | use_ddpm_x_no_decoder | Strong:2                         |
| use_ddpm_x_no_decoder      | 3    | 0      | 3     | 1.00 | use_ddpm_x_hat_use_decoder | —                      | Strong:2<br>Minimal:1 | 5      | 0      | 5     | 1.00 | no_ddpm_x_no_decoder       | —                     | Moderate:2<br>Strong:2<br>Weak:1 |
| use_ddpm_x_use_decoder     | 2    | 1      | 3     | 0.67 | use_ddpm_x_hat_no_decoder  | use_ddpm_x_no_decoder  | Strong:2              | 2      | 1      | 3     | 0.67 | use_ddpm_x_hat_use_decoder | use_ddpm_x_no_decoder | Strong:2                         |
| use_ddpm_x_hat_no_decoder  | 1    | 4      | 5     | 0.20 | use_ddpm_x_hat_use_decoder | no_ddpm_x_no_decoder   | Moderate:1            | 0      | 5      | 5     | 0.00 | —                          | no_ddpm_x_no_decoder  | —                                |
| use_ddpm_x_hat_use_decoder | 0    | 5      | 5     | 0.00 | —                          | no_ddpm_x_no_decoder   | —                     | 1      | 4      | 5     | 0.20 | use_ddpm_x_hat_no_decoder  | no_ddpm_x_no_decoder  | Moderate:1                       |
|                            |      |        |       |      |                            | no_ddpm_x_use_decoder  |                       |        |        |       |      | no_ddpm_x_use_decoder      | no_ddpm_x_use_decoder |                                  |
|                            |      |        |       |      |                            | use_ddpm_x_no_decoder  |                       |        |        |       |      | use_ddpm_x_hat_use_decoder | use_ddpm_x_no_decoder |                                  |
|                            |      |        |       |      |                            | use_ddpm_x_use_decoder |                       |        |        |       |      | —                          | —                     |                                  |

Each configuration’s wins, losses, total comparisons, and win rate are reported, along with the corresponding lists of winning and losing opponents and an evidence summary.

Table 33: Practical evidence assessment of mixup ablations in the P300 task (Part 1 of 2)

| Config          | Seen |        |       |      |                                                                                                                                                                    |                                  |                                     | Unseen |        |       |      |                                                                                                                                                                                                          |                                                                                                                                                                                                                             |                                    |
|-----------------|------|--------|-------|------|--------------------------------------------------------------------------------------------------------------------------------------------------------------------|----------------------------------|-------------------------------------|--------|--------|-------|------|----------------------------------------------------------------------------------------------------------------------------------------------------------------------------------------------------------|-----------------------------------------------------------------------------------------------------------------------------------------------------------------------------------------------------------------------------|------------------------------------|
|                 | Wins | Losses | Total | Rate | Win List                                                                                                                                                           | Loss List                        | Evidence                            | Wins   | Losses | Total | Rate | Win List                                                                                                                                                                                                 | Loss List                                                                                                                                                                                                                   | Evidence                           |
| layer-1_randNo  | 6    | 0      | 6     | 1.00 | layer1_randNo,<br>layer1_randYes,<br>layer2_randNo,<br>layer2_randYes,<br>layer3_randNo,<br>layer3_randYes                                                         | —                                | Moderate:4,<br>Minimal:1,<br>Weak:1 | 11     | 0      | 11    | 1.00 | layer-1_randYes,<br>layer0_randNo,<br>layer0_randYes,<br>layer1_randNo,<br>layer1_randYes,<br>layer2_randNo,<br>layer2_randYes,<br>layer3_randNo,<br>layer3_randYes,<br>layer4_randNo,<br>layer4_randYes | —                                                                                                                                                                                                                           | Strong:9,<br>Minimal:2             |
| layer-1_randYes | 5    | 0      | 5     | 1.00 | layer1_randNo,<br>layer2_randNo,<br>layer2_randYes,<br>layer3_randNo,<br>layer3_randYes                                                                            | —                                | Moderate:3,<br>Weak:2               | 10     | 1      | 11    | 0.91 | layer0_randNo,<br>layer0_randYes,<br>layer1_randNo,<br>layer1_randYes,<br>layer2_randNo,<br>layer2_randYes,<br>layer3_randNo,<br>layer3_randYes,<br>layer4_randNo,<br>layer4_randYes                     | layer-1_randNo                                                                                                                                                                                                              | Strong:9,<br>Minimal:1             |
| layer0_randNo   | 9    | 0      | 9     | 1.00 | layer0_randYes,<br>layer1_randNo,<br>layer1_randYes,<br>layer2_randNo,<br>layer2_randYes,<br>layer3_randNo,<br>layer3_randYes,<br>layer4_randNo,<br>layer4_randYes | —                                | Weak:8,<br>Minimal:1                | 9      | 2      | 11    | 0.82 | layer0_randYes,<br>layer1_randNo,<br>layer1_randYes,<br>layer2_randNo,<br>layer2_randYes,<br>layer3_randNo,<br>layer3_randYes,<br>layer4_randNo,<br>layer4_randYes                                       | layer-1_randNo,<br>layer-1_randYes                                                                                                                                                                                          | Strong:6,<br>Moderate:2,<br>Weak:1 |
| layer0_randYes  | 6    | 1      | 7     | 0.86 | layer1_randNo,<br>layer2_randNo,<br>layer2_randYes,<br>layer3_randNo,<br>layer3_randYes,<br>layer4_randYes                                                         | layer0_randNo                    | Weak:5,<br>Minimal:1                | 7      | 3      | 10    | 0.70 | layer1_randNo,<br>layer1_randYes,<br>layer2_randNo,<br>layer2_randYes,<br>layer3_randNo,<br>layer3_randYes,<br>layer4_randNo,<br>layer4_randYes                                                          | layer-1_randNo,<br>layer-1_randYes,<br>layer0_randNo                                                                                                                                                                        | Strong:4,<br>Moderate:3            |
| layer4_randNo   | 5    | 1      | 6     | 0.83 | layer1_randNo,<br>layer2_randNo,<br>layer2_randYes,<br>layer3_randNo,<br>layer3_randYes                                                                            | layer0_randNo                    | Weak:5                              | 4      | 5      | 9     | 0.44 | layer1_randNo,<br>layer1_randYes,<br>layer2_randNo,<br>layer2_randYes,<br>layer3_randNo,<br>layer3_randYes                                                                                               | layer-1_randNo,<br>layer-1_randYes,<br>layer0_randNo,<br>layer0_randYes,<br>layer4_randYes                                                                                                                                  | Moderate:3,<br>Weak:1              |
| layer1_randYes  | 5    | 2      | 7     | 0.71 | layer1_randNo,<br>layer2_randNo,<br>layer2_randYes,<br>layer3_randNo,<br>layer3_randYes                                                                            | layer-1_randNo,<br>layer0_randNo | Moderate:5                          | 0      | 11     | 11    | 0.00 | —                                                                                                                                                                                                        | layer-1_randNo,<br>layer-1_randYes,<br>layer0_randNo,<br>layer0_randYes,<br>layer1_randNo,<br>layer1_randYes,<br>layer2_randNo,<br>layer2_randYes,<br>layer3_randNo,<br>layer3_randYes,<br>layer4_randNo,<br>layer4_randYes | —                                  |

Each row shows win/loss stats and qualitative evidence for seen and unseen subject comparisons.

Table 34: Practical evidence assessment of mixup ablations in the P300 task (Part 2 of 2)

| Config         | Seen |        |       |      |                                                                      |                                                                                                                                                                                                           |                       | Unseen |        |       |      |                                                                                                                              |                                                                                                                                                   |                                     |
|----------------|------|--------|-------|------|----------------------------------------------------------------------|-----------------------------------------------------------------------------------------------------------------------------------------------------------------------------------------------------------|-----------------------|--------|--------|-------|------|------------------------------------------------------------------------------------------------------------------------------|---------------------------------------------------------------------------------------------------------------------------------------------------|-------------------------------------|
|                | Wins | Losses | Total | Rate | Win List                                                             | Loss List                                                                                                                                                                                                 | Evidence              | Wins   | Losses | Total | Rate | Win List                                                                                                                     | Loss List                                                                                                                                         | Evidence                            |
| layer4_randYes | 5    | 2      | 7     | 0.71 | layer1_randNo,<br>layer2_randNo,<br>layer3_randNo,<br>layer3_randYes | layer0_randNo,<br>layer0_randYes                                                                                                                                                                          | Moderate:3,<br>Weak:2 | 7      | 3      | 10    | 0.70 | layer1_randNo,<br>layer1_randYes,<br>layer2_randNo,<br>layer2_randYes,<br>layer3_randNo,<br>layer3_randYes,<br>layer4_randNo | layer-1_randNo,<br>layer-1_randYes,<br>layer0_randNo                                                                                              | Strong:5,<br>Moderate:2             |
| layer3_randYes | 4    | 7      | 11    | 0.36 | layer1_randNo,<br>layer2_randNo,<br>layer2_randYes,<br>layer3_randNo | layer-1_randNo,<br>layer-1_randYes,<br>layer0_randNo,<br>layer0_randYes,<br>layer1_randYes,<br>layer4_randNo,<br>layer4_randYes                                                                           | Weak:3,<br>Minimal:1  | 1      | 5      | 6     | 0.17 | layer1_randYes                                                                                                               | layer-1_randNo,<br>layer-1_randYes,<br>layer0_randNo,<br>layer0_randYes,<br>layer4_randYes                                                        | Weak:1                              |
| layer1_randNo  | 3    | 8      | 11    | 0.27 | layer2_randNo,<br>layer2_randYes,<br>layer3_randNo                   | layer-1_randNo,<br>layer-1_randYes,<br>layer0_randNo,<br>layer0_randYes,<br>layer1_randYes,<br>layer3_randYes,<br>layer4_randNo,<br>layer4_randYes                                                        | Weak:2,<br>Minimal:1  | 1      | 8      | 9     | 0.11 | layer1_randYes                                                                                                               | layer-1_randNo,<br>layer-1_randYes,<br>layer0_randNo,<br>layer0_randYes,<br>layer2_randYes,<br>layer3_randNo,<br>layer4_randNo,<br>layer4_randYes | Moderate:1                          |
| layer2_randYes | 1    | 9      | 10    | 0.10 | layer2_randNo                                                        | layer-1_randNo,<br>layer-1_randYes,<br>layer0_randNo,<br>layer0_randYes,<br>layer1_randNo,<br>layer1_randYes,<br>layer3_randYes,<br>layer4_randNo,<br>layer4_randYes                                      | Weak:1                | 4      | 5      | 9     | 0.44 | layer1_randNo,<br>layer1_randYes,<br>layer2_randNo,<br>layer3_randNo                                                         | layer-1_randNo,<br>layer-1_randYes,<br>layer0_randNo,<br>layer0_randYes,<br>layer4_randYes                                                        | Moderate:1,<br>Weak:1,<br>Minimal:1 |
| layer3_randNo  | 1    | 9      | 10    | 0.10 | layer2_randNo                                                        | layer-1_randNo,<br>layer-1_randYes,<br>layer0_randNo,<br>layer0_randYes,<br>layer1_randNo,<br>layer1_randYes,<br>layer3_randYes,<br>layer4_randNo,<br>layer4_randYes                                      | Minimal:1             | 2      | 7      | 9     | 0.22 | layer1_randNo,<br>layer1_randYes                                                                                             | layer-1_randNo,<br>layer-1_randYes,<br>layer0_randNo,<br>layer0_randYes,<br>layer2_randYes,<br>layer4_randNo,<br>layer4_randYes                   | Weak:1,<br>Moderate:1               |
| layer2_randNo  | 0    | 11     | 11    | 0.00 | —                                                                    | layer-1_randNo,<br>layer-1_randYes,<br>layer0_randNo,<br>layer0_randYes,<br>layer1_randNo,<br>layer1_randYes,<br>layer2_randYes,<br>layer3_randNo,<br>layer3_randYes,<br>layer4_randNo,<br>layer4_randYes | —                     | 1      | 7      | 8     | 0.13 | layer1_randYes                                                                                                               | layer-1_randNo,<br>layer-1_randYes,<br>layer0_randNo,<br>layer0_randYes,<br>layer2_randYes,<br>layer4_randNo,<br>layer4_randYes                   | Strong:1                            |

Each row shows win/loss stats and qualitative evidence for seen and unseen subject comparisons.

Table 35: Practical evidence assessment of decoder input ablations in the MI task

| Config            | Seen |        |       |       |                                                                                                           |                                                                                                       |                        | Unseen |        |       |       |                                                                                                   |                                                                                              |                                               |
|-------------------|------|--------|-------|-------|-----------------------------------------------------------------------------------------------------------|-------------------------------------------------------------------------------------------------------|------------------------|--------|--------|-------|-------|---------------------------------------------------------------------------------------------------|----------------------------------------------------------------------------------------------|-----------------------------------------------|
|                   | Wins | Losses | Total | Rate  | Win List                                                                                                  | Loss List                                                                                             | Evidence               | Wins   | Losses | Total | Rate  | Win List                                                                                          | Loss List                                                                                    | Evidence                                      |
| x_hat + skips     | 2    | 4      | 6     | 0.333 | x + x_hat + skips<br>z + skips                                                                            | x + skips<br>z + x<br>z + x_hat<br>z only                                                             | Weak:2                 | 5      | 0      | 5     | 1.00  | skips<br>x + skips<br>x + x_hat<br>x + x_hat + skips<br>z + skips<br>z + x<br>z + x_hat<br>z only | —                                                                                            | Strong:5<br>Moderate:2<br>Weak:1              |
| x + x_hat + skips | 1    | 6      | 7     | 0.143 | z + skips                                                                                                 | x + skips<br>x + x_hat<br>x_hat + skips<br>z + x<br>z + x_hat<br>z only                               | Minimal:1              | 2      | 5      | 7     | 0.286 | skips<br>z + skips                                                                                | x + skips<br>x + x_hat<br>x_hat + skips<br>z + x<br>z + x_hat                                | Weak:1<br>Moderate:1                          |
| x + skips         | 3    | 2      | 5     | 0.60  | x + x_hat + skips<br>x_hat + skips<br>z + skips                                                           | z + x<br>z only                                                                                       | Weak:2<br>Moderate:1   | 5      | 0      | 5     | 1.00  | skips<br>x + x_hat + skips<br>z + skips<br>z + x_hat<br>z only                                    | —                                                                                            | Strong:2<br>Weak:1<br>Minimal:1<br>Moderate:1 |
| z + skips         | 0    | 8      | 8     | 0.00  | —                                                                                                         | skips<br>x + skips<br>x + x_hat<br>x + x_hat + skips<br>x_hat + skips<br>z + x<br>z + x_hat<br>z only | —                      | 0      | 7      | 7     | 0.00  | —                                                                                                 | x + skips<br>x + x_hat<br>x + x_hat + skips<br>x_hat + skips<br>z + x<br>z + x_hat<br>z only | —                                             |
| x + x_hat         | 3    | 3      | 6     | 0.50  | skips<br>x + x_hat + skips<br>z + skips                                                                   | z + x<br>z + x_hat<br>z only                                                                          | Weak:2<br>Strong:1     | 4      | 0      | 4     | 1.00  | skips<br>x + x_hat + skips<br>z + skips<br>z only                                                 | —                                                                                            | Strong:2<br>Weak:1<br>Moderate:1              |
| z only            | 7    | 1      | 8     | 0.875 | skips<br>x + skips<br>x + x_hat<br>x + x_hat + skips<br>x_hat + skips<br>z + skips<br>z + x_hat           | z + x                                                                                                 | Strong:4<br>Weak:3     | 2      | 4      | 6     | 0.333 | skips<br>z + skips                                                                                | x + skips<br>x + x_hat<br>x_hat + skips<br>z + x                                             | Moderate:2                                    |
| z + x_hat         | 5    | 2      | 7     | 0.714 | skips<br>x + x_hat<br>x + x_hat + skips<br>x_hat + skips<br>z + skips                                     | z + x<br>z only                                                                                       | Strong:3<br>Weak:2     | 3      | 2      | 5     | 0.60  | skips<br>x + x_hat + skips<br>z + skips                                                           | x + skips<br>x_hat + skips                                                                   | Strong:2<br>Weak:1                            |
| z + x             | 8    | 0      | 8     | 1.00  | skips<br>x + skips<br>x + x_hat<br>x + x_hat + skips<br>x_hat + skips<br>z + skips<br>z + x_hat<br>z only | —                                                                                                     | Strong:5<br>Moderate:3 | 4      | 0      | 4     | 1.00  | skips<br>x + x_hat + skips<br>z + skips<br>z only                                                 | —                                                                                            | Weak:2<br>Strong:2                            |
| skips             | 1    | 4      | 5     | 0.20  | z + skips                                                                                                 | x + x_hat<br>z + x<br>z + x_hat<br>z only                                                             | Strong:1               | 0      | 7      | 7     | 0.00  | —                                                                                                 | x + skips<br>x + x_hat<br>x + x_hat + skips<br>x_hat + skips<br>z + x<br>z + x_hat<br>z only | —                                             |

Each configuration’s wins, losses, total comparisons, and win rate are reported, along with the corresponding lists of winning and losing opponents and an evidence summary.

Table 36: Practical evidence assessment of classifier type ablations in the MI task

| Config                       | Seen |        |       |      |                                                                                                                                                  |                                                                                                                                                                        |                        | Unseen |        |       |      |                                                                                                                                                  |                                                                                                                                                                        |                        |
|------------------------------|------|--------|-------|------|--------------------------------------------------------------------------------------------------------------------------------------------------|------------------------------------------------------------------------------------------------------------------------------------------------------------------------|------------------------|--------|--------|-------|------|--------------------------------------------------------------------------------------------------------------------------------------------------|------------------------------------------------------------------------------------------------------------------------------------------------------------------------|------------------------|
|                              | Wins | Losses | Total | Rate | Win List                                                                                                                                         | Loss List                                                                                                                                                              | Evidence               | Wins   | Losses | Total | Rate | Win List                                                                                                                                         | Loss List                                                                                                                                                              | Evidence               |
| egnet_classifier_x           | 6    | 0      | 6     | 1.00 | egnet_classifier_decoder.out<br>egnet_classifier_x_hat<br>fc_classifier_decoder.out<br>fc_classifier_x<br>fc_classifier_x_hat<br>fc_classifier_z | —                                                                                                                                                                      | Strong:6               | 6      | 0      | 6     | 1.00 | egnet_classifier_decoder.out<br>egnet_classifier_x_hat<br>fc_classifier_decoder.out<br>fc_classifier_x<br>fc_classifier_x_hat<br>fc_classifier_z | —                                                                                                                                                                      | Strong:6               |
| fc_classifier_z              | 5    | 1      | 6     | 0.83 | egnet_classifier_decoder.out<br>egnet_classifier_x_hat<br>fc_classifier_decoder.out<br>fc_classifier_x<br>fc_classifier_x_hat                    | egnet_classifier_x                                                                                                                                                     | Strong:5               | 5      | 1      | 6     | 0.83 | egnet_classifier_decoder.out<br>egnet_classifier_x_hat<br>fc_classifier_decoder.out<br>fc_classifier_x<br>fc_classifier_x_hat                    | egnet_classifier_x                                                                                                                                                     | Strong:5               |
| egnet_classifier_decoder.out | 4    | 2      | 6     | 0.67 | egnet_classifier_x_hat<br>fc_classifier_decoder.out<br>fc_classifier_x<br>fc_classifier_x_hat                                                    | egnet_classifier_x<br>fc_classifier_z                                                                                                                                  | Strong:3<br>Moderate:1 | 4      | 2      | 6     | 0.67 | egnet_classifier_x_hat<br>fc_classifier_decoder.out<br>fc_classifier_x<br>fc_classifier_x_hat                                                    | egnet_classifier_x<br>fc_classifier_z                                                                                                                                  | Strong:3<br>Moderate:1 |
| fc_classifier_decoder.out    | 3    | 3      | 6     | 0.50 | egnet_classifier_x_hat<br>fc_classifier_x<br>fc_classifier_x_hat                                                                                 | egnet_classifier_decoder.out<br>egnet_classifier_x<br>fc_classifier_z                                                                                                  | Strong:3               | 3      | 3      | 6     | 0.50 | egnet_classifier_x_hat<br>fc_classifier_x<br>fc_classifier_x_hat                                                                                 | egnet_classifier_decoder.out<br>egnet_classifier_x<br>fc_classifier_z                                                                                                  | Strong:3               |
| fc_classifier_x              | 2    | 4      | 6     | 0.33 | egnet_classifier_x_hat<br>fc_classifier_x_hat                                                                                                    | egnet_classifier_decoder.out<br>fc_classifier_z<br>egnet_classifier_decoder.out<br>fc_classifier_x<br>fc_classifier_x_hat                                              | Strong:2               | 2      | 4      | 6     | 0.33 | egnet_classifier_x_hat<br>fc_classifier_x_hat                                                                                                    | egnet_classifier_decoder.out<br>fc_classifier_z<br>egnet_classifier_decoder.out<br>fc_classifier_x<br>fc_classifier_x_hat                                              | Strong:2               |
| egnet_classifier_x_hat       | 1    | 5      | 6     | 0.17 | fc_classifier_x_hat                                                                                                                              | egnet_classifier_decoder.out<br>egnet_classifier_x<br>egnet_classifier_decoder.out<br>fc_classifier_x<br>fc_classifier_z<br>egnet_classifier_decoder.out               | Strong:1               | 1      | 5      | 6     | 0.17 | fc_classifier_x_hat                                                                                                                              | egnet_classifier_decoder.out<br>egnet_classifier_x<br>egnet_classifier_decoder.out<br>fc_classifier_x<br>fc_classifier_z<br>egnet_classifier_decoder.out               | Strong:1               |
| fc_classifier_x_hat          | 0    | 6      | 6     | 0.00 | —                                                                                                                                                | egnet_classifier_decoder.out<br>egnet_classifier_x<br>egnet_classifier_x_hat<br>fc_classifier_decoder.out<br>fc_classifier_x<br>fc_classifier_x_hat<br>fc_classifier_z | —                      | 0      | 6      | 6     | 0.00 | —                                                                                                                                                | egnet_classifier_decoder.out<br>egnet_classifier_x<br>egnet_classifier_x_hat<br>fc_classifier_decoder.out<br>fc_classifier_x<br>fc_classifier_x_hat<br>fc_classifier_z | —                      |

Each configuration’s wins, losses, total comparisons, and win rate are reported, along with the corresponding lists of winning and losing opponents and an evidence summary.

Table 37: Practical evidence assessment of decoder input ablations in the MI task

| Config                     | Seen |        |       |      |                                                                                                               |                                                                                                                                       |                        | Unseen |        |       |      |                                                                                                                                       |                                                                                                                                       |                                  |
|----------------------------|------|--------|-------|------|---------------------------------------------------------------------------------------------------------------|---------------------------------------------------------------------------------------------------------------------------------------|------------------------|--------|--------|-------|------|---------------------------------------------------------------------------------------------------------------------------------------|---------------------------------------------------------------------------------------------------------------------------------------|----------------------------------|
|                            | Wins | Losses | Total | Rate | Win List                                                                                                      | Loss List                                                                                                                             | Evidence               | Wins   | Losses | Total | Rate | Win List                                                                                                                              | Loss List                                                                                                                             | Evidence                         |
| no_ddpm_x_use_decoder      | 4    | 0      | 4     | 1.00 | no_ddpm_x_no_decoder<br>use_ddpm_x_hat_no_decoder<br>use_ddpm_x_hat_no_decoder<br>use_ddpm_x_hat_use_decoder  | —                                                                                                                                     | Strong:3<br>Moderate:1 | 2      | 3      | 5     | 0.40 | use_ddpm_x_hat_no_decoder<br>use_ddpm_x_hat_no_decoder<br>use_ddpm_x_hat_no_decoder<br>use_ddpm_x_hat_use_decoder                     | no_ddpm_x_no_decoder<br>no_ddpm_x_no_decoder<br>use_ddpm_x_no_decoder<br>use_ddpm_x_use_decoder                                       | Strong:2                         |
| use_ddpm_x_use_decoder     | 4    | 0      | 4     | 1.00 | no_ddpm_x_no_decoder<br>use_ddpm_x_hat_no_decoder<br>use_ddpm_x_hat_no_decoder<br>use_ddpm_x_hat_use_decoder  | —                                                                                                                                     | Strong:4               | 3      | 1      | 4     | 0.75 | no_ddpm_x_use_decoder<br>use_ddpm_x_hat_no_decoder<br>use_ddpm_x_hat_no_decoder<br>use_ddpm_x_hat_use_decoder                         | use_ddpm_x_no_decoder                                                                                                                 | Strong:2<br>Weak:1               |
| no_ddpm_x_no_decoder       | 2    | 2      | 4     | 0.50 | use_ddpm_x_hat_no_decoder<br>use_ddpm_x_hat_no_decoder<br>use_ddpm_x_hat_use_decoder                          | no_ddpm_x_use_decoder<br>use_ddpm_x_hat_use_decoder                                                                                   | Strong:2               | 3      | 1      | 4     | 0.75 | no_ddpm_x_use_decoder<br>use_ddpm_x_hat_no_decoder<br>use_ddpm_x_hat_no_decoder<br>use_ddpm_x_hat_use_decoder                         | use_ddpm_x_no_decoder                                                                                                                 | Strong:3                         |
| use_ddpm_x_no_decoder      | 2    | 2      | 4     | 0.50 | use_ddpm_x_hat_no_decoder<br>use_ddpm_x_hat_no_decoder<br>use_ddpm_x_hat_use_decoder                          | no_ddpm_x_use_decoder<br>use_ddpm_x_hat_use_decoder                                                                                   | Strong:2               | 5      | 0      | 5     | 1.00 | no_ddpm_x_no_decoder<br>no_ddpm_x_use_decoder<br>use_ddpm_x_hat_no_decoder<br>use_ddpm_x_hat_no_decoder<br>use_ddpm_x_hat_use_decoder | —                                                                                                                                     | Strong:3<br>Weak:1<br>Moderate:1 |
| use_ddpm_x_hat_no_decoder  | 1    | 4      | 5     | 0.20 | use_ddpm_x_hat_use_decoder<br>no_ddpm_x_no_decoder<br>use_ddpm_x_hat_use_decoder<br>use_ddpm_x_hat_no_decoder | no_ddpm_x_no_decoder<br>no_ddpm_x_use_decoder<br>use_ddpm_x_hat_use_decoder<br>use_ddpm_x_hat_no_decoder                              | Strong:1               | 0      | 4      | 4     | 0.00 | —                                                                                                                                     | no_ddpm_x_no_decoder<br>no_ddpm_x_use_decoder<br>use_ddpm_x_hat_no_decoder<br>use_ddpm_x_hat_no_decoder<br>use_ddpm_x_hat_use_decoder | —                                |
| use_ddpm_x_hat_use_decoder | 0    | 5      | 5     | 0.00 | —                                                                                                             | no_ddpm_x_no_decoder<br>no_ddpm_x_use_decoder<br>use_ddpm_x_hat_no_decoder<br>use_ddpm_x_hat_no_decoder<br>use_ddpm_x_hat_use_decoder | —                      | 0      | 4      | 4     | 0.00 | —                                                                                                                                     | no_ddpm_x_no_decoder<br>no_ddpm_x_use_decoder<br>use_ddpm_x_hat_no_decoder<br>use_ddpm_x_hat_no_decoder<br>use_ddpm_x_hat_use_decoder | —                                |

Each configuration’s wins, losses, total comparisons, and win rate are reported, along with the corresponding lists of winning and losing opponents and an evidence summary.

Table 38: Practical evidence assessment of mixup ablations in the MI task

| Config          | Seen |        |       |      |                                                                                                                                                                                        |                                                                                                                                                  |                                       | Unseen |        |       |      |                                                                                                                                                                                       |                                                                                                                                                                     |                                                  |
|-----------------|------|--------|-------|------|----------------------------------------------------------------------------------------------------------------------------------------------------------------------------------------|--------------------------------------------------------------------------------------------------------------------------------------------------|---------------------------------------|--------|--------|-------|------|---------------------------------------------------------------------------------------------------------------------------------------------------------------------------------------|---------------------------------------------------------------------------------------------------------------------------------------------------------------------|--------------------------------------------------|
|                 | Wins | Losses | Total | Rate | Win List                                                                                                                                                                               | Loss List                                                                                                                                        | Evidence                              | Wins   | Losses | Total | Rate | Win List                                                                                                                                                                              | Loss List                                                                                                                                                           | Evidence                                         |
| layer0_randYes  | 10   | 0      | 10    | 1.00 | layer-1_randNo,<br>layer-1_randYes,<br>layer1_randNo,<br>layer1_randYes,<br>layer2_randNo,<br>layer2_randYes,<br>layer3_randNo,<br>layer3_randYes,<br>layer4_randNo,<br>layer4_randYes | —                                                                                                                                                | Strong:7,<br>Moderate:2,<br>Minimal:1 | 9      | 0      | 9     | 1.00 | layer-1_randNo,<br>layer-1_randYes,<br>layer0_randNo,<br>layer1_randNo,<br>layer1_randYes,<br>layer2_randNo,<br>layer2_randYes,<br>layer3_randNo,<br>layer4_randNo,<br>layer4_randYes | —                                                                                                                                                                   | Weak:6,<br>Moderate:2,<br>Strong:1               |
| layer0_randNo   | 9    | 0      | 9     | 1.00 | layer-1_randNo,<br>layer-1_randYes,<br>layer1_randNo,<br>layer2_randNo,<br>layer2_randYes,<br>layer3_randNo,<br>layer3_randYes,<br>layer4_randNo,<br>layer4_randYes                    | —                                                                                                                                                | Moderate:6,<br>Strong:3               | 1      | 3      | 4     | 0.25 | layer1_randNo                                                                                                                                                                         | layer0_randYes,<br>layer2_randYes,<br>layer3_randYes                                                                                                                | Weak:1                                           |
| layer1_randYes  | 9    | 1      | 10    | 0.90 | layer-1_randNo,<br>layer-1_randYes,<br>layer1_randNo,<br>layer2_randNo,<br>layer2_randYes,<br>layer3_randNo,<br>layer3_randYes,<br>layer4_randNo,<br>layer4_randYes                    | layer0_randYes                                                                                                                                   | Strong:6,<br>Moderate:3               | 3      | 3      | 6     | 0.50 | layer-1_randYes,<br>layer1_randNo,<br>layer4_randNo                                                                                                                                   | layer0_randYes,<br>layer2_randYes,<br>layer3_randYes                                                                                                                | Weak:3                                           |
| layer3_randYes  | 6    | 3      | 9     | 0.67 | layer-1_randNo,<br>layer-1_randYes,<br>layer2_randNo,<br>layer2_randYes,<br>layer4_randNo,<br>layer4_randYes                                                                           | layer0_randNo,<br>layer0_randYes,<br>layer1_randYes                                                                                              | Moderate:3,<br>Strong:2,<br>Weak:1    | 8      | 0      | 8     | 1.00 | layer-1_randNo,<br>layer-1_randYes,<br>layer0_randNo,<br>layer1_randNo,<br>layer1_randYes,<br>layer2_randNo,<br>layer3_randNo,<br>layer4_randNo                                       | —                                                                                                                                                                   | Weak:4,<br>Moderate:4                            |
| layer3_randNo   | 5    | 3      | 8     | 0.63 | layer-1_randNo,<br>layer-1_randYes,<br>layer2_randYes,<br>layer4_randNo,<br>layer4_randYes                                                                                             | layer0_randNo,<br>layer0_randYes,<br>layer1_randYes                                                                                              | Weak:3,<br>Moderate:2                 | 2      | 3      | 5     | 0.40 | layer-1_randYes,<br>layer1_randNo                                                                                                                                                     | layer0_randYes,<br>layer2_randYes,<br>layer3_randYes                                                                                                                | Minimal:1,<br>Weak:1                             |
| layer1_randNo   | 4    | 3      | 7     | 0.57 | layer-1_randNo,<br>layer2_randYes,<br>layer4_randNo,<br>layer4_randYes                                                                                                                 | layer0_randNo,<br>layer0_randYes,<br>layer1_randYes                                                                                              | Moderate:2,<br>Weak:1,<br>Minimal:1   | 0      | 9      | 9     | 0.00 | —                                                                                                                                                                                     | layer-1_randNo,<br>layer0_randNo,<br>layer0_randYes,<br>layer1_randYes,<br>layer2_randNo,<br>layer2_randYes,<br>layer3_randNo,<br>layer3_randYes,<br>layer4_randYes | —                                                |
| layer2_randNo   | 3    | 4      | 7     | 0.43 | layer-1_randNo,<br>layer2_randYes,<br>layer4_randNo                                                                                                                                    | layer0_randNo,<br>layer0_randYes,<br>layer1_randYes,<br>layer3_randYes                                                                           | Weak:1,<br>Minimal:1,<br>Moderate:1   | 3      | 3      | 6     | 0.50 | layer-1_randNo,<br>layer-1_randYes,<br>layer1_randNo                                                                                                                                  | layer0_randYes,<br>layer2_randYes,<br>layer3_randYes                                                                                                                | Moderate:2,<br>Minimal:1                         |
| layer-1_randYes | 1    | 5      | 6     | 0.17 | layer-1_randNo                                                                                                                                                                         | layer0_randNo,<br>layer0_randYes,<br>layer1_randYes,<br>layer3_randNo,<br>layer3_randYes                                                         | Weak:1                                | 0      | 8      | 8     | 0.00 | —                                                                                                                                                                                     | layer-1_randNo,<br>layer0_randYes,<br>layer1_randYes,<br>layer2_randNo,<br>layer2_randYes,<br>layer3_randNo,<br>layer3_randYes,<br>layer4_randYes                   | —                                                |
| layer2_randYes  | 1    | 7      | 8     | 0.13 | layer4_randNo                                                                                                                                                                          | layer0_randNo,<br>layer0_randYes,<br>layer1_randNo,<br>layer1_randYes,<br>layer2_randNo,<br>layer3_randNo,<br>layer3_randYes                     | Weak:1                                | 8      | 0      | 8     | 1.00 | layer-1_randNo,<br>layer-1_randYes,<br>layer0_randNo,<br>layer1_randNo,<br>layer1_randYes,<br>layer2_randNo,<br>layer3_randNo,<br>layer4_randYes                                      | —                                                                                                                                                                   | Weak:4,<br>Strong:2,<br>Moderate:1,<br>Minimal:1 |
| layer-1_randNo  | 0    | 8      | 8     | 0.00 | —                                                                                                                                                                                      | layer-1_randYes,<br>layer0_randNo,<br>layer0_randYes,<br>layer1_randNo,<br>layer1_randYes,<br>layer2_randNo,<br>layer3_randNo,<br>layer3_randYes | —                                     | 2      | 4      | 6     | 0.33 | layer-1_randYes,<br>layer1_randNo                                                                                                                                                     | layer0_randYes,<br>layer2_randNo,<br>layer2_randYes,<br>layer3_randYes                                                                                              | Weak:1,<br>Moderate:1                            |
| layer4_randNo   | 0    | 8      | 8     | 0.00 | —                                                                                                                                                                                      | layer0_randNo,<br>layer0_randYes,<br>layer1_randNo,<br>layer1_randYes,<br>layer2_randNo,<br>layer2_randYes,<br>layer3_randNo,<br>layer3_randYes  | —                                     | 0      | 3      | 3     | 0.00 | —                                                                                                                                                                                     | layer0_randYes,<br>layer1_randYes,<br>layer3_randYes                                                                                                                | —                                                |
| layer4_randYes  | 0    | 6      | 6     | 0.00 | —                                                                                                                                                                                      | layer0_randNo,<br>layer0_randYes,<br>layer1_randNo,<br>layer1_randYes,<br>layer3_randNo,<br>layer3_randYes                                       | —                                     | 2      | 2      | 4     | 0.50 | layer-1_randYes,<br>layer1_randNo                                                                                                                                                     | layer0_randYes,<br>layer2_randYes                                                                                                                                   | Weak:2                                           |

Each row shows win/loss stats and qualitative evidence for seen and unseen subject comparisons.

Table 39: Practical evidence assessment of decoder input ablations in the imagined speech task

| Config            | Seen     |        |       |              |                                                                        |                                                                                                          |                                  | Unseen   |        |       |              |                                                                                                       |                                                                                                       |                                  |
|-------------------|----------|--------|-------|--------------|------------------------------------------------------------------------|----------------------------------------------------------------------------------------------------------|----------------------------------|----------|--------|-------|--------------|-------------------------------------------------------------------------------------------------------|-------------------------------------------------------------------------------------------------------|----------------------------------|
|                   | Wins     | Losses | Total | Rate         | Win List                                                               | Loss List                                                                                                | Evidence                         | Wins     | Losses | Total | Rate         | Win List                                                                                              | Loss List                                                                                             | Evidence                         |
| x + x.hat         | <b>5</b> | 0      | 5     | <b>1.00</b>  | skips<br>x + skips<br>z + skips<br>z + x<br>z only                     | —                                                                                                        | Moderate:3<br>Strong:1<br>Weak:1 | 1        | 7      | 8     | 0.125        | z + skips                                                                                             | skips<br>x + skips<br>x + x.hat + skips<br>x.hat + skips<br>z + x<br>z + x.hat<br>z only              | Weak:1                           |
| z + x             | <b>5</b> | 1      | 6     | <b>0.833</b> | x + skips<br>x + x.hat + skips<br>x.hat + skips<br>z + x.hat<br>z only | x + x.hat                                                                                                | Weak:4<br>Strong:1               | 4        | 0      | 4     | 1.00         | skips<br>x + x.hat + skips<br>z + skips<br>z only                                                     | —                                                                                                     | Weak:2<br>Strong:2               |
| z + skips         | 4        | 1      | 5     | 0.800        | x + skips<br>x + x.hat + skips<br>x.hat + skips<br>z only              | x + x.hat                                                                                                | Weak:2<br>Moderate:2             | 0        | 7      | 7     | 0.000        | —                                                                                                     | skips<br>x + skips<br>x + x.hat<br>x + x.hat + skips<br>x.hat + skips<br>z + x<br>z + x.hat<br>z only | —                                |
| skips             | 3        | 1      | 4     | 0.750        | x + skips<br>x + x.hat + skips<br>z only                               | x + x.hat                                                                                                | Weak:2<br>Moderate:1             | 3        | 5      | 8     | 0.375        | x + x.hat<br>z + skips<br>z + x                                                                       | x + skips<br>x + x.hat + skips<br>x.hat + skips<br>z + x.hat<br>z only                                | Weak:3                           |
| z + x.hat         | 3        | 1      | 4     | 0.750        | x + x.hat + skips<br>x.hat + skips<br>z only                           | z + x                                                                                                    | Weak:2<br>Strong:1               | <b>8</b> | 0      | 8     | <b>1.00</b>  | skips<br>x + skips<br>x + x.hat<br>x + x.hat + skips<br>x.hat + skips<br>z + skips<br>z + x<br>z only | —                                                                                                     | Weak:4<br>Moderate:3<br>Strong:1 |
| x.hat + skips     | 1        | 3      | 4     | 0.250        | z only                                                                 | z + skips<br>z + x<br>z + x.hat                                                                          | Strong:1                         | <b>6</b> | 1      | 7     | <b>0.857</b> | skips<br>x + skips<br>x + x.hat<br>z + skips<br>z + x<br>z only                                       | z + x.hat                                                                                             | Weak:3<br>Moderate:2<br>Strong:1 |
| x + skips         | 1        | 4      | 5     | 0.200        | z only                                                                 | skips<br>x + x.hat<br>z + skips<br>z + x                                                                 | Moderate:1                       | 3        | 3      | 6     | 0.500        | skips<br>x + x.hat<br>z + skips                                                                       | x + x.hat + skips<br>x.hat + skips<br>z + x.hat                                                       | Weak:1<br>Strong:1<br>Moderate:1 |
| x + x.hat + skips | 1        | 4      | 5     | 0.200        | z only                                                                 | skips<br>z + skips<br>z + x<br>z + x.hat                                                                 | Moderate:1                       | <b>6</b> | 1      | 7     | <b>0.857</b> | skips<br>x + skips<br>x + x.hat<br>z + skips<br>z + x<br>z only                                       | z + x.hat                                                                                             | Weak:3<br>Moderate:2<br>Strong:1 |
| z only            | 0        | 8      | 8     | 0.00         | —                                                                      | skips<br>x + skips<br>x + x.hat<br>x + x.hat + skips<br>x.hat + skips<br>z + skips<br>z + x<br>z + x.hat | —                                | 4        | 3      | 7     | 0.571        | skips<br>x + x.hat<br>z + skips<br>z + x                                                              | x + x.hat + skips<br>x.hat + skips<br>z + x.hat                                                       | Weak:3<br>Moderate:1             |

Each configuration’s wins, losses, total comparisons, and win rate are reported, along with the corresponding lists of winning and losing opponents and an evidence summary.

Table 40: Practical evidence assessment of classifier type ablations in the imagined speech task

| Config                       | Seen |        |       |      |                                                                                                                                           |                                                                                                                                              | Unseen                 |      |        |       |      |                                                                                                                                  |                                                                                                                           |                                  |
|------------------------------|------|--------|-------|------|-------------------------------------------------------------------------------------------------------------------------------------------|----------------------------------------------------------------------------------------------------------------------------------------------|------------------------|------|--------|-------|------|----------------------------------------------------------------------------------------------------------------------------------|---------------------------------------------------------------------------------------------------------------------------|----------------------------------|
|                              | Wins | Losses | Total | Rate | Win List                                                                                                                                  | Loss List                                                                                                                                    | Evidence               | Wins | Losses | Total | Rate | Win List                                                                                                                         | Loss List                                                                                                                 | Evidence                         |
| fc_classifier_decoder.out    | 6    | 0      | 6     | 1.00 | egnet_classifier_decoder.out<br>egnet_classifier_x<br>egnet_classifier_x_hat<br>fc_classifier_x<br>fc_classifier_x_hat<br>fc_classifier_z | —                                                                                                                                            | Strong:3<br>Moderate:3 | 1    | 4      | 5     | 0.20 | egnet_classifier_x_hat<br>egnet_classifier_decoder.out<br>egnet_classifier_x<br>fc_classifier_x_hat<br>fc_classifier_z           | egnet_classifier_decoder.out<br>egnet_classifier_x<br>fc_classifier_x_hat<br>fc_classifier_z                              | Weak:1                           |
| fc_classifier_x              | 4    | 1      | 5     | 0.80 | egnet_classifier_x<br>egnet_classifier_x_hat<br>fc_classifier_z                                                                           | fc_classifier_decoder.out                                                                                                                    | Strong:3<br>Weak:1     | 0    | 4      | 4     | 0.00 | —                                                                                                                                | egnet_classifier_decoder.out<br>egnet_classifier_x<br>fc_classifier_x_hat<br>fc_classifier_z                              | —                                |
| egnet_classifier_decoder.out | 4    | 1      | 5     | 0.80 | egnet_classifier_x<br>egnet_classifier_x_hat<br>fc_classifier_z                                                                           | fc_classifier_decoder.out                                                                                                                    | Strong:3<br>Moderate:1 | 4    | 1      | 5     | 0.80 | egnet_classifier_x_hat<br>fc_classifier_decoder.out<br>fc_classifier_x<br>egnet_classifier_x_hat<br>fc_classifier_z              | egnet_classifier_decoder.out<br>egnet_classifier_x<br>fc_classifier_x_hat<br>fc_classifier_z                              | Moderate:3<br>Strong:1           |
| fc_classifier_z              | 3    | 3      | 6     | 0.50 | egnet_classifier_x<br>egnet_classifier_x_hat<br>fc_classifier_x_hat                                                                       | egnet_classifier_decoder.out<br>fc_classifier_decoder.out<br>fc_classifier_x                                                                 | Strong:3               | 6    | 0      | 6     | 1.00 | egnet_classifier_decoder.out<br>egnet_classifier_x<br>egnet_classifier_x_hat<br>fc_classifier_decoder.out<br>fc_classifier_x_hat | egnet_classifier_decoder.out<br>egnet_classifier_x<br>egnet_classifier_x_hat<br>fc_classifier_z                           | Strong:3<br>Moderate:2<br>Weak:1 |
| egnet_classifier_x           | 2    | 4      | 6     | 0.33 | egnet_classifier_x_hat<br>fc_classifier_x_hat                                                                                             | egnet_classifier_decoder.out<br>fc_classifier_decoder.out<br>fc_classifier_x                                                                 | Weak:2                 | 4    | 1      | 5     | 0.80 | egnet_classifier_x_hat<br>egnet_classifier_decoder.out<br>fc_classifier_x<br>fc_classifier_x_hat                                 | fc_classifier_z                                                                                                           | Strong:2<br>Moderate:2           |
| fc_classifier_x_hat          | 1    | 5      | 6     | 0.17 | egnet_classifier_x_hat                                                                                                                    | egnet_classifier_decoder.out<br>egnet_classifier_x<br>fc_classifier_decoder.out<br>fc_classifier_x                                           | Weak:1                 | 3    | 3      | 6     | 0.50 | egnet_classifier_x_hat<br>egnet_classifier_decoder.out<br>fc_classifier_x                                                        | egnet_classifier_decoder.out<br>egnet_classifier_x<br>fc_classifier_x_hat                                                 | Weak:2<br>Strong:1               |
| egnet_classifier_x_hat       | 0    | 6      | 6     | 0.00 | —                                                                                                                                         | egnet_classifier_decoder.out<br>egnet_classifier_x<br>fc_classifier_decoder.out<br>fc_classifier_x<br>fc_classifier_x_hat<br>fc_classifier_z | —                      | 0    | 5      | 5     | 0.00 | —                                                                                                                                | egnet_classifier_decoder.out<br>egnet_classifier_x<br>fc_classifier_decoder.out<br>fc_classifier_x_hat<br>fc_classifier_z | —                                |

Each configuration’s wins, losses, total comparisons, and win rate are reported, along with the corresponding lists of winning and losing opponents and an evidence summary.

Table 41: Practical evidence assessment of architecture ablations in the imagined speech task

| Config                     | Seen |        |       |      |                                                                                                            |                                                                                                                                   | Unseen                 |      |        |       |      |                                                                                                                  |                                                                                                          |                        |
|----------------------------|------|--------|-------|------|------------------------------------------------------------------------------------------------------------|-----------------------------------------------------------------------------------------------------------------------------------|------------------------|------|--------|-------|------|------------------------------------------------------------------------------------------------------------------|----------------------------------------------------------------------------------------------------------|------------------------|
|                            | Wins | Losses | Total | Rate | Win List                                                                                                   | Loss List                                                                                                                         | Evidence               | Wins | Losses | Total | Rate | Win List                                                                                                         | Loss List                                                                                                | Evidence               |
| no_ddpm_x_no_decoder       | 4    | 0      | 4     | 1.00 | use_ddpm_x_no_decoder<br>use_ddpm_x_use_decoder<br>use_ddpm_x_hat_no_decoder<br>use_ddpm_x_hat_use_decoder | —                                                                                                                                 | Strong:3<br>Weak:1     | 3    | 2      | 5     | 0.60 | use_ddpm_x_no_decoder<br>use_ddpm_x_hat_no_decoder<br>use_ddpm_x_hat_use_decoder                                 | no_ddpm_x_use_decoder<br>no_ddpm_x_hat_use_decoder                                                       | Moderate:3             |
| no_ddpm_x_use_decoder      | 3    | 0      | 3     | 1.00 | —                                                                                                          | use_ddpm_x_hat_no_decoder<br>use_ddpm_x_hat_use_decoder                                                                           | Strong:2<br>Moderate:1 | 5    | 0      | 5     | 1.00 | no_ddpm_x_no_decoder<br>use_ddpm_x_no_decoder<br>use_ddpm_x_hat_no_decoder<br>use_ddpm_x_hat_use_decoder         | —                                                                                                        | Strong:4<br>Moderate:1 |
| use_ddpm_x_no_decoder      | 3    | 1      | 4     | 0.75 | use_ddpm_x_use_decoder<br>use_ddpm_x_hat_no_decoder<br>use_ddpm_x_hat_use_decoder                          | no_ddpm_x_no_decoder                                                                                                              | Strong:3               | 2    | 2      | 4     | 0.50 | use_ddpm_x_hat_no_decoder<br>use_ddpm_x_hat_use_decoder<br>use_ddpm_x_hat_use_decoder                            | no_ddpm_x_no_decoder<br>no_ddpm_x_hat_use_decoder                                                        | Weak:1<br>Moderate:1   |
| use_ddpm_x_use_decoder     | 2    | 3      | 5     | 0.40 | use_ddpm_x_hat_no_decoder<br>use_ddpm_x_hat_use_decoder                                                    | no_ddpm_x_no_decoder<br>no_ddpm_x_use_decoder                                                                                     | Strong:2               | 3    | 1      | 4     | 0.75 | no_ddpm_x_no_decoder<br>use_ddpm_x_hat_no_decoder<br>use_ddpm_x_hat_use_decoder                                  | no_ddpm_x_hat_use_decoder                                                                                | Moderate:2<br>Weak:1   |
| use_ddpm_x_hat_no_decoder  | 0    | 4      | 4     | 0.00 | —                                                                                                          | use_ddpm_x_no_decoder<br>no_ddpm_x_no_decoder<br>no_ddpm_x_use_decoder<br>use_ddpm_x_hat_no_decoder<br>use_ddpm_x_hat_use_decoder | —                      | 0    | 5      | 5     | 0.00 | —                                                                                                                | no_ddpm_x_no_decoder<br>no_ddpm_x_use_decoder<br>use_ddpm_x_hat_no_decoder<br>use_ddpm_x_hat_use_decoder | —                      |
| use_ddpm_x_hat_use_decoder | 0    | 4      | 4     | 0.00 | —                                                                                                          | no_ddpm_x_no_decoder<br>no_ddpm_x_use_decoder<br>use_ddpm_x_hat_no_decoder<br>use_ddpm_x_hat_use_decoder                          | —                      | 1    | 4      | 5     | 0.20 | use_ddpm_x_hat_no_decoder<br>no_ddpm_x_hat_no_decoder<br>no_ddpm_x_hat_use_decoder<br>use_ddpm_x_hat_use_decoder | no_ddpm_x_no_decoder<br>no_ddpm_x_use_decoder<br>use_ddpm_x_hat_no_decoder                               | Weak:1                 |

Each configuration’s wins, losses, total comparisons, and win rate are reported, along with the corresponding lists of winning and losing opponents and an evidence summary.

Table 42: Practical evidence assessment of mixup ablations in the imagined speech task

| Config          | Seen |        |       |      |                                                                                                                                                                                                          |                                                                                                                              |                                    | Unseen |        |       |      |                                                                                                            |                                                                                                                                                                                                           |                                    |
|-----------------|------|--------|-------|------|----------------------------------------------------------------------------------------------------------------------------------------------------------------------------------------------------------|------------------------------------------------------------------------------------------------------------------------------|------------------------------------|--------|--------|-------|------|------------------------------------------------------------------------------------------------------------|-----------------------------------------------------------------------------------------------------------------------------------------------------------------------------------------------------------|------------------------------------|
|                 | Wins | Losses | Total | Rate | Win List                                                                                                                                                                                                 | Loss List                                                                                                                    | Evidence                           | Wins   | Losses | Total | Rate | Win List                                                                                                   | Loss List                                                                                                                                                                                                 | Evidence                           |
| layer0_randYes  | 11   | 0      | 11    | 1.00 | layer-1_randNo,<br>layer-1_randYes,<br>layer0_randNo,<br>layer1_randNo,<br>layer1_randYes,<br>layer2_randNo,<br>layer2_randYes,<br>layer3_randNo,<br>layer3_randYes,<br>layer4_randNo,<br>layer4_randYes | —                                                                                                                            | Strong:11                          | 5      | 2      | 7     | 0.71 | layer-1_randYes,<br>layer1_randNo,<br>layer1_randYes,<br>layer2_randNo,<br>layer3_randNo                   | layer-1_randNo,<br>layer2_randYes                                                                                                                                                                         | Strong:3,<br>Weak:2                |
| layer1_randNo   | 7    | 1      | 8     | 0.88 | layer-1_randNo,<br>layer-1_randYes,<br>layer0_randNo,<br>layer2_randYes,<br>layer3_randNo,<br>layer4_randNo,<br>layer4_randYes                                                                           | layer0_randYes                                                                                                               | Weak:6,<br>Moderate:1              | 4      | 6      | 10    | 0.40 | layer-1_randYes,<br>layer1_randYes,<br>layer2_randNo,<br>layer3_randNo                                     | layer-1_randNo,<br>layer0_randYes,<br>layer2_randYes,<br>layer3_randYes,<br>layer4_randNo,<br>layer4_randYes                                                                                              | Weak:2,<br>Strong:1,<br>Moderate:1 |
| layer1_randYes  | 6    | 1      | 7     | 0.86 | layer0_randNo,<br>layer2_randNo,<br>layer2_randYes,<br>layer3_randNo,<br>layer3_randYes,<br>layer4_randNo                                                                                                | layer0_randYes                                                                                                               | Moderate:6                         | 1      | 3      | 4     | 0.25 | layer3_randNo                                                                                              | layer0_randYes,<br>layer1_randNo,<br>layer2_randYes                                                                                                                                                       | Moderate:1                         |
| layer2_randNo   | 3    | 2      | 5     | 0.60 | layer0_randNo,<br>layer2_randYes,<br>layer4_randNo                                                                                                                                                       | layer0_randYes,<br>layer1_randYes                                                                                            | Moderate:2,<br>Weak:1              | 1      | 9      | 10    | 0.10 | layer3_randNo                                                                                              | layer-1_randNo,<br>layer-1_randYes,<br>layer0_randNo,<br>layer0_randYes,<br>layer1_randNo,<br>layer2_randYes,<br>layer3_randYes,<br>layer4_randNo,<br>layer4_randYes                                      | Strong:1                           |
| layer3_randNo   | 4    | 3      | 7     | 0.57 | layer0_randNo,<br>layer2_randYes,<br>layer3_randYes,<br>layer4_randNo                                                                                                                                    | layer0_randYes,<br>layer1_randNo,<br>layer1_randYes                                                                          | Moderate:2,<br>Weak:1,<br>Strong:1 | 0      | 11     | 11    | 0.00 | —                                                                                                          | layer-1_randNo,<br>layer-1_randYes,<br>layer0_randNo,<br>layer0_randYes,<br>layer1_randNo,<br>layer1_randYes,<br>layer2_randNo,<br>layer2_randYes,<br>layer3_randYes,<br>layer4_randNo,<br>layer4_randYes | —                                  |
| layer-1_randNo  | 1    | 2      | 3     | 0.33 | layer4_randNo                                                                                                                                                                                            | layer0_randYes,<br>layer1_randNo                                                                                             | Moderate:1                         | 6      | 0      | 6     | 1.00 | layer-1_randYes,<br>layer0_randNo,<br>layer0_randYes,<br>layer1_randNo,<br>layer2_randNo,<br>layer3_randNo | —                                                                                                                                                                                                         | Moderate:3,<br>Weak:2,<br>Strong:1 |
| layer0_randNo   | 1    | 5      | 6     | 0.17 | layer4_randNo                                                                                                                                                                                            | layer0_randYes,<br>layer1_randNo,<br>layer1_randYes,<br>layer2_randNo,<br>layer3_randNo,<br>layer0_randYes,<br>layer1_randNo | Moderate:1                         | 3      | 1      | 4     | 0.75 | layer-1_randYes,<br>layer2_randNo,<br>layer3_randNo                                                        | layer-1_randNo                                                                                                                                                                                            | Moderate:2,<br>Strong:1            |
| layer-1_randYes | 0    | 2      | 2     | 0.00 | —                                                                                                                                                                                                        | layer0_randYes,<br>layer1_randYes,<br>layer1_randNo                                                                          | —                                  | 2      | 4      | 6     | 0.33 | layer2_randNo,<br>layer3_randNo                                                                            | layer-1_randNo,<br>layer0_randNo,<br>layer0_randYes,<br>layer1_randNo                                                                                                                                     | Moderate:1,<br>Strong:1            |
| layer2_randYes  | 0    | 5      | 5     | 0.00 | —                                                                                                                                                                                                        | layer0_randYes,<br>layer1_randNo,<br>layer1_randYes,<br>layer2_randNo,<br>layer3_randNo                                      | —                                  | 5      | 0      | 5     | 1.00 | layer0_randYes,<br>layer1_randNo,<br>layer1_randYes,<br>layer2_randNo,<br>layer3_randNo                    | —                                                                                                                                                                                                         | Moderate:3,<br>Weak:1,<br>Strong:1 |
| layer3_randYes  | 0    | 3      | 3     | 0.00 | —                                                                                                                                                                                                        | layer0_randYes,<br>layer1_randYes,<br>layer3_randNo                                                                          | —                                  | 3      | 0      | 3     | 1.00 | layer1_randNo,<br>layer2_randNo,<br>layer3_randNo                                                          | —                                                                                                                                                                                                         | Weak:1,<br>Moderate:1,<br>Strong:1 |
| layer4_randNo   | 0    | 7      | 7     | 0.00 | —                                                                                                                                                                                                        | layer-1_randNo,<br>layer0_randNo,<br>layer0_randYes,<br>layer1_randNo,<br>layer1_randYes,<br>layer2_randNo,<br>layer3_randNo | —                                  | 3      | 0      | 3     | 1.00 | layer1_randNo,<br>layer2_randNo,<br>layer3_randNo                                                          | —                                                                                                                                                                                                         | Weak:1,<br>Moderate:1,<br>Strong:1 |
| layer4_randYes  | 0    | 2      | 2     | 0.00 | —                                                                                                                                                                                                        | layer0_randYes,<br>layer1_randNo                                                                                             | —                                  | 3      | 0      | 3     | 1.00 | layer1_randNo,<br>layer2_randNo,<br>layer3_randNo                                                          | —                                                                                                                                                                                                         | Weak:1,<br>Moderate:1,<br>Strong:1 |

Each row shows win/loss stats and qualitative evidence for seen and unseen subject comparisons.



Table 43: Bayesian evidence assessment of decoder input ablations on seen subjects in the SSVEP task

| config_1          | config_2      | mean_diff       | p_left         | p_rope       | p_right        | n_seeds |
|-------------------|---------------|-----------------|----------------|--------------|----------------|---------|
| x + x_hat + skips | x + x_hat     | 0.006993006993  | 0.4072213877   | 0.4576239803 | 0.135154632    | 3       |
| x + x_hat + skips | x_hat + skips | 0.001554001554  | 0.1277370191   | 0.7904370663 | 0.08182591465  | 3       |
| x + x_hat + skips | x + skips     | 0.002331002331  | 0.05622746549  | 0.9195907337 | 0.02418180077  | 3       |
| x + x_hat + skips | skips         | 0.01825951826   | 0.6552695743   | 0.2173670696 | 0.1273633562   | 3       |
| x + x_hat + skips | z only        | 0.00777000777   | 0.4601924043   | 0.3082698215 | 0.2315377742   | 3       |
| x + x_hat + skips | z + x         | 0.009712509713  | 0.4872757353   | 0.4465708069 | 0.06615345775  | 3       |
| x + x_hat + skips | z + x_hat     | 0.006993006993  | 0.291618297    | 0.6748438492 | 0.03353785374  | 3       |
| x + x_hat + skips | z + skips     | 0.005439005439  | 0.3449252349   | 0.5256993868 | 0.1293753783   | 3       |
| x + x_hat         | x_hat + skips | -0.005439005439 | 0.165056371    | 0.463719159  | 0.37122447     | 3       |
| x + x_hat         | x + skips     | -0.004662004662 | 0.1867724085   | 0.4536427293 | 0.3595848622   | 3       |
| x + x_hat         | skips         | 0.01126651127   | 0.5451105314   | 0.3726927806 | 0.08219668798  | 3       |
| x + x_hat         | z only        | 0.000777000777  | 0.2351467355   | 0.5595924463 | 0.2052608182   | 3       |
| x + x_hat         | z + x         | 0.00271950272   | 0.1342152618   | 0.8069448934 | 0.05883984476  | 3       |
| x + x_hat         | z + x_hat     | 3.70E-17        | 0.2621371795   | 0.475725641  | 0.2621371795   | 3       |
| x + x_hat         | z + skips     | -0.001554001554 | 0.2788090622   | 0.3907941262 | 0.3303968116   | 3       |
| x_hat + skips     | x + skips     | 0.000777000777  | 0.057196689    | 0.8989675316 | 0.0438357794   | 3       |
| x_hat + skips     | skips         | 0.01670551671   | 0.6462311243   | 0.2402124945 | 0.1135563811   | 3       |
| x_hat + skips     | z only        | 0.006216006216  | 0.4259897872   | 0.3439535126 | 0.2300567002   | 3       |
| x_hat + skips     | z + x         | 0.008158508159  | 0.4138874767   | 0.5186213571 | 0.06749116622  | 3       |
| x_hat + skips     | z + x_hat     | 0.005439005439  | 0.05348962787  | 0.9410602535 | 0.005450118599 | 3       |
| x_hat + skips     | z + skips     | 0.003885003885  | 0.1739873248   | 0.7710487483 | 0.05496392697  | 3       |
| x + skips         | skips         | 0.01592851593   | 0.6128314643   | 0.2430106582 | 0.1441578775   | 3       |
| x + skips         | z only        | 0.005439005439  | 0.4213678234   | 0.3158824392 | 0.2627497374   | 3       |
| x + skips         | z + x         | 0.007381507382  | 0.3977108733   | 0.5079004852 | 0.09438864146  | 3       |
| x + skips         | z + x_hat     | 0.004662004662  | 0.0644456337   | 0.9253444009 | 0.01020996542  | 3       |
| x + skips         | z + skips     | 0.003108003108  | 0.2208576006   | 0.673134884  | 0.1060075154   | 3       |
| skips             | z only        | -0.01048951049  | 0.009178275343 | 0.4297996164 | 0.5610221082   | 3       |
| skips             | z + x         | -0.008547008547 | 0.1032182657   | 0.4476016877 | 0.4491800465   | 3       |
| skips             | z + x_hat     | -0.01126651127  | 0.1694595733   | 0.304340691  | 0.5261997357   | 3       |
| skips             | z + skips     | -0.01282051282  | 0.1632223436   | 0.2808168648 | 0.5559607915   | 3       |
| z only            | z + x         | 0.001942501943  | 0.2821134095   | 0.5093980036 | 0.208488587    | 3       |
| z only            | z + x_hat     | -0.000777000777 | 0.3171595098   | 0.3421932156 | 0.3406472746   | 3       |
| z only            | z + skips     | -0.002331002331 | 0.3033447828   | 0.3252097791 | 0.3714454381   | 3       |
| z + x             | z + x_hat     | -0.00271950272  | 0.1386152854   | 0.618199462  | 0.2431852526   | 3       |
| z + x             | z + skips     | -0.004273504274 | 0.1744886081   | 0.4881975089 | 0.337313883    | 3       |
| z + x_hat         | z + skips     | -0.001554001554 | 0.0793232897   | 0.7962580914 | 0.1244186189   | 3       |

Table 44: Bayesian evidence assessment of decoder input ablations on unseen subjects in the SSVEP task

| config_1          | config_2      | mean_diff       | p_left        | p_rope        | p_right       | n_seeds |
|-------------------|---------------|-----------------|---------------|---------------|---------------|---------|
| x + x_hat + skips | x + x_hat     | -0.01282051282  | 0.0491903225  | 0.3260644706  | 0.6247452069  | 3       |
| x + x_hat + skips | x_hat + skips | -0.004273504274 | 0.1753950877  | 0.4865895812  | 0.3380153311  | 3       |
| x + x_hat + skips | x + skips     | 0.01388888889   | 0.7620140193  | 0.2213532638  | 0.01663271685 | 3       |
| x + x_hat + skips | skips         | 0.005341880342  | 0.4343899953  | 0.265424077   | 0.3001859277  | 3       |
| x + x_hat + skips | z only        | -0.01602564103  | 0.1639164971  | 0.233235663   | 0.6028478399  | 3       |
| x + x_hat + skips | z + x         | 0.01068376068   | 0.5356858485  | 0.4182145309  | 0.04609962059 | 3       |
| x + x_hat + skips | z + x_hat     | 0.005341880342  | 0.4334799737  | 0.2686965897  | 0.2978234365  | 3       |
| x + x_hat + skips | z + skips     | -0.004273504274 | 0.2210581421  | 0.4091356847  | 0.3698061732  | 3       |
| x + x_hat         | x_hat + skips | 0.008547008547  | 0.4736673258  | 0.3055536853  | 0.2207789889  | 3       |
| x + x_hat         | x + skips     | 0.02670940171   | 0.8481200192  | 0.1045169345  | 0.04736304634 | 3       |
| x + x_hat         | skips         | 0.01816239316   | 0.6595313467  | 0.2193905632  | 0.1210780901  | 3       |
| x + x_hat         | z only        | -0.003205128205 | 0.2513575889  | 0.3900876037  | 0.3585548074  | 3       |
| x + x_hat         | z + x         | 0.0235042735    | 0.9215492218  | 0.06270373278 | 0.01574704541 | 3       |
| x + x_hat         | z + x_hat     | 0.01816239316   | 0.5995193453  | 0.1874197081  | 0.2130609465  | 3       |
| x + x_hat         | z + skips     | 0.008547008547  | 0.4309028719  | 0.5050801286  | 0.06401699946 | 3       |
| x_hat + skips     | x + skips     | 0.01816239316   | 0.8084563537  | 0.1605116455  | 0.03103200074 | 3       |
| x_hat + skips     | skips         | 0.009615384615  | 0.496279061   | 0.1811444739  | 0.3225764651  | 3       |
| x_hat + skips     | z only        | -0.01175213675  | 0.2745850211  | 0.2050900957  | 0.5203248832  | 3       |
| x_hat + skips     | z + x         | 0.01495726496   | 0.5974712829  | 0.256193859   | 0.1463348581  | 3       |
| x_hat + skips     | z + x_hat     | 0.009615384615  | 0.4945607409  | 0.248020708   | 0.2574185511  | 3       |
| x_hat + skips     | z + skips     | 0               | 0.3725136154  | 0.2549727692  | 0.3725136154  | 3       |
| x + skips         | skips         | -0.008547008547 | 0.2957714672  | 0.2217461067  | 0.4824824261  | 3       |
| x + skips         | z only        | -0.02991452991  | 0.1179607274  | 0.1276686708  | 0.7543706018  | 3       |
| x + skips         | z + x         | -0.003205128205 | 0.1686075062  | 0.5386346688  | 0.292757825   | 3       |
| x + skips         | z + x_hat     | -0.008547008547 | 0.2589232622  | 0.2626141784  | 0.4784625594  | 3       |
| x + skips         | z + skips     | -0.01816239316  | 0.1425873074  | 0.2153816627  | 0.6420310299  | 3       |
| skips             | z only        | -0.02136752137  | 0.1243311617  | 0.1849632848  | 0.6907055535  | 3       |
| skips             | z + x         | 0.005341880342  | 0.4231177869  | 0.3049383138  | 0.2719438993  | 3       |
| skips             | z + x_hat     | -3.70E-17       | 0.4155708997  | 0.1688582007  | 0.4155708997  | 3       |
| skips             | z + skips     | -0.009615384615 | 0.09629904233 | 0.4171125382  | 0.4865884194  | 3       |
| z only            | z + x         | 0.02670940171   | 0.8291035932  | 0.1143919903  | 0.05650441656 | 3       |
| z only            | z + x_hat     | 0.02136752137   | 0.6598087955  | 0.1808495094  | 0.159341695   | 3       |
| z only            | z + skips     | 0.01175213675   | 0.5446226142  | 0.3272150548  | 0.1281623311  | 3       |
| z + x             | z + x_hat     | -0.005341880342 | 0.281641804   | 0.2912679113  | 0.4270902847  | 3       |
| z + x             | z + skips     | -0.01495726496  | 0.0765139553  | 0.2726360719  | 0.6508499728  | 3       |
| z + x_hat         | z + skips     | -0.009615384615 | 0.3021151679  | 0.202109754   | 0.4957750781  | 3       |

Table 45: Bayesian evidence assessment of classifier type ablations on seen subjects in the SSVEP task

| config_1                      | config_2                      | mean_diff       | p_left          | p_rope          | p_right         | n_seeds |
|-------------------------------|-------------------------------|-----------------|-----------------|-----------------|-----------------|---------|
| eegnet_classifier_x           | eegnet_classifier_x_hat       | 0.7855477855    | 0.9974747527    | 0.0001244714922 | 0.002400775803  | 3       |
| eegnet_classifier_x           | eegnet_classifier_decoder_out | 0.08935508936   | 0.9978271584    | 0.0007834572033 | 0.001389384359  | 3       |
| eegnet_classifier_x           | fc_classifier_x               | 0.7843822844    | 0.9996831675    | 1.57E-05        | 0.0003010938821 | 3       |
| eegnet_classifier_x           | fc_classifier_x_hat           | 0.8543123543    | 0.999946812     | 2.43E-06        | 5.08E-05        | 3       |
| eegnet_classifier_x           | fc_classifier_decoder_out     | 0.1153846154    | 0.9850522476    | 0.004248642321  | 0.0106991101    | 3       |
| eegnet_classifier_x           | fc_classifier_z               | 0.04079254079   | 0.9479425423    | 0.0308853512    | 0.02117210646   | 3       |
| eegnet_classifier_x_hat       | eegnet_classifier_decoder_out | -0.6961926962   | 0.003419689093  | 0.0002000567375 | 0.9963802542    | 3       |
| eegnet_classifier_x_hat       | fc_classifier_x               | -0.001165501166 | 0.3978407016    | 0.1836293954    | 0.4185299031    | 3       |
| eegnet_classifier_x_hat       | fc_classifier_x_hat           | 0.06876456876   | 0.8055549637    | 0.05399336546   | 0.1404516708    | 3       |
| eegnet_classifier_x_hat       | fc_classifier_decoder_out     | -0.6701631702   | 0.005419803428  | 0.0003276395382 | 0.994252557     | 3       |
| eegnet_classifier_x_hat       | fc_classifier_z               | -0.7447552448   | 0.002980693126  | 0.0001629291043 | 0.9968563778    | 3       |
| eegnet_classifier_decoder_out | fc_classifier_x               | 0.695027195     | 0.9995034081    | 2.77E-05        | 0.0004688562281 | 3       |
| eegnet_classifier_decoder_out | fc_classifier_x_hat           | 0.764957265     | 0.9998358972    | 8.36E-06        | 0.0001557457272 | 3       |
| eegnet_classifier_decoder_out | fc_classifier_decoder_out     | 0.02602952603   | 0.7551509035    | 0.1448922333    | 0.09995686318   | 3       |
| eegnet_classifier_decoder_out | fc_classifier_z               | -0.04856254856  | 0.00604968638   | 0.007581437855  | 0.9863688758    | 3       |
| fc_classifier_x               | fc_classifier_x_hat           | 0.06993006993   | 0.9425081197    | 0.02261977183   | 0.03487210851   | 3       |
| fc_classifier_x               | fc_classifier_decoder_out     | -0.668997669    | 0.001548222681  | 9.49E-05        | 0.9983568467    | 3       |
| fc_classifier_x               | fc_classifier_z               | -0.7435897436   | 0.0003773041956 | 2.08E-05        | 0.9996018672    | 3       |
| fc_classifier_x_hat           | fc_classifier_decoder_out     | -0.7389277389   | 0.0002752569251 | 1.53E-05        | 0.9997094444    | 3       |
| fc_classifier_x_hat           | fc_classifier_z               | -0.8135198135   | 0.0002801819742 | 1.41E-05        | 0.9997057092    | 3       |
| fc_classifier_decoder_out     | fc_classifier_z               | -0.07459207459  | 0.03847802095   | 0.02264037834   | 0.9388816007    | 3       |

Table 46: Bayesian evidence assessment of classifier variants on unseen subjects in the SSVEP task

| config_1                      | config_2                      | mean_diff      | p_left          | p_rope          | p_right        | n_seeds |
|-------------------------------|-------------------------------|----------------|-----------------|-----------------|----------------|---------|
| eegnet_classifier_x           | eegnet_classifier_x_hat       | 0.719017094    | 0.9941250768    | 0.0003126409919 | 0.005562282177 | 3       |
| eegnet_classifier_x           | eegnet_classifier_decoder_out | 0.1047008547   | 0.8517898021    | 0.03221550818   | 0.1159946897   | 3       |
| eegnet_classifier_x           | fc_classifier_x               | 0.6965811966   | 0.9941798993    | 0.0003194766474 | 0.005500624028 | 3       |
| eegnet_classifier_x           | fc_classifier_x_hat           | 0.7702991453   | 0.9919474317    | 0.0003981951421 | 0.007654373153 | 3       |
| eegnet_classifier_x           | fc_classifier_decoder_out     | 0.1153846154   | 0.9031687756    | 0.02244695533   | 0.0743842691   | 3       |
| eegnet_classifier_x           | fc_classifier_z               | -0.03632478632 | 0.1578538502    | 0.1068760593    | 0.7352700904   | 3       |
| eegnet_classifier_x_hat       | eegnet_classifier_decoder_out | -0.6143162393  | 0.0003327796059 | 2.24E-05        | 0.9996448529   | 3       |
| eegnet_classifier_x_hat       | fc_classifier_x               | -0.02243589744 | 0.1644621354    | 0.171609785     | 0.6639280796   | 3       |
| eegnet_classifier_x_hat       | fc_classifier_x_hat           | 0.05128205128  | 0.6739337523    | 0.06729475814   | 0.2587714896   | 3       |
| eegnet_classifier_x_hat       | fc_classifier_decoder_out     | -0.6036324786  | 0.000797597804  | 5.45E-05        | 0.9991478929   | 3       |
| eegnet_classifier_x_hat       | fc_classifier_z               | -0.7553418803  | 0.00335896058   | 0.0001807472277 | 0.9964602922   | 3       |
| eegnet_classifier_decoder_out | fc_classifier_x               | 0.5918803419   | 0.9997431462    | 1.68E-05        | 0.000240079429 | 3       |
| eegnet_classifier_decoder_out | fc_classifier_x_hat           | 0.6655982906   | 0.9951195884    | 0.0002807606336 | 0.004599650926 | 3       |
| eegnet_classifier_decoder_out | fc_classifier_decoder_out     | 0.01068376068  | 0.5183108555    | 0.329521795     | 0.1287369649   | 3       |
| eegnet_classifier_decoder_out | fc_classifier_z               | -0.141025641   | 0.04449883101   | 0.01221778853   | 0.9432833805   | 3       |
| fc_classifier_x               | fc_classifier_decoder_out     | 0.07371794872  | 0.8224598002    | 0.0488305597    | 0.1287096401   | 3       |
| fc_classifier_x               | fc_classifier_z               | -0.5811965812  | 0.0007981961578 | 5.67E-05        | 0.9991450746   | 3       |
| fc_classifier_x_hat           | fc_classifier_z               | -0.7329059829  | 0.002228941662  | 0.0001241570405 | 0.9976469013   | 3       |
| fc_classifier_x_hat           | fc_classifier_decoder_out     | -0.6549145299  | 0.005394449501  | 0.0003339544716 | 0.994271596    | 3       |
| fc_classifier_x_hat           | fc_classifier_z               | -0.8066239316  | 0.002928727096  | 0.0001475315086 | 0.9969237414   | 3       |
| fc_classifier_decoder_out     | fc_classifier_z               | -0.1517094017  | 0.02672121585   | 0.007268100357  | 0.9660106838   | 3       |

Table 47: Bayesian evidence assessment of architecture ablations on seen subjects in the SSVEP task

| config_1                   | config_2                   | mean_diff       | p_left          | p_rope        | p_right         | n_seeds |
|----------------------------|----------------------------|-----------------|-----------------|---------------|-----------------|---------|
| use_ddpm_x_use_decoder     | use_ddpm_x_no_decoder      | -0.004273504274 | 0.1467848185    | 0.539083023   | 0.3141321585    | 3       |
| use_ddpm_x_use_decoder     | use_ddpm_x_hat_use_decoder | 0.7855477855    | 0.9999548373    | 2.24E-06      | 4.29E-05        | 3       |
| use_ddpm_x_use_decoder     | use_ddpm_x_hat_no_decoder  | 0.7836052836    | 0.999244801     | 3.75E-05      | 0.0007176953454 | 3       |
| use_ddpm_x_use_decoder     | no_ddpm_x_use_decoder      | -0.05205905206  | 0.03269113195   | 0.03133239227 | 0.9359764758    | 3       |
| use_ddpm_x_use_decoder     | no_ddpm_x_no_decoder       | -0.05866355866  | 0.05146770661   | 0.03796571886 | 0.9105665745    | 3       |
| use_ddpm_x_no_decoder      | use_ddpm_x_hat_use_decoder | 0.7898212898    | 0.9999754926    | 1.21E-06      | 2.33E-05        | 3       |
| use_ddpm_x_no_decoder      | use_ddpm_x_hat_no_decoder  | 0.7878787879    | 0.9996523997    | 1.72E-05      | 0.0003304095815 | 3       |
| use_ddpm_x_no_decoder      | no_ddpm_x_use_decoder      | -0.04778554779  | 0.008104232996  | 0.01025732533 | 0.9816384417    | 3       |
| use_ddpm_x_no_decoder      | no_ddpm_x_no_decoder       | -0.05439005439  | 0.02293724067   | 0.02198948784 | 0.9550732715    | 3       |
| use_ddpm_x_hat_use_decoder | use_ddpm_x_hat_no_decoder  | -0.001942501943 | 0.3284789163    | 0.2911427916  | 0.380378292     | 3       |
| use_ddpm_x_hat_use_decoder | no_ddpm_x_use_decoder      | -0.8376068376   | 0.0001152440137 | 5.64E-06      | 0.9998791207    | 3       |
| use_ddpm_x_hat_use_decoder | no_ddpm_x_no_decoder       | -0.8442113442   | 0.0001994892911 | 9.67E-06      | 0.9997908367    | 3       |
| use_ddpm_x_hat_no_decoder  | no_ddpm_x_use_decoder      | -0.8356643357   | 0.0002238272147 | 1.10E-05      | 0.9997652057    | 3       |
| use_ddpm_x_hat_no_decoder  | no_ddpm_x_no_decoder       | -0.8422688423   | 2.68E-05        | 1.30E-06      | 0.9999719478    | 3       |
| no_ddpm_x_use_decoder      | no_ddpm_x_no_decoder       | -0.006604506605 | 0.1552197591    | 0.4403376075  | 0.4044426334    | 3       |

Table 48: Bayesian evidence assessment of architecture ablations for unSeen subjects in the SSVEP task

| config_1                   | config_2                   | mean_diff       | p_left         | p_rope          | p_right        | n_seeds |
|----------------------------|----------------------------|-----------------|----------------|-----------------|----------------|---------|
| use_ddpm_x_use_decoder     | use_ddpm_x_no_decoder      | 0.01175213675   | 0.5725664853   | 0.3657018961    | 0.06173161858  | 3       |
| use_ddpm_x_use_decoder     | use_ddpm_x_hat_use_decoder | 0.7713675214    | 0.9975348705   | 0.0001237069014 | 0.002341422619 | 3       |
| use_ddpm_x_use_decoder     | use_ddpm_x_hat_no_decoder  | 0.7767094017    | 0.996752828    | 0.0001614971039 | 0.003085674931 | 3       |
| use_ddpm_x_use_decoder     | no_ddpm_x_use_decoder      | -0.002136752137 | 0.3462081736   | 0.2562844925    | 0.3975073338   | 3       |
| use_ddpm_x_use_decoder     | no_ddpm_x_no_decoder       | -0.008547008547 | 0.01580831276  | 0.6296662858    | 0.3545254015   | 3       |
| use_ddpm_x_no_decoder      | use_ddpm_x_hat_use_decoder | 0.7596153846    | 0.9976326959   | 0.0001206223479 | 0.002246681788 | 3       |
| use_ddpm_x_no_decoder      | use_ddpm_x_hat_no_decoder  | 0.764957265     | 0.9969466315   | 0.0001542178536 | 0.002899150601 | 3       |
| use_ddpm_x_no_decoder      | no_ddpm_x_use_decoder      | -0.01388888889  | 0.2474675827   | 0.2051155102    | 0.5474169071   | 3       |
| use_ddpm_x_no_decoder      | no_ddpm_x_no_decoder       | -0.0202991453   | 0.02714667705  | 0.1212528557    | 0.8516004673   | 3       |
| use_ddpm_x_hat_use_decoder | use_ddpm_x_hat_no_decoder  | 0.005341880342  | 0.347373062    | 0.5156378604    | 0.1369890776   | 3       |
| use_ddpm_x_hat_use_decoder | no_ddpm_x_use_decoder      | -0.7735042735   | 0.005124050777 | 0.0002675815198 | 0.9946083677   | 3       |
| use_ddpm_x_hat_use_decoder | no_ddpm_x_no_decoder       | -0.7799145299   | 0.002494230703 | 0.0001302361551 | 0.9973755331   | 3       |
| use_ddpm_x_hat_no_decoder  | no_ddpm_x_use_decoder      | -0.7788461538   | 0.006097907255 | 0.0003152188219 | 0.9935868739   | 3       |
| use_ddpm_x_hat_no_decoder  | no_ddpm_x_no_decoder       | -0.7852564103   | 0.003223991823 | 0.0001667800573 | 0.9966092281   | 3       |
| no_ddpm_x_use_decoder      | no_ddpm_x_no_decoder       | -0.00641025641  | 0.281984361    | 0.2707144165    | 0.4473012224   | 3       |

Table 49: Bayesian evidence assessment of classifier type ablations on unseen subjects in the SSVEP task

| config_1                      | config_2                      | mean_diff      | p_left          | p_rop           | p_right        | n_seeds |
|-------------------------------|-------------------------------|----------------|-----------------|-----------------|----------------|---------|
| eegnet_classifier_x           | eegnet_classifier_x_hat       | 0.719017094    | 0.9941250768    | 0.0003126409919 | 0.005562282177 | 3       |
| eegnet_classifier_x           | eegnet_classifier_decoder_out | 0.1047008547   | 0.8517898021    | 0.03221550818   | 0.1159946897   | 3       |
| eegnet_classifier_x           | fc_classifier_x               | 0.6965811966   | 0.9941798993    | 0.0003194766474 | 0.005500624028 | 3       |
| eegnet_classifier_x           | fc_classifier_x_hat           | 0.7702991453   | 0.9919474317    | 0.0003981951421 | 0.007654373153 | 3       |
| eegnet_classifier_x           | fc_classifier_decoder_out     | 0.1153846154   | 0.9031687756    | 0.02244695533   | 0.0743842691   | 3       |
| eegnet_classifier_x           | fc_classifier_z               | -0.03632478632 | 0.1578538502    | 0.1068760593    | 0.7352700904   | 3       |
| eegnet_classifier_x_hat       | eegnet_classifier_decoder_out | -0.6143162393  | 0.0003327796059 | 2.24E-05        | 0.9996448529   | 3       |
| eegnet_classifier_x_hat       | fc_classifier_x               | -0.02243589744 | 0.1644621354    | 0.171609785     | 0.6639280796   | 3       |
| eegnet_classifier_x_hat       | fc_classifier_x_hat           | 0.05128205128  | 0.6739337523    | 0.06729475814   | 0.2587714896   | 3       |
| eegnet_classifier_x_hat       | fc_classifier_decoder_out     | -0.6036324786  | 0.000797597804  | 5.45E-05        | 0.9991478929   | 3       |
| eegnet_classifier_x_hat       | fc_classifier_z               | -0.7553418803  | 0.00335896058   | 0.0001807472277 | 0.9964602922   | 3       |
| eegnet_classifier_decoder_out | fc_classifier_x               | 0.5918803419   | 0.9997431462    | 1.68E-05        | 0.000240079429 | 3       |
| eegnet_classifier_decoder_out | fc_classifier_x_hat           | 0.6655982906   | 0.9951195884    | 0.0002807606336 | 0.004599650926 | 3       |
| eegnet_classifier_decoder_out | fc_classifier_decoder_out     | 0.01068376068  | 0.5183108555    | 0.3529521795    | 0.1287369649   | 3       |
| eegnet_classifier_decoder_out | fc_classifier_z               | -0.141025641   | 0.04449883101   | 0.01221778853   | 0.9432833805   | 3       |
| fc_classifier_x               | fc_classifier_x_hat           | 0.07371794872  | 0.8224598002    | 0.0488305597    | 0.1287096401   | 3       |
| fc_classifier_x               | fc_classifier_decoder_out     | -0.5811965812  | 0.0007981961578 | 5.67E-05        | 0.9991450746   | 3       |
| fc_classifier_x               | fc_classifier_z               | -0.7329059829  | 0.002228941662  | 0.0001241570405 | 0.9976469013   | 3       |
| fc_classifier_x_hat           | fc_classifier_decoder_out     | -0.6549145299  | 0.005394449501  | 0.0003339544716 | 0.994271596    | 3       |
| fc_classifier_x_hat           | fc_classifier_z               | -0.8066239316  | 0.002928727096  | 0.0001475315086 | 0.9969237414   | 3       |
| fc_classifier_decoder_out     | fc_classifier_z               | -0.1517094017  | 0.02672121585   | 0.007268100357  | 0.9660106838   | 3       |

Table 50: Pairwise Wilcoxon test results for decoder input ablations on seen subjects in the SSVEP task

| config_1          | config_2      | mean_diff     | p_value | mean_1 | mean_2 | n_seeds |
|-------------------|---------------|---------------|---------|--------|--------|---------|
| x + x_hat + skips | x + x_hat     | 0.0069930070  | 0.5     | 0.8586 | 0.8516 | 3       |
| x + x_hat + skips | x_hat + skips | 0.0015540016  | 0.75    | 0.8586 | 0.8570 | 3       |
| x + x_hat + skips | x + skips     | 0.0023310023  | 0.5     | 0.8586 | 0.8563 | 3       |
| x + x_hat + skips | skips         | 0.0182595183  | 0.25    | 0.8586 | 0.8403 | 3       |
| x + x_hat + skips | z only        | 0.0077700078  | 0.75    | 0.8586 | 0.8508 | 3       |
| x + x_hat + skips | z + x         | 0.0097125097  | 0.25    | 0.8586 | 0.8489 | 3       |
| x + x_hat + skips | z + x_hat     | 0.0069930070  | 0.25    | 0.8586 | 0.8516 | 3       |
| x + x_hat + skips | z + skips     | 0.0054380054  | 0.5     | 0.8586 | 0.8531 | 3       |
| x + x_hat         | x_hat + skips | -0.0054380054 | 0.75    | 0.8516 | 0.8570 | 3       |
| x + x_hat         | x + skips     | -0.0046610047 | 0.5     | 0.8516 | 0.8563 | 3       |
| x + x_hat         | skips         | 0.0112665113  | 0.25    | 0.8516 | 0.8403 | 3       |
| x + x_hat         | z only        | 0.0007770008  | 1.0     | 0.8516 | 0.8508 | 3       |
| x + x_hat         | z + x         | 0.0027195027  | 0.5     | 0.8516 | 0.8489 | 3       |
| x + x_hat         | z + x_hat     | 0.0000000000  | 1.0     | 0.8516 | 0.8516 | 3       |
| x + x_hat         | z + skips     | -0.0015540016 | 0.75    | 0.8516 | 0.8531 | 3       |
| x_hat + skips     | x + skips     | 0.0007770008  | 1.0     | 0.8570 | 0.8563 | 3       |
| x_hat + skips     | skips         | 0.0167055167  | 0.5     | 0.8570 | 0.8403 | 3       |
| x_hat + skips     | z only        | 0.0062160062  | 0.75    | 0.8570 | 0.8508 | 3       |
| x_hat + skips     | z + x         | 0.0081585082  | 0.5     | 0.8570 | 0.8489 | 3       |
| x_hat + skips     | z + x_hat     | 0.0054380054  | 0.25    | 0.8570 | 0.8516 | 3       |
| x_hat + skips     | z + skips     | 0.0038850039  | 0.5     | 0.8570 | 0.8531 | 3       |
| x + skips         | skips         | 0.0159285159  | 0.5     | 0.8563 | 0.8403 | 3       |
| x + skips         | z only        | 0.0054380054  | 0.75    | 0.8563 | 0.8508 | 3       |
| x + skips         | z + x         | 0.0073815074  | 0.5     | 0.8563 | 0.8489 | 3       |
| x + skips         | z + x_hat     | 0.0046610047  | 0.25    | 0.8563 | 0.8516 | 3       |
| x + skips         | z + skips     | 0.0031070031  | 0.75    | 0.8563 | 0.8531 | 3       |
| skips             | z only        | -0.0104895105 | 0.25    | 0.8403 | 0.8508 | 3       |
| skips             | z + x         | -0.0085470085 | 0.5     | 0.8403 | 0.8489 | 3       |
| skips             | z + x_hat     | -0.0112665113 | 0.5     | 0.8403 | 0.8516 | 3       |
| skips             | z + skips     | -0.0128205128 | 0.5     | 0.8403 | 0.8531 | 3       |
| z only            | z + x         | 0.0019425019  | 0.75    | 0.8508 | 0.8489 | 3       |
| z only            | z + x_hat     | -0.0007770008 | 1.0     | 0.8508 | 0.8516 | 3       |
| z only            | z + skips     | -0.0023310023 | 1.0     | 0.8508 | 0.8531 | 3       |
| z + x             | z + x_hat     | -0.0027195027 | 1.0     | 0.8489 | 0.8516 | 3       |
| z + x             | z + skips     | -0.0042735043 | 0.75    | 0.8489 | 0.8531 | 3       |
| z + x_hat         | z + skips     | -0.0015540016 | 1.0     | 0.8516 | 0.8531 | 3       |

Table 51: Pairwise Wilcoxon test results for decoder input ablations on unseen subjects in the SSVEP task

| config_1          | config_2      | mean_diff     | p_value | mean_1 | mean_2 | n_seeds |
|-------------------|---------------|---------------|---------|--------|--------|---------|
| x + x_hat + skips | x + x_hat     | -0.0128205128 | 0.25    | 0.8312 | 0.8440 | 3       |
| x + x_hat + skips | x_hat + skips | -0.0042735043 | 0.75    | 0.8312 | 0.8355 | 3       |
| x + x_hat + skips | x + skips     | 0.0138888889  | 0.25    | 0.8312 | 0.8173 | 3       |
| x + x_hat + skips | skips         | 0.0053418803  | 1.0     | 0.8312 | 0.8259 | 3       |
| x + x_hat + skips | z only        | -0.0160256410 | 0.5     | 0.8312 | 0.8472 | 3       |
| x + x_hat + skips | z + x         | 0.0106837607  | 0.25    | 0.8312 | 0.8205 | 3       |
| x + x_hat + skips | z + x_hat     | 0.0053418803  | 1.0     | 0.8312 | 0.8259 | 3       |
| x + x_hat + skips | z + skips     | -0.0042735043 | 1.0     | 0.8312 | 0.8355 | 3       |
| x + x_hat         | x_hat + skips | 0.0085470085  | 0.75    | 0.8440 | 0.8355 | 3       |
| x + x_hat         | x + skips     | 0.0267094017  | 0.25    | 0.8440 | 0.8173 | 3       |
| x + x_hat         | skips         | 0.0181623932  | 0.5     | 0.8440 | 0.8259 | 3       |
| x + x_hat         | z only        | -0.0032051282 | 0.75    | 0.8440 | 0.8472 | 3       |
| x + x_hat         | z + x         | 0.0235042735  | 0.25    | 0.8440 | 0.8205 | 3       |
| x + x_hat         | z + x_hat     | 0.0181623932  | 0.5     | 0.8440 | 0.8259 | 3       |
| x + x_hat         | z + skips     | 0.0085470085  | 0.5     | 0.8440 | 0.8355 | 3       |
| x_hat + skips     | x + skips     | 0.0181623932  | 0.25    | 0.8355 | 0.8173 | 3       |
| x_hat + skips     | skips         | 0.0096153846  | 0.75    | 0.8355 | 0.8259 | 3       |
| x_hat + skips     | z only        | -0.0117521368 | 0.75    | 0.8355 | 0.8472 | 3       |
| x_hat + skips     | z + x         | 0.0149572649  | 0.5     | 0.8355 | 0.8205 | 3       |
| x_hat + skips     | z + x_hat     | 0.0096153846  | 0.75    | 0.8355 | 0.8259 | 3       |
| x_hat + skips     | z + skips     | 0.0000000000  | 1.0     | 0.8355 | 0.8355 | 3       |
| x + skips         | skips         | -0.0085470085 | 1.0     | 0.8173 | 0.8259 | 3       |
| x + skips         | z only        | -0.0299145299 | 0.5     | 0.8173 | 0.8472 | 3       |
| x + skips         | z + x         | -0.0032051282 | 0.75    | 0.8173 | 0.8205 | 3       |
| x + skips         | z + x_hat     | -0.0085470085 | 1.0     | 0.8173 | 0.8259 | 3       |
| x + skips         | z + skips     | -0.0181623932 | 0.5     | 0.8173 | 0.8355 | 3       |
| skips             | z only        | -0.0213675214 | 0.25    | 0.8259 | 0.8472 | 3       |
| skips             | z + x         | 0.0053418803  | 1.0     | 0.8259 | 0.8205 | 3       |
| skips             | z + x_hat     | 0.0000000000  | 1.0     | 0.8259 | 0.8259 | 3       |
| skips             | z + skips     | -0.0096153846 | 0.5     | 0.8259 | 0.8355 | 3       |
| z only            | z + x         | 0.0267094017  | 0.25    | 0.8472 | 0.8205 | 3       |
| z only            | z + x_hat     | 0.0213675214  | 0.25    | 0.8472 | 0.8259 | 3       |
| z only            | z + skips     | 0.0117521368  | 0.5     | 0.8472 | 0.8355 | 3       |
| z + x             | z + x_hat     | -0.0053418803 | 1.0     | 0.8205 | 0.8259 | 3       |
| z + x             | z + skips     | -0.0149572649 | 0.25    | 0.8205 | 0.8355 | 3       |
| z + x_hat         | z + skips     | -0.0096153846 | 0.75    | 0.8259 | 0.8355 | 3       |

Table 52: Pairwise permutation tests of decoder input ablations on seen subjects in the SSVEP task

| config_1          | config_2      | mean_1 | mean_2 | p_value | statistic | n_seeds | p_value_corrected | significant |
|-------------------|---------------|--------|--------|---------|-----------|---------|-------------------|-------------|
| x + x_hat + skips | x + x_hat     | 0.8586 | 0.8516 | 0.5     | 0.00699   | 3       | 1                 | FALSE       |
| x + x_hat + skips | x_hat + skips | 0.8586 | 0.8570 | 0.8     | 0.00155   | 3       | 1                 | FALSE       |
| x + x_hat + skips | x + skips     | 0.8586 | 0.8563 | 0.6     | 0.00233   | 3       | 1                 | FALSE       |
| x + x_hat + skips | skips         | 0.8586 | 0.8403 | 0.2     | 0.01826   | 3       | 1                 | FALSE       |
| x + x_hat + skips | z only        | 0.8586 | 0.8508 | 0.6     | 0.00777   | 3       | 1                 | FALSE       |
| x + x_hat + skips | z + x         | 0.8586 | 0.8489 | 0.2     | 0.00971   | 3       | 1                 | FALSE       |
| x + x_hat + skips | z + x_hat     | 0.8586 | 0.8516 | 0.1     | 0.00699   | 3       | 1                 | FALSE       |
| x + x_hat + skips | z + skips     | 0.8586 | 0.8531 | 0.4     | 0.00544   | 3       | 1                 | FALSE       |
| x + x_hat         | x_hat + skips | 0.8516 | 0.8570 | 0.5     | -0.00544  | 3       | 1                 | FALSE       |
| x + x_hat         | x + skips     | 0.8516 | 0.8563 | 0.5     | -0.00466  | 3       | 1                 | FALSE       |
| x + x_hat         | skips         | 0.8516 | 0.8403 | 0.4     | 0.01127   | 3       | 1                 | FALSE       |
| x + x_hat         | z only        | 0.8516 | 0.8508 | 1.0     | 0.00078   | 3       | 1                 | FALSE       |
| x + x_hat         | z + x         | 0.8516 | 0.8489 | 0.7     | 0.00272   | 3       | 1                 | FALSE       |
| x + x_hat         | z + x_hat     | 0.8516 | 0.8516 | 1.0     | 0.00000   | 3       | 1                 | FALSE       |
| x + x_hat         | z + skips     | 0.8516 | 0.8531 | 0.9     | -0.00155  | 3       | 1                 | FALSE       |
| x_hat + skips     | x + skips     | 0.8570 | 0.8563 | 0.9     | 0.00078   | 3       | 1                 | FALSE       |
| x_hat + skips     | skips         | 0.8570 | 0.8403 | 0.3     | 0.01671   | 3       | 1                 | FALSE       |
| x_hat + skips     | z only        | 0.8570 | 0.8508 | 0.7     | 0.00622   | 3       | 1                 | FALSE       |
| x_hat + skips     | z + x         | 0.8570 | 0.8489 | 0.3     | 0.00816   | 3       | 1                 | FALSE       |
| x_hat + skips     | z + x_hat     | 0.8570 | 0.8516 | 0.1     | 0.00544   | 3       | 1                 | FALSE       |
| x_hat + skips     | z + skips     | 0.8570 | 0.8531 | 0.5     | 0.00389   | 3       | 1                 | FALSE       |
| x + skips         | skips         | 0.8563 | 0.8403 | 0.3     | 0.01593   | 3       | 1                 | FALSE       |
| x + skips         | z only        | 0.8563 | 0.8508 | 0.7     | 0.00544   | 3       | 1                 | FALSE       |
| x + skips         | z + x         | 0.8563 | 0.8489 | 0.3     | 0.00738   | 3       | 1                 | FALSE       |
| x + skips         | z + x_hat     | 0.8563 | 0.8516 | 0.3     | 0.00466   | 3       | 1                 | FALSE       |
| x + skips         | z + skips     | 0.8563 | 0.8531 | 0.6     | 0.00311   | 3       | 1                 | FALSE       |
| skips             | z only        | 0.8403 | 0.8508 | 0.5     | -0.01049  | 3       | 1                 | FALSE       |
| skips             | z + x         | 0.8403 | 0.8489 | 0.5     | -0.00855  | 3       | 1                 | FALSE       |
| skips             | z + x_hat     | 0.8403 | 0.8516 | 0.4     | -0.01127  | 3       | 1                 | FALSE       |
| skips             | z + skips     | 0.8403 | 0.8531 | 0.3     | -0.01282  | 3       | 1                 | FALSE       |
| z only            | z + x         | 0.8508 | 0.8489 | 0.8     | 0.00194   | 3       | 1                 | FALSE       |
| z only            | z + x_hat     | 0.8508 | 0.8516 | 1.0     | -0.00078  | 3       | 1                 | FALSE       |
| z only            | z + skips     | 0.8508 | 0.8531 | 0.9     | -0.00233  | 3       | 1                 | FALSE       |
| z + x             | z + x_hat     | 0.8489 | 0.8516 | 0.8     | -0.00272  | 3       | 1                 | FALSE       |
| z + x             | z + skips     | 0.8489 | 0.8531 | 0.5     | -0.00427  | 3       | 1                 | FALSE       |
| z + x_hat         | z + skips     | 0.8516 | 0.8531 | 0.9     | -0.00155  | 3       | 1                 | FALSE       |

Table 53: Pairwise permutation tests of decoder input ablations on unseen subjects in the SSVEP task

| config_1          | config_2      | mean_1 | mean_2 | p_value | statistic | n_seeds | p_value_corrected | significant |
|-------------------|---------------|--------|--------|---------|-----------|---------|-------------------|-------------|
| x + x_hat + skips | x + x_hat     | 0.8312 | 0.8440 | 0.6     | -0.0128   | 3       | 1                 | FALSE       |
| x + x_hat + skips | x_hat + skips | 0.8312 | 0.8355 | 0.9     | -0.0043   | 3       | 1                 | FALSE       |
| x + x_hat + skips | x + skips     | 0.8312 | 0.8173 | 0.6     | 0.0139    | 3       | 1                 | FALSE       |
| x + x_hat + skips | skips         | 0.8312 | 0.8259 | 0.9     | 0.0053    | 3       | 1                 | FALSE       |
| x + x_hat + skips | z only        | 0.8312 | 0.8472 | 0.6     | -0.0160   | 3       | 1                 | FALSE       |
| x + x_hat + skips | z + x         | 0.8312 | 0.8205 | 0.5     | 0.0107    | 3       | 1                 | FALSE       |
| x + x_hat + skips | z + x_hat     | 0.8312 | 0.8259 | 0.9     | 0.0053    | 3       | 1                 | FALSE       |
| x + x_hat + skips | z + skips     | 0.8312 | 0.8355 | 0.9     | -0.0043   | 3       | 1                 | FALSE       |
| x + x_hat         | x_hat + skips | 0.8440 | 0.8355 | 0.8     | 0.0085    | 3       | 1                 | FALSE       |
| x + x_hat         | x + skips     | 0.8440 | 0.8173 | 0.5     | 0.0267    | 3       | 1                 | FALSE       |
| x + x_hat         | skips         | 0.8440 | 0.8259 | 0.6     | 0.0182    | 3       | 1                 | FALSE       |
| x + x_hat         | z only        | 0.8440 | 0.8472 | 0.8     | -0.0032   | 3       | 1                 | FALSE       |
| x + x_hat         | z + x         | 0.8440 | 0.8205 | 0.5     | 0.0235    | 3       | 1                 | FALSE       |
| x + x_hat         | z + x_hat     | 0.8440 | 0.8259 | 0.7     | 0.0182    | 3       | 1                 | FALSE       |
| x + x_hat         | z + skips     | 0.8440 | 0.8355 | 0.6     | 0.0085    | 3       | 1                 | FALSE       |
| x_hat + skips     | x + skips     | 0.8355 | 0.8173 | 0.6     | 0.0182    | 3       | 1                 | FALSE       |
| x_hat + skips     | skips         | 0.8355 | 0.8259 | 0.8     | 0.0096    | 3       | 1                 | FALSE       |
| x_hat + skips     | z only        | 0.8355 | 0.8472 | 0.9     | -0.0118   | 3       | 1                 | FALSE       |
| x_hat + skips     | z + x         | 0.8355 | 0.8205 | 0.6     | 0.0150    | 3       | 1                 | FALSE       |
| x_hat + skips     | z + x_hat     | 0.8355 | 0.8259 | 0.7     | 0.0096    | 3       | 1                 | FALSE       |
| x_hat + skips     | z + skips     | 0.8355 | 0.8355 | 1.0     | 0.0000    | 3       | 1                 | FALSE       |
| x + skips         | skips         | 0.8173 | 0.8259 | 0.9     | -0.0085   | 3       | 1                 | FALSE       |
| x + skips         | z only        | 0.8173 | 0.8472 | 0.6     | -0.0299   | 3       | 1                 | FALSE       |
| x + skips         | z + x         | 0.8173 | 0.8205 | 0.9     | -0.0032   | 3       | 1                 | FALSE       |
| x + skips         | z + x_hat     | 0.8173 | 0.8259 | 0.8     | -0.0085   | 3       | 1                 | FALSE       |
| x + skips         | z + skips     | 0.8173 | 0.8355 | 0.7     | -0.0182   | 3       | 1                 | FALSE       |
| skips             | z only        | 0.8259 | 0.8472 | 0.5     | -0.0214   | 3       | 1                 | FALSE       |
| skips             | z + x         | 0.8259 | 0.8205 | 1.0     | 0.0053    | 3       | 1                 | FALSE       |
| skips             | z + x_hat     | 0.8259 | 0.8259 | 1.0     | 0.0000    | 3       | 1                 | FALSE       |
| skips             | z + skips     | 0.8259 | 0.8355 | 0.6     | -0.0096   | 3       | 1                 | FALSE       |
| z only            | z + x         | 0.8472 | 0.8205 | 0.5     | 0.0267    | 3       | 1                 | FALSE       |
| z only            | z + x_hat     | 0.8472 | 0.8259 | 0.6     | 0.0214    | 3       | 1                 | FALSE       |
| z only            | z + skips     | 0.8472 | 0.8355 | 0.6     | 0.0118    | 3       | 1                 | FALSE       |
| z + x             | z + x_hat     | 0.8205 | 0.8259 | 0.9     | -0.0053   | 3       | 1                 | FALSE       |
| z + x             | z + skips     | 0.8205 | 0.8355 | 0.5     | -0.0150   | 3       | 1                 | FALSE       |
| z + x_hat         | z + skips     | 0.8259 | 0.8355 | 0.8     | -0.0096   | 3       | 1                 | FALSE       |



## References

- Y. An, Y. Tong, W. Wang, and S. W. Su. Enhancing eeg signal generation through a hybrid approach integrating reinforcement learning and diffusion models, 2024. URL <https://arxiv.org/abs/2410.00013>.
- K. Barmpas, Y. Panagakis, S. Bakas, D. A. Adamos, N. Laskaris, and S. Zafeiriou. Improving generalization of cnn-based motor-imagery eeg decoders via dynamic convolutions. *IEEE Transactions on Neural Systems and Rehabilitation Engineering*, 31:1997–2005, 2023.
- Z. Chen, P. T. Wang, M. Ibrahim, S. Baveja, R. Mu, A. H. Do, and Z. Nenadic. Leveraging transfer learning and user-specific updates for rapid training of bci decoders. *arXiv preprint arXiv:2506.14120*, 2025.
- W. Chow, J. Li, Q. Yu, K. Pan, H. Fei, Z. Ge, S. Yang, S. Tang, H. Zhang, and Q. Sun. Unified generative and discriminative training for multi-modal large language models. *Advances in Neural Information Processing Systems*, 37:23155–23190, 2024.
- F. Del Pup, A. Zanola, L. F. Tshimanga, A. Bertoldo, L. Finos, and M. Atzori. The role of data partitioning on the performance of eeg-based deep learning models in supervised cross-subject analysis: a preliminary study. *Computers in Biology and Medicine*, 196:110608, 2025.
- W. Grathwohl, K.-C. Wang, J.-H. Jacobsen, D. Duvenaud, M. Norouzi, and K. Swersky. Your classifier is secretly an energy based model and you should treat it like one. *arXiv preprint arXiv:1912.03263*, 2019.
- J. Ho, A. Jain, and P. Abbeel. Denoising diffusion probabilistic models. *Advances in neural information processing systems*, 33:6840–6851, 2020.
- W. Hu, G. Jiang, J. Han, X. Li, and P. Xie. Regional-asymmetric adaptive graph convolutional neural network for diagnosis of autism in children with resting-state eeg. *IEEE Transactions on Neural Systems and Rehabilitation Engineering*, 32:200–211, 2023.
- G. Huang, Z. Zhao, S. Zhang, Z. Hu, J. Fan, M. Fu, J. Chen, Y. Xiao, J. Wang, and G. Dan. Discrepancy between inter-and intra-subject variability in eeg-based motor imagery brain-computer interface: Evidence from multiple perspectives. *Frontiers in neuroscience*, 17:1122661, 2023.
- G. Kim, D. K. Han, and H. Ko. Specmix: A mixed sample data augmentation method for training with time-frequency domain features. *arXiv preprint arXiv:2108.03020*, 2021.
- S. Kim, Y.-E. Lee, S.-H. Lee, and S.-W. Lee. Diff-e: Diffusion-based learning for decoding imagined speech eeg. *arXiv preprint arXiv:2307.14389*, 2023.
- N. Kukhilava, T. Tsmindashvili, R. Kalandadze, A. Gupta, S. Katamadze, F. Brémond, L. M. Ferrari, P. Müller, and B. E. Wirth. Evaluation in eeg emotion recognition: State-of-the-art review and unified framework. *arXiv preprint arXiv:2505.18175*, 2025.
- S. Kunjan, T. S. Grummett, K. J. Pope, D. M. Powers, S. P. Fitzgibbon, T. Bastiampillai, M. Battersby, and T. W. Lewis. The necessity of leave one subject out (loso) cross validation for eeg disease diagnosis. In *International conference on brain informatics*, pages 558–567. Springer, 2021.
- V. J. Lawhern, A. J. Solon, N. R. Waytowich, S. M. Gordon, C. P. Hung, and B. J. Lance. Eegnet: a compact convolutional neural network for eeg-based brain-computer interfaces. *Journal of neural engineering*, 15(5):056013, 2018.
- W. Liao, H. Liu, and W. Wang. Advancing bci with a transformer-based model for motor imagery classification. *Scientific Reports*, 15(1):23380, 2025.
- S. Liu, J. Zhang, A. Wang, H. Wu, Q. Zhao, and J. Long. Subject adaptation convolutional neural network for eeg-based motor imagery classification. *Journal of Neural Engineering*, 19(6):066003, 2022.
- X.-H. Liu, B.-L. Lu, and W.-L. Zheng. mixeeg: Enhancing eeg federated learning for cross-subject eeg classification with tailored mixup. *arXiv preprint arXiv:2504.07987*, 2025.

178 T.-j. Luo and Z. Cai. Diffusion models-based motor imagery eeg sample augmentation via mixup  
179 strategy. *Expert Systems with Applications*, 262:125585, 2025.

180 S. Nakagawa. A farewell to bonferroni: the problems of low statistical power and publication bias.  
181 *Behavioral ecology*, 15(6):1044–1045, 2004.

182 Y. Pei, Z. Luo, Y. Yan, H. Yan, J. Jiang, W. Li, L. Xie, and E. Yin. Data augmentation: Using channel-  
183 level recombination to improve classification performance for motor imagery eeg. *Frontiers in*  
184 *Human Neuroscience*, 15:645952, 2021.

185 C. Rommel, J. Paillard, T. Moreau, and A. Gramfort. Data augmentation for learning predictive  
186 models on eeg: a systematic comparison. *Journal of Neural Engineering*, 19(6):066020, 2022.

187 Y. Song, Q. Zheng, B. Liu, and X. Gao. Eeg conformer: Convolutional transformer for eeg decoding  
188 and visualization. *IEEE Transactions on Neural Systems and Rehabilitation Engineering*, 31:  
189 710–719, 2022.

190 X. Tang, J. Zhang, Y. Qi, K. Liu, R. Li, and H. Wang. A spatial filter temporal graph convolutional  
191 network for decoding motor imagery eeg signals. *Expert Systems with Applications*, 238:121915,  
192 2024.

193 S. Torma and L. Szegletes. Generative modeling and augmentation of eeg signals using improved  
194 diffusion probabilistic models. *Journal of Neural Engineering*, 22(1):016001, 2025. doi: 10.1088/  
195 1741-2552/ada0e4.

196 G. Tosato, C. M. Dalbagno, and F. Fumagalli. Eeg synthetic data generation using probabilistic  
197 diffusion models, 2023. URL <https://arxiv.org/abs/2303.06068>.

198 F.-B. Vialatte and A. Cichocki. Split-test bonferroni correction for qeeg statistical maps. *Biological*  
199 *Cybernetics*, 98(4):295–303, 2008.

200 D. Wu. Online and offline domain adaptation for reducing bci calibration effort. *IEEE Transactions*  
201 *on human-machine Systems*, 47(4):550–563, 2016.

202 H. Zhang, M. Cisse, Y. N. Dauphin, and D. Lopez-Paz. mixup: Beyond empirical risk minimization.  
203 *arXiv preprint arXiv:1710.09412*, 2017.

204 H. Zhang, H. Ji, J. Yu, J. Li, L. Jin, L. Liu, Z. Bai, and C. Ye. Subject-independent eeg classification  
205 based on a hybrid neural network. *Frontiers in Neuroscience*, 17:1124089, 2023.

206 W. Zhao, X. Jiang, B. Zhang, S. Xiao, and S. Weng. Ctnet: a convolutional transformer network for  
207 eeg-based motor imagery classification. *Scientific reports*, 14(1):20237, 2024.
